# Supplementary material for: Socioeconomic inequality in functional deficiencies and chronic diseases among older Indian adults: a sex-stratified cross-sectional decomposition analysis
Source: PubMed Central journal article supplement — BMJ Open. 2019 Feb 27;9(2):e022787. doi: 10.1136/bmjopen-2018-022787 (PMC6398785; doi:10.1136/bmjopen-2018-022787), 2019-02-27
Supplement: bmjopen-2018-022787.draft_revisions.pdf [file bmjopen-2018-022787.draft_revisions.pdf]

# BMJ Open

BMJ Open is committed to open peer review. As part of this commitment we make the peer review history of every article we publish publicly available.

When an article is published we post the peer reviewers' comments and the authors' responses online. We also post the versions of the paper that were used during peer review. These are the versions that the peer review comments apply to.

The versions of the paper that follow are the versions that were submitted during the peer review process. They are not the versions of record or the final published versions. They should not be cited or distributed as the published version of this manuscript.

BMJ Open is an open access journal and the full, final, typeset and author-corrected version of record of the manuscript is available on our site with no access controls, subscription charges or pay-per-view fees (<http://bmjopen.bmj.com>).

If you have any questions on BMJ Open's open peer review process please email [info.bmjopen@bmj.com](mailto:info.bmjopen@bmj.com)

# BMJ Open

## Functional Deficiencies and Chronic Diseases among Indian Older Adults: A Sex-Stratified Cross-Sectional Decomposition Analysis

|                               |                                                                                                                                                                                                                                                               |
|-------------------------------|---------------------------------------------------------------------------------------------------------------------------------------------------------------------------------------------------------------------------------------------------------------|
| Journal:                      | <i>BMJ Open</i>                                                                                                                                                                                                                                               |
| Manuscript ID                 | bmjopen-2018-022787                                                                                                                                                                                                                                           |
| Article Type:                 | Research                                                                                                                                                                                                                                                      |
| Date Submitted by the Author: | 08-Mar-2018                                                                                                                                                                                                                                                   |
| Complete List of Authors:     | Singh, Lucky; National Institute of Medical Statistics, Goel, Richa; Institute for Human Development Rai, Rajesh Kumar; Society for Health and Demographic Surveillance, Singh, Prashant Kumar; TERI School of Advanced Studies, Department of Policy Studies |
| Keywords:                     | functional deficiency, chronic diseases, gender, older adults, India                                                                                                                                                                                          |
|                               |                                                                                                                                                                                                                                                               |

SCHOLARONE™  
Manuscripts

Peer Review Only

**Title Page****Functional Deficiencies and Chronic Diseases among Indian Older Adults: A Sex-Stratified Cross-Sectional Decomposition Analysis****Authors**

Lucky SINGH <sup>1,\*</sup>, Richa GOEL <sup>2</sup>, Rajesh Kumar RAI <sup>3</sup> and Prashant Kumar SINGH<sup>4</sup>

**Keywords:** functional deficiency, chronic diseases, gender, older adults, India

**Word count:** 3134 (excluding title page, abstract, references, figures and tables)

---

*First and corresponding author*

<sup>1</sup>**Lucky Singh**, MSc MPhil PhD  
*Scientist 'C'*

National Institute of Medical Statistics (NIMS), Indian Council of Medical Research (ICMR)  
Ansari Nagar, New Delhi 110029, India  
Email: [lucky.5bhu@gmail.com](mailto:lucky.5bhu@gmail.com)

<sup>2</sup>**Richa Goel**, MA

*Research Associate*

Institute for Human Development  
Plot No. 84, Functional Industrial Estate (FIE), Patparganj, Delhi 110092, India  
Email: [richa\\_731@yahoo.com](mailto:richa_731@yahoo.com)

<sup>3</sup>**Rajesh Kumar Rai**, MA MPhil MPH

*Senior Research Scientist*

Society for Health and Demographic Surveillance  
Suri, Birbhum 731101, West Bengal, India  
Email: [rajesh.iips28@gmail.com](mailto:rajesh.iips28@gmail.com)

<sup>4</sup>**Prashant Kumar Singh**, MA MPS PhD

*Assistant Professor*

Department of Policy Studies, TERI School of Advanced Studies  
VasantKunj, New Delhi 110002, India  
Email: [prashants.geo@gmail.com](mailto:prashants.geo@gmail.com)

## Functional Deficiencies and Chronic Diseases among the Indian Elderly: A Sex-Stratified Cross-Sectional Decomposition Analysis

### Abstract

**Objectives:** The elderly bears the burden of morbidity disproportionately where poverty worsens the condition. Stratified by sex, this study decomposes income-related inequalities for functional deficiencies and chronic diseases among older adults, and identifies the degree to which social and demographic determinants contribute to these inequalities.

**Design:** A nationally representative cross-sectional study.

**Participants:** Data required for this study were retrieved from the World Health Organization (WHO) Study on Global AGEing and Adult Health (SAGE) Wave 1. A total sample of 3753 individuals (male: 1979; and female: 1774) aged 60 years and older were included.

**Measures:** Functional deficiency and presence of chronic diseases were analyzed.

**Method:** The method proposed by Adam Wagstaff and his colleagues was used to attain the study objective.

**Results:** Compared to males, females were disproportionately affected by both functional deficiencies and chronic diseases. Results from decomposition analysis indicate that the relative contribution of socio-demographic factors to functional deficiencies was highest among those with poor economic status (38.5%), followed by illiteracy (22.5%) which collated to 61 per cent to total explained inequalities. Similarly, for chronic diseases, about 93 per cent of the relative contribution was shared by those with poor economic status (42.3%), rural residence (30.5%) and illiteracy (20.3%).

**Conclusion:** Pro-poor intervention strategies should be designed to address functional deficiencies and chronic diseases, with special attention to women. While designing the intervention, the socioeconomic gradient of targeted population should be considered.

**Keywords:** functional deficiency, chronic diseases, gender, older adults, India

### Strength and Limitations of this study

- This is the first study that examines the decomposes the socioeconomic inequality in functional deficiency and chronic illness separately for male and female older population.
- Findings revealed pro-poor inequality in Instrumental Activity of Daily Living (IADL) deficiency and pro-rich inequality in the presence of chronic health among both older men and women in India.
- Poor economic status, illiteracy and rural residence were major contributors to overall IADL deficiency among men. But in case of women, rural residence, belonging to Scheduled Castes/Scheduled Tribes and being Muslim contributed significantly to IADL deficiency.
- The findings further suggest that poor economic status, followed by rural residence and illiteracy contributed the highest in explaining overall inequality in chronic health among both men and women.
- The cross-sectional study design prevents establishment of any causal inferences from the study results.

## Introduction

Globally, compared to males, older females experience lower mortality rates and in a few cases, lower prevalence of chronic diseases [1–4]. Contrary to this, functional limitation and physical disability among women was reported higher than that among men, particularly in low-and-middle income countries [5,6]. Existing evidence shows that the difference in male-female functional limitation could be explained in terms of higher prevalence and severity of arthritis and musculoskeletal disease [4,7] among women along with psychosocial factors – women are more likely to over-report ill health and functional limitations, whereas men would under-report their weaknesses [8]. This pattern may be more evident in low-and-middle income countries where gender norms significantly determine demographic, health and socioeconomic outcomes.

Examining disparities in socioeconomic status and its effect on health outcomes in less developing societies is high priority on global agenda. A study has shown that poor economic status contributes to over half of the inequality in self-rated health among older adults in India, followed by illiteracy and rural residence [9]. However, the distribution of socioeconomic resources between men and women is not the same, which gives rise to different explanations for the existing socioeconomic inequalities in health by gender. Of the total elderly population in India, nearly half of the Indian elderly, mostly women are dependents, often due to widowhood, divorce, or separation [10]. Majority of elderly women are deprived of economic security and prone to receiving poor healthcare [10]. If results for male and female participants are not studied separately, aggregate results may mask important clinical differences in the mechanism of functional deficiency and chronic diseases [11].

Stratified by sex, this study decomposes income-related inequalities for functional deficiencies and chronic diseases among older adults, and identifies the degree to which social

1  
2  
3 and demographic determinants contribute to these inequalities. It is hoped that this study will  
4  
5 strengthen the evidence to prepare and design a rehabilitation programme to improve the  
6  
7 functional capacity and management of chronic diseases among the elderly in India. The  
8  
9 National Health Policy of India 2017 acknowledges the healthcare needs of the aging population  
10  
11 in India and recommends a focused intervention (Ministry of Health & Family Welfare, 2017) to  
12  
13 tackle the rising burden of functional deficiency and chronic diseases [13].  
14  
15

## 16 17 **Methods**

### 18 19 20 *Study Population*

21  
22  
23 Data required for this study were retrieved from the World Health Organization (WHO) Study on  
24  
25 Global AGEing and Adult Health (SAGE) Wave 1, collected between 2007 and 2008 in India.  
26  
27 SAGE is a nationally representative multi-country (China, Ghana, India, Mexico, Russian  
28  
29 Federation, and South Africa) study to monitor the health and well-being of adult populations  
30  
31 aged 50 years and older [14]. In India, respondents were selected from six states –Assam,  
32  
33 Karnataka, Maharashtra, Rajasthan, Uttar Pradesh, and West Bengal, using a multistage,  
34  
35 stratified, random sampling design with every individual having a known non-zero probability of  
36  
37 being selected. Overall, the individual response rate was 92 per cent. More about sampling  
38  
39 process and SAGE India survey can be obtained from the published official report [14,15]. This  
40  
41 study followed the United Nation's agreed age cut-off for defining older population (60 years  
42  
43 and older). A total sample 3753 individuals (male: 1979; and female: 1774) aged 60 years and  
44  
45 older were included.  
46  
47  
48  
49

### 50 51 52 *Functional Deficiency and Chronic Disease*

Two health outcome events - functional deficiency and presence of chronic diseases were analyzed. Functional deficiency was measured in terms of estimating Instrumental Activity of Daily Living (IADL). IADL measures the ability to perform relatively complex activities of daily living. IADL is composed of five items that cover higher level instrumental tasks including heavy or light household work, laundry, preparing meals, shopping for daily necessities, getting around outside, travelling, managing money and using a telephone [15]. The respondents were asked if they had any difficulty doing these instrumental tasks during the thirty days preceding the survey, and their responses were categorized into none, mild, moderate, severe, and extreme/cannot do. For this study, the responses were grouped into different difficulty levels -no difficulty (when the response was none or mild or moderate=0) and difficulty (when the response was severe or extreme=1). The computed value of the sum of dichotomized five variables ranges from 0 to 5, where the higher score indicates poor physical functioning. Besides IADL, respondents were asked if they were diagnosed with any of the following chronic medical conditions (as conveyed by a health care professional that they had the given health condition): angina, asthma, stroke, depression, chronic lung disease and hypertension. The affirmative response against any of these medical conditions was considered presence of chronic disease.

### *Covariates*

Guided by the existing literature, individual and household level binary (1 and 0) covariates that could explain maximum dimensions of inequality were considered. The covariates are sex of the respondent (male, and female), current marital status (married, and unmarried), social group (Scheduled Caste/Scheduled Tribe, and Non-scheduled Caste/Tribe), religion (Muslim, and Others), education of the respondent (illiterate and literate), economic status (poor and non-poor), residence (rural and urban) and tobacco use (never, and ever or current). In dichotomous



1  
2  
3 covariates, the assigned value 1 represents the older population in a disadvantaged  
4 socioeconomic group, and the assigned value of 0 indicates the older population in an  
5 advantageous position.  
6  
7  
8  
9

10 Historically, Scheduled Castes and Scheduled Tribes are identified by the Government of  
11 India as socially and economically backward social groups and considered to be in need of  
12 protection from social injustice and exploitation, whereas non-Scheduled Caste/Tribes enjoy a  
13 higher status in the social group hierarchy. Economic groups (poor and non-poor) were derived  
14 from the household wealth index provided in the dataset, using WHO standard approach to  
15 estimating income from indicator variables [16]. For the decomposition analysis, the top two  
16 quintiles (representing 40% of economic status) were grouped as non-poor, and the bottom three  
17 quintiles (representing 60% of economic status) were combined as poor.  
18  
19  
20  
21  
22  
23  
24  
25  
26  
27  
28  
29

### 30 *Analytical Approach*

31  
32  
33 Stratified by sex, a decomposition analysis was conducted to measure the contribution of select  
34 covariates to explain the burden of IADL and presence of chronic diseases in several steps. First,  
35 the Concentration Index (CI) was estimated to quantify the degree of socioeconomic-related  
36 inequality in health variable [17], IADL and chronic diseases. It can be computed as twice the  
37 (weighted) covariance of the health variable and individual's relative rank in the economic  
38 gradient, divided by the variable mean according to Equation (1) [18]. The value of the CI ranges  
39 between -1 and +1, where negative values explain a variable that is concentrated among  
40 disadvantaged people and positive values indicate the opposite. In the absence of inequality, the  
41 CI will be zero [17].  
42  
43  
44  
45  
46  
47  
48  
49  
50  
51  
52  
53

$$54 \quad \mathbf{C} = \frac{2}{\mu} \text{cov}_w(y_i, R_i) \quad (1)$$

where  $y_i$  and  $R_i$  are, respectively, the health status of the  $i^{\text{th}}$  individual and the fractional rank of the  $i^{\text{th}}$  individual (for weighted data) in terms of the index of household economic status;  $\mu$  is the (weighted) mean of the health of the sample and  $\text{cov}_w$  denotes the weighted covariance.

The method proposed by Wagstaff and colleagues (2003) [19] was used to decompose socioeconomic inequality in poor health into its determinants. This analysis allows estimating how determinants proportionally contribute to inequality in a health variable. They have showed that for any linear regression model, link the health variable of interest,  $y$ , to a set of  $k$  health determinants,  $x_k$ :

$$y_i = \alpha + \sum_{k=1} \beta_k x_{ki} + \varepsilon_i \quad (2)$$

Where  $\varepsilon$  is an error term. Given the relationship between  $y_i$  and  $x_{ki}$  in Equation (2), the CI for  $y$  (C) can be written as:

$$C = \sum_{k=1} \left( \frac{\beta_k \bar{x}_k}{\mu} \right) C_k + \frac{GC_\varepsilon}{\mu} = C_y + \frac{GC_\varepsilon}{\mu}, \quad (3)$$

Where  $\mu$  is the mean of  $y$ ,  $\bar{x}_k$  is the mean of  $x_k$ ,  $C_k$  is the CI for  $x_k$  (defined analogously to C).

In the last term (which can be computed as a residual),  $GC_\varepsilon$  is the generalized concentration index for  $\varepsilon_i$ .

Equation (3) shows that C can be thought of as being made up of two components. The first is the deterministic, or ‘explained’, component. This is equal to a weighted sum of the concentration indices of the regressors, where the weights are simply the elasticities associated with a percentage change in the explanatory variable  $\left( \frac{\beta_k \bar{x}_k}{\mu} \right)$  of  $y$  with respect to each  $x_k$ .

(Elasticity is a unit-free measure of (partial) association that is the percentage change in the dependent variable IADL or presence of chronic illness) The second is a residual, or ‘unexplained’, component. This reflects the inequality in health that cannot be explained by systematic variation in the  $x_k$  across socioeconomic groups. To do a decomposition analysis, the following steps are required:

- i. Regress the health variable against its determinants through an appropriate model. This results in finding the coefficients of the explanatory variables ( $\beta_k$ ).
- ii. Calculate the means of the health variable and each of its determinants ( $\mu$  and  $\bar{x}_k$ ).
- iii. Calculate the concentration indices for the health variable and for the determinants ( $C$  and  $C_k$ ) using Equation (1)—as well as the generalized CI of the error term ( $GC_e$ ). The CI of each determinant can be calculated using the Equation (1) where  $y_i$  and  $\mu$  are now the value of that determinant for the  $i^{\text{th}}$  individual and the determinant mean, respectively. At this stage, the values of all the variables included in Equation (3) are known.
- iv. Finally, the pure contribution of each determinant included in the model to the inequality in the health variable can be quantified through the following steps:
  - (a) Calculate the absolute contribution of each determinant by multiplying the health variable elasticity with respect to that determinant and its CI  $\left(\frac{\beta_k \bar{x}_k}{\mu}\right) C_k$
  - (b) Calculate the *percentage* contribution of each determinant simply through dividing its absolute contribution by the CI of the health variable  $\frac{\left(\frac{\beta_k \bar{x}_k}{\mu}\right) C_k}{C}$ .

Moreover, since the inequality in predicted ill-health will be described given the observed values of the X variable, attention is focused on the first term in the decomposition equation - the predicted inequality as measured by  $C_e$

$$c_{\bar{y}} = \sum_{k=1}^K \left( \frac{\beta_k \bar{x}_k}{\mu} \right) c_k \quad (4)$$

### *Ethics statement*

This study used the World Health Organization (WHO) Study on Global AGEing and Adult Health (SAGE) Wave 1 data available in the public domain, for use by researchers. Information on individual is available with all identifiers removed, thus no ethical clearance is required. Ethical clearance was obtained from local research review boards for each participating SAGE site, in addition to the WHO Ethical Review Committee. Informed consent was obtained from each respondent prior to enrolment.

### **Results**

**Table 1** presents the sample distribution of population aged 60 and above covered in SAGE survey. Nearly, three-fifth of the sample size belonged to the age group 60-69 years among both male and female. Over half of the women (54%) in the same were widowed as compared to just 11% among men. Every three out of four women in the sample did not attend any formal level of schooling, whereas the corresponding figure among men was 36%. Majority of older population resides in rural areas (70%). Tobacco use among men was 75% while it was 38% among women.

The decomposition analysis has been interpreted based on three components: mean, marginal effects and CIs. Negative CI for IADL (or functional deficiencies) indicates that inequality was concentrated among the poor, and positive CI for chronic diseases among the rich indicates the higher burden. Positive (negative) contributions of association can be interpreted by indicating that the total health inequality would be lower (higher) if that association had no

1  
2 impact on the health outcome (instead of that reflected in marginal effects). The contributions are  
3 a mixture of positives and negatives and then sum to 100. The positive percentages were adjusted  
4 on *pro rata* basis, to offset the negative percentages as the positive percentages exaggerate the  
5 importance of the determinants. Each health outcome analysis was trailed by a gender based  
6 comparison to comprehend if there were any real contrasts among the contributions of various  
7 social-demographic constituents amongst men and women in their more established life towards  
8 income health inequality.  
9  
10  
11  
12  
13  
14  
15  
16  
17  
18  
19

20 Results of the relative contribution of socio-demographic factors to functional  
21 deficiencies was highest among poor economic status (39 per cent), followed by illiteracy (23  
22 per cent) which collated to 61 per cent of total explained inequalities (**Table 2**). Findings show  
23 that nine selected covariates together explained 82 per cent of the total inequalities. Specific  
24 analysis in terms of sex highlights major contrasts, where the positive adjusted percentile  
25 contribution by poor economic status for male was 61.8 per cent, whereas it was negative for  
26 females and thus, adjusted on the pro-rata basis for other positive contribution factors. The  
27 highest percentile contribution in functional deficiencies among females was rural resident (50  
28 per cent), which is substantially low at 5 per cent among males. The second point of comparison  
29 is illiteracy, which was 27 per cent for males and only 0.1 per cent among females.  
30  
31  
32  
33  
34  
35  
36  
37  
38  
39  
40  
41  
42  
43

44 In case of chronic health condition (**Table 3**), about 93 per cent of the relative  
45 contribution of socio-demographic factors was together shared by three factors – poor economic  
46 status (42%), rural residence (31%) and illiteracy (20%). Sex wise comparison suggests that  
47 among both male and female, poor economic status (45% and 41%) contributed highest,  
48 followed by rural place of residence (31% and 27%) and illiteracy (18% and 22%) respectively.  
49 However, among females, the contribution of social groups (SCs/STs) was noticeable (9%).  
50  
51  
52  
53  
54  
55  
56  
57  
58  
59  
60

## Discussion

Although, health disparities by socioeconomic group have been firmly established with years of research, difference in functional ability and chronic health by sex remains inconclusive among older adults in low and middle-income countries. We believe that this is the first study on sex stratified decomposing socioeconomic inequality in functional deficiency and chronic illness among older adults in India.

The findings show pro-poor inequality in IADL (or functional) deficiency and pro-rich inequality in the presence of chronic health. Determinants such as poor economic status, illiteracy and rural residence were major contributors to overall IADL deficiency, and there is a similar pattern among men. However, in the case of women, rural residence, belonging to SCs/STs social groups and being Muslim contributed significantly to IADL deficiency. The findings further suggest that poor economic status, followed by rural residence and illiteracy contributed the highest in explaining overall inequality in chronic health. Available evidence from India and other low-and-middle income countries highlighted low economic status [20,21], poor education [22,23] and residential segregation [24–26], as key predictors of functional ability and presence of chronic health among older adults. But, hardly any study ever attempted to quantify the contribution of these factors.

About half of the inequality in functional deficiency and nearly 30 percent in case of chronic illness among women were contributed by place of residence. This could be explained in terms of excess engagement of women workforce participation in informal rural activities throughout their life as compared to urban women, coupled with widespread lower position of women. For instance, in rural areas, women contribute significantly as agricultural labourers and are involved in core household management tasks including livestock rearing, collection of firewood, fetching water etc. even in later life [27]. Their healthcare needs and nutritional

1  
2 requirements during childhood and adulthood have largely been neglected, along with lack of  
3 economic security, mobility, and poor social interactions within community [28]. The high  
4 contribution of rural areas in both IADL and chronic illness could also be due to inadequate  
5 healthcare infrastructure, poor accessibility and sub-standard quality of care [29,30]. This  
6 situation put women at a disproportionate disadvantage compared to their urban counterparts  
7 with better civic infrastructure, improved health facilities and regular check-ups. Thus, the  
8 combined effect of heavy physical activities and widespread gender neglect in health and  
9 nutrition put rural women at a higher risk of functional limitations during later life as compared  
10 to their urban counterparts.  
11  
12  
13  
14  
15  
16  
17  
18  
19  
20  
21  
22

23 The combined influence of social group (SCs/STs) and religion (Muslim) contributes to  
24 over 30 per cent of the inequality in IADL disability among women. There were similar  
25 observations by other Indian studies among older population, where particular social groups  
26 were more disadvantaged in health and healthcare [31]. Complex interactions exist between  
27 gender, social groups (castes) and religion in India where substantial inequality is present by  
28 gender, access to education, economic status, and social groups [32]. The SC/ST and Muslim  
29 population, particularly women, are disadvantaged socioeconomically compared to other social  
30 groups. Historically, they are socially excluded, illiterate and mainly engage in informal sectors  
31 or as agricultural labourers [32]. Thus, there is the likelihood of reporting physical deficiency  
32 among women belonging to these social and religious groups. However, more research is  
33 required to establish this fact, at least in the case of Muslim women. Although, in recent years  
34 many affirmative initiatives have been launched to ensure better education, occupation and  
35 livelihood opportunities to those belonging to SCs/STs, especially women, it is too early to  
36 expect any major change in such a short period.  
37  
38  
39  
40  
41  
42  
43  
44  
45  
46  
47  
48  
49  
50  
51  
52  
53  
54  
55  
56  
57  
58  
59  
60

1  
2  
3 Economic status was found to be the major contributor in explaining inequality in both  
4 IADL and chronic illness among older adults. However, sex stratified analysis suggests that  
5 household economic status was a major factor in both IADL and chronic illness among males.  
6  
7 But, in the case of women, household economic status and not IADL deficiency largely  
8 contributed to chronic illness. Earlier evidence supports these results and states that lack of  
9 economic support to older adults increases the likelihood of underutilization of healthcare  
10 services in case of any morbidity/illness [25]. Studies argue that when it comes to interaction  
11 between gender and wealth, Indian women are at a disadvantage due to the long history of  
12 patriarchal kinship and economic structure at the household level, which must have limited  
13 autonomy among women [33–35]. Studies have documented that women in South Asia are  
14 having restricted access to, and control over, resources within the household [32], have poor  
15 access to preventive and curative care as they are economically dependent on their husbands, or  
16 on the male heads of household [36] and are most vulnerable when healthcare has to be  
17 purchased out-of-pocket or through private insurance [37–39]. Resource-poor older individuals  
18 had lower use of healthcare despite their illness and this could be affecting women adversely  
19 considering the inadequate social protection plan, coupled with poor performance, specifically  
20 for the economically disadvantaged older people [40]. This was reflected in earlier studies too.  
21  
22  
23  
24  
25  
26  
27  
28  
29  
30  
31  
32  
33  
34  
35  
36  
37  
38  
39  
40

41 The strengths and limitations of the study need to be highlighted. The methodological  
42 strength of the present study included application of the concentration index. It is sensitive to  
43 changes in outcome distribution (IADL and chronic illness) of the population across  
44 socioeconomic groups. Another major strength of this study is the nationally representative  
45 sample of older population drawn from SAGE survey. SAGE is one of the prominent sources of  
46 data that provides a great amount health and related information pertaining to the older  
47 population in India. It has addressed major data gaps in terms of growing socioeconomic  
48  
49  
50  
51  
52  
53  
54  
55  
56  
57  
58  
59  
60



1  
2 inequalities in health in low and middle-income countries like India [14]. As far as the  
3  
4 limitations are concerned, first, the findings based on regression-based decomposition models  
5  
6 lack any causal interpretations between correlated and inequalities in health outcomes. Second,  
7  
8 the study does not include any variables related to psychosocial factors and the health system.  
9  
10  
11 Third, the cross-sectional study design prevents establishment of any causal inferences from the  
12  
13 study results.  
14  
15

16  
17  
18  
19 **Contributors:** LS and RKR contributed in conceptualising the study. LS, lead and corresponding  
20  
21 author, had full access to the data in the study and takes responsibility for the integrity of the data  
22  
23 and the accuracy of the data analysis. RKR and PKS contributed to the interpretation of the data,  
24  
25 and critically revised all versions of the manuscript and approved the final version.  
26  
27

28 **Competing interests:** None declared.  
29

30 **Funding:** This research received no specific grant from any funding agency in the public,  
31  
32 commercial or not-for-profit sectors.  
33  
34

35 **Data sharing statement:** The data sets used and/or analysed during this study are available from  
36  
37 the corresponding author on reasonable request.  
38  
39  
40  
41  
42  
43  
44  
45  
46  
47  
48  
49  
50  
51  
52  
53  
54  
55  
56  
57  
58  
59  
60

## References

- 1 Wray LA, Blaum CS. Explaining the role of sex on disability: a population-based study. *Gerontologist* 2001;**41**:499–510.
- 2 Barford A, Dorling D, Smith GD, *et al*. Life expectancy: women now on top everywhere: during 2006, even in the poorest countries, women can expect to outlive men. *BMJ Br Med J* 2006;**332**:808.
- 3 Oksuzyan A, Juel K, Vaupel JW, *et al*. Men: good health and high mortality. Sex differences in health and aging. *Aging Clin Exp Res* 2008;**20**:91.
- 4 Crimmins EM, Kim JK, Solé-Auró A. Gender differences in health: results from SHARE, ELSA and HRS. *Eur J Public Health* 2010;**21**:81–91.
- 5 Yount KM, Agree EM. Differences in disability among older women and men in Egypt and Tunisia. *Demography* 2005;**42**:169–87.
- 6 Ng N, Kowal P, Kahn K, *et al*. Health inequalities among older men and women in Africa and Asia: evidence from eight Health and Demographic Surveillance System sites in the INDEPTH WHO-SAGE study. *Glob Health Action* 2010;**3**:5420.
- 7 Deighton CM, Surtees D, Walker DJ. Influence of the severity of rheumatoid arthritis on sex differences in health assessment questionnaire scores. *Ann Rheum Dis* 1992;**51**:473–5.
- 8 Kandrack M-A, Grant KR, Segall A. Gender differences in health related behaviour: some unanswered questions. *Soc Sci Med* 1991;**32**:579–90.
- 9 Goli S, Singh L, Jain K, *et al*. Socioeconomic determinants of health inequalities among the older population in India: a decomposition analysis. *J Cross Cult Gerontol* 2014;**29**:353–69.
- 10 Rajan SI. Social assistance for poor elderly: How effective? *Econ Polit Wkly* 2001;:613–7.
- 11 Legato MJ, Johnson PA, Manson JE. Consideration of sex differences in medicine to

- 1  
2  
3 improve health care and patient outcomes. *Jama* 2016;**316**:1865–6.  
4  
5 12 Welfare M of H and F. National Health Policy 2017. 2017.  
6  
7 <https://mohfw.gov.in/sites/default/files/9147562941489753121.pdf>  
8  
9 13 Patel V, Chatterji S, Chisholm D, *et al.* Chronic diseases and injuries in India. *Lancet*  
10  
11 2011;**377**:413–28.  
12  
13  
14 14 Kowal P, Chatterji S, Naidoo N, *et al.* Data resource profile: the World Health  
15  
16 Organization Study on global AGEing and adult health (SAGE). *Int J Epidemiol*  
17  
18 2012;**41**:1639–49.  
19  
20  
21 15 Arokiasamy P, Parasuraman S, Sekher T V, *et al.* Study on global AGEing and adult  
22  
23 health (SAGE) Wave 1, India National Report. *Int Inst Popul Sci Geneva World Heal*  
24  
25 *Organ* 2013.  
26  
27  
28 16 Ferguson BD, Tandon A, Gakidou E, *et al.* Estimating permanent income using indicator  
29  
30 variables. *Heal Syst Perform Assess debates, methods empiricism Geneva World Heal*  
31  
32 *Organ* 2003;**7**:747–60.  
33  
34  
35 17 Wagstaff A, Paci P, Van Doorslaer E. On the measurement of inequalities in health. *Soc*  
36  
37 *Sci Med* 1991;**33**:545–57.  
38  
39  
40 18 Doorslaer E van, Koolman X. Explaining the differences in income-related health  
41  
42 inequalities across European countries. *Health Econ* 2004;**13**:609–28.  
43  
44  
45 19 Wagstaff A, Van Doorslaer E, Watanabe N. On decomposing the causes of health sector  
46  
47 inequalities with an application to malnutrition inequalities in Vietnam. *J Econom*  
48  
49 2003;**112**:207–23.  
50  
51 20 Vellakkal S, Subramanian S V, Millett C, *et al.* Socioeconomic inequalities in non-  
52  
53 communicable diseases prevalence in India: disparities between self-reported diagnoses  
54  
55 and standardized measures. *PLoS One* 2013;**8**:e68219.  
56  
57  
58  
59  
60

- 1  
2  
3 21 Roy K, Chaudhuri A. Influence of socioeconomic status, wealth and financial  
4 empowerment on gender differences in health and healthcare utilization in later life:  
5 evidence from India. *Soc Sci Med* 2008;**66**:1951–62.  
6  
7  
8  
9 22 Duda RB, Anarfi JK, Adanu RMK, *et al.* The health of the ‘older women’ in Accra,  
10 Ghana: results of the Women’s Health Study of Accra. *J Cross Cult Gerontol*  
11 2011;**26**:299–314.  
12  
13  
14  
15  
16 23 Zhang H, d’Uva TB, Van Doorslaer E. The gender health gap in China: A decomposition  
17 analysis. *Econ Hum Biol* 2015;**18**:13–26.  
18  
19  
20  
21 24 Basu S, King AC. Disability and chronic disease among older adults in India: detecting  
22 vulnerable populations through the WHO SAGE Study. *Am J Epidemiol* 2013;**178**:1620–  
23 8.  
24  
25  
26  
27  
28 25 Dhak B. Gender difference in health and its determinants in the old-aged population in  
29 India. *J Biosoc Sci* 2009;**41**:625–43.  
30  
31  
32 26 Zeki Al Hazzouri A, Mehio Sibai A, Chaaya M, *et al.* Gender differences in physical  
33 disability among older adults in underprivileged communities in Lebanon. *J Aging Health*  
34 2011;**23**:367–82.  
35  
36  
37  
38  
39 27 Singh L, Arokiasamy P, Singh PK, *et al.* Determinants of gender differences in self-rated  
40 health among older population: evidence from India. *Sage Open*  
41 2013;**3**:2158244013487914.  
42  
43  
44  
45  
46 28 Ghosh S, Husain Z. Economic independence, family support and perceived health status  
47 of elderly: Recent evidence from India. *Asia-Pacific Popul J* 2010;**25**:47–77.  
48  
49  
50  
51 29 Agarwal A, Lubet A, Mitgang E, *et al.* Population Aging in India: Facts, Issues, and  
52 Options. 2016.  
53  
54  
55  
56 30 Zhou B, Chen K, Wang J, *et al.* Quality of life and related factors in the older rural and  
57

- 1  
2  
3 urban Chinese populations in Zhejiang province. *J Appl Gerontol* 2011;**30**:199–225.
- 4  
5 31 Brinda EM, Attermann J, Gerdtham UG, *et al*. Socio-economic inequalities in health and  
6  
7 health service use among older adults in India: results from the WHO Study on Global  
8  
9 AGEing and adult health survey. *Public Health* 2016;**141**:32–41.
- 10  
11  
12 32 Iyer A, Sen G, Östlin P. The intersections of gender and class in health status and health  
13  
14 care. *Glob Public Health* 2008;**3**:13–24.
- 15  
16  
17 33 Caldwell JC. Routes to low mortality in poor countries. *Popul Dev Rev* 1986;:171–220.
- 18  
19 34 Gupta M Das. Life course perspectives on women’s autonomy and health outcomes. *Am*  
20  
21 *Anthropol* 1995;**97**:481–91.
- 22  
23  
24 35 Santow G. Social roles and physical health: the case of female disadvantage in poor  
25  
26 countries. *Soc Sci Med* 1995;**40**:147–61.
- 27  
28  
29 36 Schuler SR, Bates LM, Islam MDK. Paying for reproductive health services in  
30  
31 Bangladesh: intersections between cost, quality and culture. *Health Policy Plan*  
32  
33 2002;**17**:273–80.
- 34  
35  
36 37 Sen G, Östlin P. Gender inequity in health: why it exists and how we can change it. 2008.
- 37  
38  
39 38 Ravindran STK, Pinho H de. The right reforms? Health sector reforms and sexual and  
40  
41 reproductive health. In: *The right reforms? Health sector reforms and sexual and*  
42  
43 *reproductive health*. 2005.
- 44  
45  
46 39 Falkingham J. Poverty, out-of-pocket payments and access to health care: evidence from  
47  
48 Tajikistan. *Soc Sci Med* 2004;**58**:247–58.
- 49  
50  
51 40 Balarajan Y, Selvaraj S, Subramanian S V. Health care and equity in India. *Lancet*  
52  
53  
54  
55  
56  
57  
58  
59  
60 2011;**377**:505–15.

**Table 1.** SAGE India Sample Distribution for Population aged 60 and above (N=3753)

| Background Characteristics             | Males (N=1979) |      | Females (N=1774) |      | Total    |      |
|----------------------------------------|----------------|------|------------------|------|----------|------|
|                                        | <i>n</i>       | %    | <i>n</i>         | %    | <i>n</i> | %    |
| <b>Age of the respondent</b>           |                |      |                  |      |          |      |
| 60-64                                  | 615            | 30.0 | 613              | 33.8 | 1,228    | 31.9 |
| 65-69                                  | 589            | 29.3 | 500              | 25.8 | 1,089    | 27.5 |
| 70-74                                  | 395            | 21.2 | 335              | 20.1 | 730      | 20.6 |
| 75-79                                  | 206            | 11.8 | 153              | 9.0  | 359      | 10.4 |
| 80+                                    | 174            | 7.6  | 173              | 11.1 | 347      | 9.4  |
| <b>Marital Status</b>                  |                |      |                  |      |          |      |
| Unmarried                              | 32             | 1.5  | 9                | 1.2  | 36       | 1.4  |
| Married                                | 1660           | 87.8 | 812              | 44.7 | 2,477    | 66.1 |
| Widowed                                | 287            | 10.5 | 953              | 54.0 | 1,240    | 32.5 |
| <b>Education of the Respondent</b>     |                |      |                  |      |          |      |
| No formal education                    | 745            | 36.3 | 1320             | 75.6 | 2,149    | 56.2 |
| Less than primary                      | 317            | 12.9 | 159              | 9.6  | 446      | 11.2 |
| Completed primary                      | 341            | 19.5 | 161              | 8.9  | 494      | 14.2 |
| Completed secondary                    | 234            | 13.0 | 59               | 2.4  | 275      | 7.6  |
| Completed HS                           | 203            | 11.8 | 52               | 2.2  | 234      | 6.9  |
| Completed college/university/post grad | 139            | 6.3  | 23               | 1.1  | 155      | 3.7  |
| <b>Religion of the Respondent</b>      |                |      |                  |      |          |      |
| Hinduism                               | 1603           | 83.7 | 1473             | 86.9 | 3,076    | 85.3 |
| Islam                                  | 245            | 12.6 | 170              | 10.3 | 415      | 11.5 |
| Others                                 | 63             | 3.6  | 60               | 2.7  | 123      | 3.2  |
| <b>Ethnicity of the Respondent</b>     |                |      |                  |      |          |      |
| Scheduled Tribe                        | 114            | 5.4  | 73               | 4.5  | 187      | 5.0  |
| Scheduled Caste                        | 329            | 16.8 | 284              | 16.8 | 613      | 16.8 |
| No Caste or Tribe                      | 340            | 12.9 | 325              | 14.8 | 665      | 13.9 |
| Others                                 | 1122           | 64.8 | 1013             | 63.9 | 2,135    | 64.3 |
| <b>Place of Residence</b>              |                |      |                  |      |          |      |
| Urban                                  | 472            | 29.6 | 501              | 30.4 | 973      | 30.1 |
| Rural                                  | 1507           | 70.3 | 1273             | 69.5 | 2,780    | 69.9 |
| <b>Wealth Quintile</b>                 |                |      |                  |      |          |      |
| Poorest                                | 387            | 22.5 | 363              | 24.8 | 750      | 23.7 |
| Poor                                   | 403            | 22.6 | 344              | 21.9 | 747      | 22.3 |
| Middle                                 | 358            | 17.5 | 346              | 19.4 | 704      | 18.5 |
| Higher                                 | 382            | 17.5 | 309              | 15.9 | 691      | 16.8 |
| Highest                                | 381            | 19.7 | 341              | 17.7 | 722      | 18.8 |
| <b>Tobacco Use</b>                     |                |      |                  |      |          |      |
| No                                     | 523            | 24.7 | 1110             | 62.3 | 1,633    | 43.5 |
| Former/Current                         | 1387           | 75.2 | 592              | 37.6 | 1,979    | 56.5 |

**Table 2:** Gender Stratified Effects and Contribution of Predictor Variables based on Decomposition Analysis for IADL among Older Population aged 60 years and above, WHO-SAGE 2007-08

| Covariates    | Mean          | Beta    | CI             | Contribution to CI | % Contribution | Adjusted % Contribution |
|---------------|---------------|---------|----------------|--------------------|----------------|-------------------------|
| <b>Total</b>  |               |         |                |                    |                |                         |
| Poor          | 0.4142        | 0.1074  | -0.5799        | -0.0340            | 38.6483        | 38.5170                 |
| Tobacco       | 0.5479        | 0.0411  | -0.0634        | -0.0019            | 2.1393         | 2.1321                  |
| Illiterate    | 0.6796        | 0.1649  | -0.1344        | -0.0198            | 22.5606        | 22.4840                 |
| SC/ST         | 0.2222        | 0.0525  | -0.2490        | -0.0038            | 4.3492         | 4.3344                  |
| Muslim        | 0.1148        | 0.2793  | -0.1268        | -0.0054            | 6.0893         | 6.0686                  |
| Rural         | 0.7407        | 0.1564  | -0.1090        | -0.0166            | 18.9122        | 18.8480                 |
| Married       | 0.6539        | -0.2226 | 0.0292         | -0.0056            | 6.3588         | 6.3372                  |
| Older(70+)    | 0.3826        | 0.4741  | 0.0013         | 0.0003             | -0.3409        |                         |
| Female        | 0.4727        | 0.1719  | -0.0105        | -0.0011            | 1.2832         | 1.2788                  |
| <b>IADL</b>   | <b>0.7598</b> |         | <b>-0.1076</b> | <b>-0.0879</b>     | <b>100.0</b>   | <b>100.0</b>            |
| <b>Male</b>   |               |         |                |                    |                |                         |
| Poor          | 0.4134        | 0.2522  | -0.5780        | -0.0949            | 62.9016        | 61.8327                 |
| Tobacco       | 0.7262        | 0.0000  | -0.0548        | 0.0000             | 0.0003         |                         |
| Illiterate    | 0.5406        | 0.2334  | -0.2048        | -0.0407            | 26.9793        | 26.5208                 |
| SC/ST         | 0.2325        | -0.0295 | -0.2413        | 0.0026             | -1.7290        |                         |
| Muslim        | 0.1282        | 0.1145  | -0.1052        | -0.0024            | 1.6120         | 1.5846                  |
| Rural         | 0.7615        | 0.0623  | -0.1047        | -0.0078            | 5.1789         | 5.0909                  |
| Married       | 0.8388        | -0.2003 | 0.0130         | -0.0034            | 2.2837         | 2.2449                  |
| Older(70+)    | 0.3916        | 0.4016  | -0.0169        | -0.0042            | 2.7732         | 2.7261                  |
| <b>IADL</b>   | <b>0.6347</b> |         | <b>-0.1872</b> | <b>-0.1509</b>     | <b>100.0</b>   | <b>100.0</b>            |
| <b>Female</b> |               |         |                |                    |                |                         |
| Poor          | 0.4151        | -0.0566 | -0.5820        | 0.0152             | -45.3771       |                         |
| Tobacco       | 0.3478        | 0.0699  | -0.0941        | -0.0025            | 7.5951         | 4.7415                  |
| Illiterate    | 0.8356        | 0.0010  | -0.0803        | -0.0001            | 0.2262         | 0.1412                  |
| SC/ST         | 0.2106        | 0.1452  | -0.2592        | -0.0088            | 26.3168        | 16.4289                 |
| Muslim        | 0.0998        | 0.5090  | -0.1608        | -0.0091            | 27.1160        | 16.9279                 |
| Rural         | 0.7176        | 0.2896  | -0.1153        | -0.0266            | 79.5168        | 49.6405                 |
| Married       | 0.4476        | -0.2436 | 0.0536         | -0.0065            | 19.4146        | 12.1201                 |
| Older(70+)    | 0.3726        | 0.5512  | 0.0217         | 0.0050             | -14.8083       |                         |
| <b>IADL</b>   | <b>0.9001</b> |         | <b>-0.0420</b> | <b>-0.0335</b>     | <b>100.0</b>   | <b>100.0</b>            |

**Table 3:** Gender Stratified Effects and Contribution of Predictor Variables based on Decomposition Analysis for Presence of Chronic Disease of all the Older Population aged 60 years and above, WHO-SAGE 2007-08

| Covariates                         | Mean          | Beta    | CI            | Contribution to CI | % Contribution | Adjusted % Contribution |
|------------------------------------|---------------|---------|---------------|--------------------|----------------|-------------------------|
| <b>Total</b>                       |               |         |               |                    |                |                         |
| Poor                               | 0.4142        | -0.1129 | -0.5799       | 0.0629             | 42.6012        | 42.2482                 |
| Tobacco                            | 0.5479        | 0.0153  | -0.0634       | -0.0012            | -0.8357        |                         |
| Illiterate                         | 0.6796        | -0.1427 | -0.1344       | 0.0302             | 20.4715        | 20.3018                 |
| SC/ST                              | 0.2222        | -0.0705 | -0.2490       | 0.0090             | 6.1249         | 6.0741                  |
| Muslim                             | 0.1148        | -0.0285 | -0.1268       | 0.0010             | 0.6508         | 0.6454                  |
| Rural                              | 0.7407        | -0.2423 | -0.1090       | 0.0454             | 30.7336        | 30.4789                 |
| Married                            | 0.6539        | 0.0051  | 0.0292        | 0.0002             | 0.1524         | 0.1511                  |
| Older(70+)                         | 0.3826        | 0.0908  | 0.0013        | 0.0001             | 0.0685         | 0.0679                  |
| Female                             | 0.4727        | -0.0042 | -0.0105       | 0.0000             | 0.0328         | 0.0325                  |
| <b>Presence of Chronic Disease</b> | <b>0.4311</b> |         | <b>0.1509</b> | <b>0.1477</b>      | <b>100.0</b>   | <b>100.0</b>            |
| <b>Male</b>                        |               |         |               |                    |                |                         |
| Poor                               | 0.4134        | -0.1187 | -0.5780       | 0.0627             | 45.7501        | 45.0346                 |
| Tobacco                            | 0.7262        | -0.0056 | -0.0548       | 0.0005             | 0.3567         | 0.3512                  |
| Illiterate                         | 0.5406        | -0.1041 | -0.2048       | 0.0255             | 18.5924        | 18.3016                 |
| SC/ST                              | 0.2325        | -0.0337 | -0.2413       | 0.0042             | 3.0454         | 2.9978                  |
| Muslim                             | 0.1282        | -0.0740 | -0.1052       | 0.0022             | 1.6098         | 1.5846                  |
| Rural                              | 0.7615        | -0.2473 | -0.1047       | 0.0436             | 31.7806        | 31.2836                 |
| Married                            | 0.8388        | 0.0258  | 0.0130        | 0.0006             | 0.4537         | 0.4466                  |
| Older (70+)                        | 0.3916        | 0.1489  | -0.0169       | -0.0022            | -1.5887        |                         |
| <b>Presence of Chronic Disease</b> | <b>0.4522</b> |         | <b>0.1400</b> | <b>0.1371</b>      | <b>100.0</b>   | <b>100.0</b>            |
| <b>Female</b>                      |               |         |               |                    |                |                         |
| Poor                               | 0.4151        | -0.1145 | -0.5820       | 0.0679             | 42.5976        | 41.1463                 |
| Tobacco                            | 0.3478        | 0.0357  | -0.0941       | -0.0029            | -1.7993        |                         |
| Illiterate                         | 0.1450        | -0.2257 | -0.0803       | 0.0372             | 23.3234        | 22.5288                 |
| SC/ST                              | 0.2106        | -0.1103 | -0.2592       | 0.0148             | 9.2683         | 8.9525                  |
| Muslim                             | 0.0998        | 0.0342  | -0.1608       | -0.0013            | -0.8443        |                         |
| Rural                              | 0.7176        | -0.2206 | -0.1153       | 0.0448             | 28.0940        | 27.1369                 |
| Married                            | 0.4476        | -0.0239 | 0.0536        | -0.0014            | -0.8835        |                         |
| Older (70+)                        | 0.3726        | 0.0196  | 0.0217        | 0.0004             | 0.2437         | 0.2354                  |
| <b>Presence of chronic disease</b> | <b>0.4076</b> |         | <b>0.1635</b> | <b>0.1594</b>      | <b>100.0</b>   | <b>100.0</b>            |



# BMJ Open

## Socioeconomic Inequality in Functional Deficiencies and Chronic Diseases among Older Indian Adults: A Sex-stratified Cross-sectional Decomposition Analysis

|                                 |                                                                                                                                                                                                                                                                                    |
|---------------------------------|------------------------------------------------------------------------------------------------------------------------------------------------------------------------------------------------------------------------------------------------------------------------------------|
| Journal:                        | <i>BMJ Open</i>                                                                                                                                                                                                                                                                    |
| Manuscript ID                   | bmjopen-2018-022787.R1                                                                                                                                                                                                                                                             |
| Article Type:                   | Research                                                                                                                                                                                                                                                                           |
| Date Submitted by the Author:   | 27-Sep-2018                                                                                                                                                                                                                                                                        |
| Complete List of Authors:       | Singh, Lucky; National Institute of Medical Statistics, Goel, Richa; Centre for Catalyzing Change Rai, Rajesh Kumar; Society for Health and Demographic Surveillance, Singh, Prashant Kumar; National Institute of Cancer Prevention and Research, Division of Preventive Oncology |
| <b>Primary Subject Heading</b>: | Public health                                                                                                                                                                                                                                                                      |
| Secondary Subject Heading:      | Global health, Epidemiology                                                                                                                                                                                                                                                        |
| Keywords:                       | functional deficiency, chronic diseases, gender, older adults, India                                                                                                                                                                                                               |
|                                 |                                                                                                                                                                                                                                                                                    |

SCHOLARONE™  
Manuscripts

**Title Page****Socioeconomic Inequality in Functional Deficiencies and Chronic Diseases among Older Indian Adults: A Sex-stratified Cross-sectional Decomposition Analysis****Authors**

Lucky SINGH<sup>1,\*</sup>, Richa GOEL<sup>2</sup>, Rajesh Kumar RAI<sup>3</sup> and Prashant Kumar SINGH<sup>4</sup>

**Keywords:** functional deficiency, chronic diseases, gender, older adults, India

**Word count:** 3673 (excluding title page, abstract, references, figures and tables)

---

*First and corresponding author*

<sup>1</sup>**Lucky Singh**, PhD

*Scientist 'C'*

Indian Council of Medical Research – National Institute of Medical Statistics

Ansari Nagar, New Delhi 110029, India

Email: [lucky.5bhu@gmail.com](mailto:lucky.5bhu@gmail.com)

<sup>2</sup>**Richa Goel**, MA

*Consultant*

Centre for Catalyzing Change

C-1, HauzKhas, New Delhi – 110016

Email: [richa\\_731@yahoo.com](mailto:richa_731@yahoo.com)

<sup>3</sup>**Rajesh Kumar Rai**, MPH

*Senior Research Scientist*

Society for Health and Demographic Surveillance

Suri, Birbhum 731101, West Bengal, India

Email: [rajesh.iips28@gmail.com](mailto:rajesh.iips28@gmail.com)

<sup>4</sup>**Prashant Kumar Singh**, PhD

*Scientist 'D' (Population Studies)*

Division of Preventive Oncology, Indian Council of Medical Research – National Institute of Cancer Prevention and Research

Noida, Uttar Pradesh 201301, India

Email: [prashants.geo@gmail.com](mailto:prashants.geo@gmail.com)

## Socioeconomic Inequality in Functional Deficiencies and Chronic Diseases among Older Indian Adults: A Sex-stratified Cross-sectional Decomposition Analysis

**Word count:** 3673 (excluding title page, abstract, references, figures and tables)

### Abstract

**Objectives:** The elderly with adverse socioeconomic conditions suffer disproportionately from poor quality of life. Stratified by sex, this study decomposes income-related inequalities for functional deficiencies and chronic diseases among older adults, and identifies the degree to which social and demographic factors contribute to these inequalities.

**Design:** Cross-sectional study.

**Participants:** Data used for this study were retrieved from the World Health Organization (WHO) Study on Global AGEing and Adult Health (SAGE) Wave 1. A total of 3753 individuals (male: 1979; and female: 1774) aged  $\geq 60$  years were found eligible for the analysis.

**Measures:** Functional deficiency and presence of chronic diseases.

**Method:** The decomposition method proposed by Adam Wagstaff and his colleagues was used. The method allows estimating how determinants of health proportionally contribute to inequality in a health variable.

**Results:** Compared to males, females were disproportionately affected by both functional deficiencies and chronic diseases. The relative contribution of socio-demographic factors to functional deficiencies was highest among those with poor economic status (38.5%), followed by those who were illiterate (22.5%), which collated to 61 percent to the total explained inequalities. Similarly, for chronic diseases, about 93 percent of the relative contribution was shared by those with poor economic status (42.3%), rural residence (30.5%) and illiteracy (20.3%).

**Conclusion:** Pro-poor intervention strategies could be designed to address functional deficiencies and chronic diseases, with special attention to women.

**Keywords:** functional deficiency, chronic diseases, gender, older adults, India

### Strengths and Limitations of this Study

- This study, the first of its kind, examines the decomposition of socioeconomic inequality in functional deficiency and chronic illness separately for males and females, among the older population.
- The findings revealed pro-poor inequality in Instrumental Activity of Daily Living (IADL) deficiency and pro-rich inequality in the presence of chronic diseases among both older men and women in India.
- Poor economic status, illiteracy and rural residence were major contributors to overall IADL deficiency among men.
- The cross-sectional study design prevents establishment of any causal inferences from the study results.

## Introduction

Globally, older females experience lower mortality rates and in a few cases, lower prevalence of chronic diseases as compared to their male counterparts [1–4]. Contrary to this, functional limitation and physical disability among women has been higher than that among men, particularly in low and middle income countries [5,6]. Existing evidence shows that the difference in male-female functional limitation could be explained in terms of higher prevalence and severity of arthritis and musculoskeletal disease [4,7] among women along with psychosocial factors – women are more likely to over-report ill health and functional limitations, whereas men would under-report their weaknesses [8]. This pattern may be more evident in low-and-middle income countries where gender norms significantly determine demographic, health and socioeconomic outcomes.

Examining disparities in socioeconomic status and their effect on health outcomes in developing societies is high on the list of priorities in the global agenda. A study has shown that poor economic status contributes to over half of the inequality in self-rated health among older adults in India, followed by illiteracy and rural residence [9]. However, the distribution of socioeconomic resources between men and women is not the same, which gives rise to different explanations for the existing socioeconomic inequalities in health by gender. Of the total elderly population in India, nearly half of the Indian elderly, mostly women are dependents, often due to widowhood, divorce, or separation [10]. The majority of elderly women are deprived of economic security and receive poor healthcare [10]. If results for male and female participants are not studied separately, aggregate results may mask imperative disparities in the mechanism of functional deficiency and chronic diseases [11].

Stratified by sex, this study decomposes income-related inequalities for functional deficiencies and chronic diseases among older adults, and identifies the degree to which social and demographic determinants contribute to these inequalities.

This study has the following objectives:

1. To examine the differences in functional deficiency and chronic diseases among older men and women separately

- 2
  - 3
  - 4
  - 5
  - 6
  - 7
  - 8
  - 9
  - 10
  - 11
  - 12
  - 13
  - 14
  - 15
  - 16
  - 17
  - 18
  - 19
  - 20
  - 21
  - 22
  - 23
  - 24
  - 25
  - 26
  - 27
  - 28
  - 29
  - 30
  - 31
  - 32
  - 33
  - 34
  - 35
  - 36
  - 37
  - 38
  - 39
  - 40
  - 41
  - 42
  - 43
  - 44
  - 45
  - 46
  - 47
  - 48
  - 49
  - 50
  - 51
  - 52
  - 53
  - 54
  - 55
  - 56
  - 57
  - 58
  - 59
  - 60
2. To estimate the relative contribution of socioeconomic and demographic factors to the overall functional deficiencies and chronic diseases, separately among men and women.

This study hopes to collate and analyze data to prepare and design programmes to improve the functional capacity and management of chronic diseases among the elderly in India. The National Health Policy (NHP) of India, 2017 acknowledges the healthcare needs of the aging population in India and recommends focused interventions [12] to tackle the rising burden of functional deficiency and chronic diseases [13].

## Methods

### *Study Population*

Data required for this study were retrieved from the World Health Organization (WHO) Study on Global AGEing and Adult Health (SAGE) Wave 1, collected between 2007 and 2010 in India. SAGE is a nationally representative multi-country (China, Ghana, India, Mexico, Russian Federation, and South Africa) study to monitor the health and well-being of adult populations aged 50 years and older [14]. In India, respondents were selected from six states – Assam, Karnataka, Maharashtra, Rajasthan, Uttar Pradesh, and West Bengal using a multistage, stratified, random sampling design with every individual having a known non-zero probability of being selected. Overall, the individual response rate was 92 percent. More about the sampling process and SAGE India survey can be obtained from the published official report [14,15]. This study followed the United Nation's agreed cut-off age for defining older population (60 years and older). A total sample of 3,753 individuals (male: 1979; and female: 1774) aged 60 years and older were included.

### *Functional Deficiency and Chronic Disease*

Two health outcome events, functional deficiency and presence of chronic diseases, were analyzed. Functional deficiency was measured in terms of Instrumental Activity of Daily Living (IADL). IADL measures the ability to perform relatively complex activities of daily living [16]. Studies have identified a hierarchical structure within the disablement process model from health to disability, and concluded that the first level of disability includes persons with only mobility impairment [17]. The next level in the progression includes those with impairment in mobility

1  
2  
3 plus a limitation in an IADL. Finally, level three includes those with mobility, IADL, and basic  
4 difficulties in daily activities [17,18]. Although, IADL may not assess functional limitation in  
5 basic tasks such as sitting or standing for a long period, bathing, dressing and so on, it provides a  
6 basic understanding of the onset of functional difficulties among older adults [19]. In the WHO-  
7 SAGE survey, IADL is composed of five items that cover higher-level instrumental tasks [15].  
8 The respondents were asked if they had any difficulty doing the following instrumental tasks  
9 during the thirty days preceding the survey:  
10  
11  
12  
13

- 14 1. ...in taking care of your household responsibilities?
- 15
- 16 2. ...in joining community activities (for example, festivities, religious or other activities) in  
17 the same way as anyone else can?
- 18
- 19 3. ...in your day to day work
- 20
- 21 4. ...in reaching your destination, using private or public transport if needed?
- 22
- 23 5. ...in getting out of your home?
- 24
- 25
- 26
- 27
- 28
- 29
- 30

31 The responses were categorized into 'none', 'mild', 'moderate', 'severe', and 'extreme'/'cannot  
32 do'. For this study, the responses were grouped into different difficulty levels –  
33

- 34 • No difficulty (when the response was none or mild or moderate=0)
- 35
- 36 • Difficulty (when the response was severe or extreme=1).
- 37
- 38
- 39
- 40

41 The computed value of the sum of dichotomized five variables ranges from 0 to 5, where the  
42 higher score indicates poor physical functioning.  
43

44 Besides IADL, respondents were asked if they were diagnosed with any of the following chronic  
45 medical conditions (as conveyed by a health care professional that they had the given health  
46 condition): angina, asthma, stroke, depression, chronic lung disease and hypertension. An  
47 affirmative response regarding any of these medical conditions confirmed the presence of  
48 chronic disease.  
49  
50  
51  
52  
53  
54  
55  
56  
57  
58  
59  
60

### ***Covariates***

Guided by existing literature, individual and household level binary (1 or 0) covariates that could explain maximum dimensions of inequality were considered. The covariates are sex of the respondent (male or female), current marital status (married or unmarried), social group (Scheduled Caste/Scheduled Tribe or Non-scheduled Caste/Tribe), religion (Muslim or Others), education of the respondent (illiterate or literate), economic status (poor or non-poor), residence (rural or urban) and tobacco use (never, and ever or current). In dichotomous covariates, the assigned value, '1' represents the older population in a disadvantaged socioeconomic group, and the assigned value of '0' indicates the older population in an advantageous position.

The critical role of marital status for a woman in Indian society has been documented not only in terms of lower access to material resources, but also her own social position within-and-outside the family [20]. Studies from India [21] and elsewhere [22] show that both objective and subjective health measures along with healthcare use are substantially lower among older widowed women than among their married counterparts [23,24].

Previous literature suggests the protective effect of education on an individual's health, which operates in several ways. For instance, education may positively affect health through postponing the onset of functional limitations and chronic conditions [25], improve health through better management of illnesses, and enhance individual capability to cope with negative emotions [26]. Considering fewer resources, such as power, authority, earnings, household income, and wealth among women, the role of education appears to be vital in explaining women's health in low-and-middle income countries like India [27,28]. Among lifestyle factors physical inactivity, unhealthy diet, consumption of alcohol and use of tobacco have been found to be prominent risk factors for non-communicable diseases [29,30]. In India, smoking is higher among men and they smoke throughout their lives. Women smoke less than men but tend to become smokers at an older age [31,32].

Over 70 percent of the population lives in rural areas in India. Owing to variations in social experience, healthcare, pension policies, state provisions, rural and urban differences in health among older adults are critical. Moreover, with the increase of rural to urban migration among



the young population for better education, employment and living opportunities, the older population left behind in rural areas is at risk [33].

Historically, Scheduled Castes and Scheduled Tribes are identified by the Government of India as socially and economically backward social groups and considered to be in need of protection from social injustice and exploitation, whereas non-Scheduled Caste/Tribes enjoy a higher status in the social group hierarchy. Economic groups (poor or non-poor) were derived from the household wealth index provided in the dataset by using the WHO standard approach to estimate income from selected indicator variables [34]. For the decomposition analysis, the top two quintiles (representing 40% of economic status) were grouped as non-poor, and the bottom three quintiles (representing 60% of economic status) were combined as poor.

### *Analytical Approach*

Stratified by sex, a decomposition analysis was conducted to measure the contribution of select covariates to explain the burden of IADL and presence of chronic diseases in several steps. First, the Concentration Index (CI) was estimated to quantify the degree of socioeconomic-related inequality in the health variable [35], IADL and chronic diseases. It can be computed as twice the (weighted) covariance of the health variable and individual's relative rank in the economic gradient, divided by the variable mean according to Equation (1) [36]. The value of the CI ranges between -1 and +1, where negative values explain a variable that is concentrated among disadvantaged people and positive values indicate the opposite. In the absence of inequality, the CI will be zero [35].

$$C = \frac{2}{\mu} \text{cov}_w(y_i, R_i) \quad (1)$$

where  $y_i$  and  $R_i$  are, respectively, the health status of the  $i^{\text{th}}$  individual and the fractional rank of the  $i^{\text{th}}$  individual (for weighted data) in terms of the index of household economic status;  $\mu$  is the (weighted) mean of the health of the sample and  $\text{cov}_w$  denotes the weighted covariance.

The method proposed by Wagstaff and colleagues (2003) [37] was used to decompose socioeconomic inequality in poor health into its determinants. This analysis allows estimating how determinants proportionally contribute to inequality in a health variable. They have showed

that for any linear regression model, link the health variable of interest,  $y$ , to a set of  $k$  health determinants,  $x_k$ :

$$y_i = \alpha + \sum_{k=1} \beta_k x_{ki} + \varepsilon_i \quad (2)$$

Where  $\varepsilon$  is an error term. Given the relationship between  $y_i$  and  $x_{ki}$  in Equation (2), the CI for  $y$  (C) can be written as:

$$C = \sum_{k=1} \left( \frac{\beta_k \bar{x}_k}{\mu} \right) C_k + \frac{GC_\varepsilon}{\mu} = C_y + \frac{GC_\varepsilon}{\mu}, \quad (3)$$

Where  $\mu$  is the mean of  $y$ ,  $\bar{x}_k$  is the mean of  $x_k$ ,  $C_k$  is the CI for  $x_k$  (defined analogously to C). In the last term (which can be computed as a residual),  $GC_\varepsilon$  is the generalized concentration index for  $\varepsilon_i$ .

Equation (3) shows that C can be thought of as being made up of two components. The first is the deterministic, or ‘explained’, component. This is equal to a weighted sum of the concentration indices of the regressors, where the weights are simply the elasticities associated with a percentage change in the explanatory variable)  $\left( \frac{\beta_k \bar{x}_k}{\mu} \right)$  of  $y$  with respect to each  $x_k$ . (Elasticity is a unit-free measure of (partial) association that is the percentage change in the dependent variable IADL or presence of chronic illness) The second is a residual, or ‘unexplained’, component. This reflects the inequality in health that cannot be explained by systematic variation in the  $x_k$  across socioeconomic groups. To do a decomposition analysis, the following steps are required:

- i. Regress the health variable against its determinants through an appropriate model. This results in finding the coefficients of the explanatory variables ( $\beta_k$ ).
- ii. Calculate the means of the health variable and each of its determinants ( $\mu$  and  $\bar{x}_k$ ).
- iii. Calculate the concentration indices for the health variable and for the determinants (C and  $C_k$ ) using Equation (1)—as well as the generalized CI of the error term ( $GC_\varepsilon$ ). The CI of each determinant can be calculated using the Equation (1) where  $y_i$  and  $\mu$  are now the

value of that determinant for the  $i^{\text{th}}$  individual and the determinant mean, respectively. At this stage, the values of all the variables included in Equation (3) are known.

iv. Finally, the pure contribution of each determinant included in the model to the inequality in the health variable can be quantified through the following steps:

(a) Calculate the absolute contribution of each determinant by multiplying the health variable elasticity with respect to that determinant and its CI  $\left(\frac{\beta_k \bar{x}_k}{\mu}\right) C_k$

(b) Calculate the *percentage* contribution of each determinant simply through dividing its absolute contribution by the CI of the health variable  $\frac{\left(\frac{\beta_k \bar{x}_k}{\mu}\right) C_k}{C}$ .

Moreover, since the inequality in predicted ill-health will be described given the observed values of the X variable, attention is focused on the first term in the decomposition equation - the predicted inequality as measured by  $C_y$

$$C_y = \sum_{k=1} \left(\frac{\beta_k \bar{x}_k}{\mu}\right) C_k \quad (4)$$

### **Ethics Statement**

This study used the World Health Organization (WHO) Study on Global AGEing and Adult Health (SAGE) Wave 1 data available in the public domain for use by researchers, thus no ethical clearance is required for this study. Ethical clearance was obtained from local research review boards for each participating SAGE site, in addition to the WHO Ethical Review Committee. Informed consent was obtained from each respondent prior to enrolment.

### **Results**

**Table 1** presents the sample distribution of population aged 60 and above covered in SAGE survey. Nearly, three-fifth of the sample size belonged to the age group 60-69 years among both male and female. Over half of the women (54%) were widowed as compared to just 11 percent among men. Every three out of four women in the sample did not attend any formal level of schooling, whereas the corresponding figure among men was 36 percent. Majority of older population resides in rural areas (70%). Tobacco use among men was 75 percent, while it was 38 percent among women.

1  
2  
3 The decomposition analysis has been interpreted based on three components: mean, marginal  
4 effects and CIs. Negative CI for IADL (or functional deficiencies) indicates that inequality was  
5 concentrated among the poor, and positive CI for chronic diseases among the rich, which  
6 indicates a higher burden. Positive (negative) contributions of association can be interpreted by  
7 indicating that the total health inequality would be lower (higher) if that association had no  
8 impact on the health outcome (instead of that reflected in marginal effects). The contributions are  
9 a mixture of positives and negatives, and then sum up to 100. The positive percentages were  
10 adjusted on *pro rata* basis to offset the negative percentages, as the positive percentages  
11 exaggerate the importance of the determinants. Each health outcome analysis was trailed by a  
12 gender-based comparison to comprehend if there were any real contrasts among the contributions  
13 of various social-demographic constituents amongst men and women in their income health  
14 inequality.

15  
16  
17  
18  
19  
20  
21  
22  
23  
24 Results of the relative contribution of sociodemographic factors to functional deficiencies were  
25 highest among those with a poor economic status (39 per cent), followed by those who were  
26 illiterate (23 per cent), which collated to 61 percent of total explained inequalities (**Table 2**).  
27 Findings show that nine selected covariates together explained 82 percent of the total  
28 inequalities. Specific analysis in terms of sex highlights major contrasts, where the positive  
29 adjusted percentile contribution by poor economic status for males was 61.8 percent, whereas it  
30 was negative for females and thus, adjusted on the *pro rata* basis for the other positive  
31 contribution factors. The highest percentile contribution in functional deficiencies among  
32 females was rural resident (50 per cent), which was substantially low at 5 percent among males.  
33 The second point of comparison was illiteracy, which was 27 percent for males and only 0.1  
34 percent for females. Among females, Muslims accounted for 17 percent of the total inequality in  
35 functional deficiency and SC/ST social groups, another 16 percent.

36  
37  
38  
39  
40  
41  
42  
43  
44  
45  
46 In case of chronic health condition (**Table 3**), about 93 percent of the relative contribution of  
47 socio-demographic factors was shared by three factors – poor economic status (42%), rural  
48 residence (31%) and illiteracy (20%). Sex wise comparison suggests that among both male and  
49 female, poor economic status (45% and 41%) contributed the highest, followed by rural place of  
50 residence (31% and 27%) and illiteracy (18% and 22%) respectively. However, among females,  
51 the contribution of social groups (SCs/STs) was noticeable (9%).

## Discussion and Conclusion

Although, health disparities by socioeconomic group have been firmly established with years of research, difference in functional ability and chronic health by sex remains inconclusive among older adults in low and middle-income countries. We believe that this is the first study on sex stratified decomposing socioeconomic inequality in functional deficiency and chronic illness among older adults in India.

The findings show pro-poor inequality in IADL (or functional) deficiency and pro-rich inequality in the presence of chronic illness among older adults sample. Determinants such as poor economic status, illiteracy and rural residence were major contributors to overall IADL deficiency, and there is a similar pattern among men. However, in the case of women, rural residence, belonging to SCs/STs social groups, and being Muslim contributed significantly to IADL deficiency. The findings further suggest that poor economic status, followed by rural residence and illiteracy contributed the highest in explaining overall inequality in chronic health. Available evidence from India and other low and middle income countries highlighted low economic status [27,38], poor education [39,40] and residential segregation [41–43], as key predictors of functional ability and presence of chronic health among older adults. But, hardly any study ever attempted to quantify the contribution of these factors.

Place of residence contributed to about 50 percent of the inequality in functional deficiency and nearly 30 percent in case of chronic illness among women. This could perhaps be attributed to excess engagement of women workforce participation in informal rural activities throughout their life as compared to urban women. For instance, in rural areas, women contribute significantly as agricultural labourers and are involved in core household management tasks including livestock rearing, collection of firewood and fetching water even in later life [44]. Their healthcare needs and nutritional requirements during childhood and adulthood have largely been neglected, along with lack of economic security, mobility, and poor social interactions within community [45]. The high contribution of rural areas in both IADL and chronic illness could be due to inadequate healthcare infrastructure, poor accessibility and sub-standard quality of care [46,47]. This situation put women at a disproportionate disadvantage compared to their urban counterparts with better civic infrastructure, improved health facilities and regular check-

1  
2  
3 ups. Thus, the combined effect of heavy physical activities and widespread gender neglect in  
4 health and nutrition put rural women at a higher risk of functional limitations during later life as  
5 compared to their urban counterparts.  
6  
7

8  
9 The combined influence of social group (SCs/STs) and religion (Muslim) contributes to over 30  
10 percent of the inequality in IADL disability among women. There were similar observations by  
11 other Indian studies among older population, where particular social groups were more  
12 disadvantaged in health and healthcare [48]. Complex interactions exist between social groups  
13 (castes) and religion in India where substantial inequality is present by gender, access to  
14 education, economic status, and social groups [49]. The SC/ST and Muslim population,  
15 particularly women, are disadvantaged socioeconomically compared to other social groups.  
16 Historically, they are socially excluded, illiterate and mainly engage in the informal sectors or as  
17 agricultural labourers [49]. Thus, there is the likelihood of reporting physical deficiency among  
18 women belonging to these social and religious groups. However, more research is required to  
19 establish this fact, at least in the case of Muslim women. Although, in recent years many  
20 affirmative initiatives have been launched to ensure better education, occupation and livelihood  
21 opportunities to those belonging to SCs/STs, especially women, it is too early to expect any  
22 major change.  
23  
24  
25  
26  
27  
28  
29  
30  
31  
32  
33

34  
35 Economic status was found to be the major contributor in explaining inequality in both IADL  
36 and chronic illness among older adults. However, sex stratified analysis suggests that household  
37 economic status was a major factor in both IADL and chronic illness among males. But, in the  
38 case of women, household economic status and not IADL deficiency contributed to chronic  
39 illness. Earlier evidence supports these results and states that lack of economic support to older  
40 adults increases the likelihood of underutilization of healthcare services in case of any  
41 morbidity/illness [42]. Studies argue that when it comes to interaction between gender and  
42 wealth, Indian women are at a disadvantage due to the long history of patriarchal kinship and  
43 economic structure at the household level, which must have limited autonomy among women  
44 [50–52]. Studies have documented that women in South Asia have restricted access to, and  
45 control over, resources within the household [49], poor access to preventive and curative care as  
46 they are economically dependent on their husbands or on the male heads of household [53] and  
47 are most vulnerable when healthcare has to be purchased out-of-pocket or through private  
48  
49  
50  
51  
52  
53  
54  
55  
56  
57

1  
2  
3 insurance [54–56]. Resource-poor older individuals had lower use of healthcare despite their  
4 illness and this could be affecting women adversely considering the inadequate social protection  
5 plan, coupled with poor performance, specifically for the economically disadvantaged older  
6 people [57]. This was reflected in earlier studies too.  
7  
8  
9

### 10 11 **Strengths and Limitations**

12  
13 The strengths and limitations of the study need to be highlighted. The methodological strength of  
14 the present study includes application of the concentration index. It is sensitive to changes in  
15 outcome distribution (IADL and chronic illness) of the population across socioeconomic groups.  
16 Also, the application of decomposition analysis [37] to examine the contribution of  
17 socioeconomic factors to the overall health inequality between the poor and the rich strengthens  
18 the findings of this study. Another major strength of this study is the nationally representative  
19 sample of older population drawn from the SAGE survey. SAGE is one of the prominent sources  
20 of data that provides a great amount of health and related information pertaining to the older  
21 population in India. It has addressed major data gaps in terms of growing socioeconomic  
22 inequalities in health in low and middle income countries like India [14]. The study has used  
23 diagnosed chronic morbidity rather than reported to reduce any bias in the responses.  
24  
25  
26  
27  
28  
29  
30  
31  
32

33  
34 As far as the limitations are concerned, first, the findings based on regression-based  
35 decomposition models lack any causal interpretations. Second, the study does not include any  
36 variables related to psychosocial factors and the health system, which might explain both  
37 functional limitations and chronic illness among older adults. Third, the cross-sectional study  
38 design prevents establishment of any causal inferences from the study results. Finally, health  
39 measures could have been affected by the type and composition of individual's social network  
40 [33], has not been considered in this analysis.  
41  
42  
43  
44  
45  
46  
47  
48  
49  
50  
51  
52  
53  
54  
55  
56  
57  
58  
59  
60

1  
2  
3 **Contributors:** LS and PKS contributed in conceptualising the study. LS and RG had full access  
4 to the data and take responsibility for the integrity of the data and the accuracy of the data  
5 analysis. RKR and PKS contributed to the interpretation of the data, and critically revised all  
6 versions of the manuscript. LS, RG, RKR and PKS approved the final version of the manuscript.  
7

8  
9 **Competing interests:** None declared.  
10

11 **Patient and Public Involvement:** This study is a part of the large-scale multi country survey  
12 conducted by World Health Organization (WHO). The data is available in public domain for the  
13 use of researchers upon request (<http://www.who.int/healthinfo/sage/en/>). The WHO-SAGE  
14 survey participants in all selected countries were informed about the survey, design, purpose, and  
15 how it would benefit to the society at large. The survey was conducted under the supervision of  
16 respective national governments. The study protocol does not include disseminating the results to  
17 individuals study participants.  
18

19 **Funding:** This research received no specific grant from any funding agency in the public,  
20 commercial or not-for-profit sectors.  
21

22 **Data sharing statement:** The data sets used and/or analysed during this study are available from  
23 the corresponding author on reasonable request.  
24

25  
26 **Acknowledgments:** During the preparation of this paper, Prashant Kumar Singh was a Max  
27 Planck-India Mobility Fellow with the Max Planck Research Group on Gender Gaps in Health  
28 and Survival (MPRG-GGHS), Max Planck Institute for Demographic Research (MPIDR),  
29 Rostock, Germany. We thank the three reviewers for their constructive suggestions at different  
30 stages of publication. WHO-SAGE is supported by the respective governments in collaborating  
31 countries, WHO, and the U.S. National Institute on Aging through Interagency Agreements  
32 ([OGHA 04034785](#); [YA1323-08-CN-0020](#); [Y1-AG-1005-01](#)) and through a research grant ([R01-AG034479](#)).  
33  
34  
35  
36  
37  
38  
39  
40  
41  
42  
43  
44  
45  
46  
47  
48  
49  
50  
51  
52  
53  
54  
55  
56  
57  
58  
59  
60



## References

- 1 Wray LA, Blaum CS. Explaining the role of sex on disability: a population-based study. *Gerontologist* 2001;**41**:499–510.
- 2 Barford A, Dorling D, Smith GD, *et al*. Life expectancy: women now on top everywhere: during 2006, even in the poorest countries, women can expect to outlive men. *BMJ Br Med J* 2006;**332**:808.
- 3 Oksuzyan A, Juel K, Vaupel JW, *et al*. Men: good health and high mortality. Sex differences in health and aging. *Aging Clin Exp Res* 2008;**20**:91.
- 4 Crimmins EM, Kim JK, Solé-Auró A. Gender differences in health: results from SHARE, ELSA and HRS. *Eur J Public Health* 2010;**21**:81–91.
- 5 Yount KM, Agree EM. Differences in disability among older women and men in Egypt and Tunisia. *Demography* 2005;**42**:169–87.
- 6 Ng N, Kowal P, Kahn K, *et al*. Health inequalities among older men and women in Africa and Asia: evidence from eight Health and Demographic Surveillance System sites in the INDEPTH WHO-SAGE study. *Glob Health Action* 2010;**3**:5420.
- 7 Deighton CM, Surtees D, Walker DJ. Influence of the severity of rheumatoid arthritis on sex differences in health assessment questionnaire scores. *Ann Rheum Dis* 1992;**51**:473–5.
- 8 Kandrack M-A, Grant KR, Segall A. Gender differences in health related behaviour: some unanswered questions. *Soc Sci Med* 1991;**32**:579–90.
- 9 Goli S, Singh L, Jain K, *et al*. Socioeconomic determinants of health inequalities among the older population in India: a decomposition analysis. *J Cross Cult Gerontol* 2014;**29**:353–69.
- 10 Rajan SI. Social assistance for poor elderly: How effective? *Econ Polit Wkly* 2001;:613–7.
- 11 Legato MJ, Johnson PA, Manson JE. Consideration of sex differences in medicine to improve health care and patient outcomes. *Jama* 2016;**316**:1865–6.

- 1  
2  
3 12 MOHFW. National Health Policy 2017. 2017.  
4 <https://mohfw.gov.in/sites/default/files/9147562941489753121.pdf>  
5  
6  
7 13 Patel V, Chatterji S, Chisholm D, *et al.* Chronic diseases and injuries in India. *Lancet*  
8 2011;**377**:413–28.  
9  
10  
11 14 Kowal P, Chatterji S, Naidoo N, *et al.* Data resource profile: the World Health  
12 Organization Study on global AGEing and adult health (SAGE). *Int J Epidemiol*  
13 2012;**41**:1639–49.  
14  
15  
16  
17 15 Arokiasamy P, Parasuraman S, Sekher T V, *et al.* Study on global AGEing and adult  
18 health (SAGE) Wave 1, India National Report. *Int Inst Popul Sci Geneva World Heal*  
19 *Organ* 2013.  
20  
21  
22  
23  
24 16 Pérès K, Helmer C, Letenneur L, *et al.* Ten-year change in disability prevalence and  
25 related factors in two generations of French elderly community dwellers: data from the  
26 PAQUID study. *Aging Clin Exp Res* 2005;**17**:229–35.  
27  
28  
29  
30 17 Barberger-Gateau P, Rainville C, Letenneur L, *et al.* A hierarchical model of domains of  
31 disablement in the elderly: a longitudinal approach. *Disabil Rehabil* 2000;**22**:308–17.  
32  
33  
34 18 Fujiwara Y, Shinkai S, Kumagai S, *et al.* Longitudinal changes in higher-level functional  
35 capacity of an older population living in a Japanese urban community. *Arch Gerontol*  
36 *Geriatr* 2003;**36**:141–53.  
37  
38  
39  
40 19 Díaz-Venegas C, Reistetter TA, Wang C-Y, *et al.* The progression of disability among  
41 older adults in Mexico. *Disabil Rehabil* 2016;**38**:2016–27.  
42  
43  
44  
45 20 Sengupta M, Agree EM. Gender and disability among older adults in North and South  
46 India: differences associated with coresidence and marriage. *J Cross Cult Gerontol*  
47 2002;**17**:313–36.  
48  
49  
50  
51 21 Chen M, Drèze J. Widows and health in rural north India. *Econ Polit Wkly* 1992;:WS81-  
52 WS92.  
53  
54  
55 22 Krochalk PC, Li Y, Chi I. Widowhood and self-rated health among Chinese elders: The

- effect of economic condition. *Australas J Ageing* 2008;**27**:26–32.
- 23 Manzoli L, Villari P, Pirone GM, *et al.* Marital status and mortality in the elderly: a systematic review and meta-analysis. *Soc Sci Med* 2007;**64**:77–94.
- 24 Dreze J, Srinivasan P V. Widowhood and poverty in rural India: Some inferences from household survey data. *J Dev Econ* 1997;**54**:217–34.
- 25 Herd P, Goesling B, House JS. Socioeconomic position and health: the differential effects of education versus income on the onset versus progression of health problems. *J Health Soc Behav* 2007;**48**:223–38.
- 26 Elo IT. Social class differentials in health and mortality: Patterns and explanations in comparative perspective. *Annu Rev Sociol* 2009;**35**:553–72.
- 27 Roy K, Chaudhuri A. Influence of socioeconomic status, wealth and financial empowerment on gender differences in health and healthcare utilization in later life: evidence from India. *Soc Sci Med* 2008;**66**:1951–62.
- 28 Das Gupta M, Zhenghua J, Bohua L, *et al.* Why is son preference so persistent in East and South Asia? A cross-country study of China, India and the Republic of Korea. *J Dev Stud* 2003;**40**:153–87.
- 29 Mini GK, Thankappan KR. Pattern, correlates and implications of non-communicable disease multimorbidity among older adults in selected Indian states: a cross-sectional study. *BMJ Open* 2017;**7**:e013529.
- 30 Cramm JM, Lee J. Smoking, physical activity and healthy aging in India. *BMC Public Health* 2014;**14**:526.
- 31 Bhan N, Srivastava S, Agrawal S, *et al.* Are socioeconomic disparities in tobacco consumption increasing in India? A repeated cross-sectional multilevel analysis. *BMJ Open* 2012;**2**:e001348.
- 32 Corsi DJ, Subramanian S V, Lear SA, *et al.* Tobacco use, smoking quit rates, and socioeconomic patterning among men and women: a cross-sectional survey in rural

- 1  
2  
3 Andhra Pradesh, India. *Eur J Prev Cardiol* 2014;**21**:1308–18.  
4  
5  
6 33 Singh L, Singh PK, Arokiasamy P. Social network and mental health among older adults  
7 in rural Uttar Pradesh, India: A cross-sectional study. *J Cross Cult Gerontol* 2016;**31**:173–  
8 92.  
9  
10  
11 34 Ferguson BD, Tandon A, Gakidou E, *et al*. Estimating permanent income using indicator  
12 variables. *Heal Syst Perform Assess debates, methods empiricism Geneva World Heal*  
13 *Organ* 2003;:747–60.  
14  
15  
16  
17 35 Wagstaff A, Paci P, Van Doorslaer E. On the measurement of inequalities in health. *Soc*  
18 *Sci Med* 1991;**33**:545–57.  
19  
20  
21  
22 36 Doorslaer E van, Koolman X. Explaining the differences in income-related health  
23 inequalities across European countries. *Health Econ* 2004;**13**:609–28.  
24  
25  
26  
27 37 Wagstaff A, Van Doorslaer E, Watanabe N. On decomposing the causes of health sector  
28 inequalities with an application to malnutrition inequalities in Vietnam. *J Econom*  
29 2003;**112**:207–23.  
30  
31  
32  
33 38 Vellakkal S, Subramanian S V, Millett C, *et al*. Socioeconomic inequalities in non-  
34 communicable diseases prevalence in India: disparities between self-reported diagnoses  
35 and standardized measures. *PLoS One* 2013;**8**:e68219.  
36  
37  
38  
39 39 Duda RB, Anarfi JK, Adanu RMK, *et al*. The health of the “older women” in Accra,  
40 Ghana: results of the Women’s Health Study of Accra. *J Cross Cult Gerontol*  
41 2011;**26**:299–314.  
42  
43  
44  
45 40 Zhang H, d’Uva TB, Van Doorslaer E. The gender health gap in China: A decomposition  
46 analysis. *Econ Hum Biol* 2015;**18**:13–26.  
47  
48  
49  
50 41 Basu S, King AC. Disability and chronic disease among older adults in India: detecting  
51 vulnerable populations through the WHO SAGE Study. *Am J Epidemiol* 2013;**178**:1620–  
52 8.  
53  
54  
55  
56 42 Dhak B. Gender difference in health and its determinants in the old-aged population in  
57

- 1  
2  
3 India. *J Biosoc Sci* 2009;**41**:625–43.  
4  
5  
6 43 Zeki Al Hazzouri A, Mehio Sibai A, Chaaya M, *et al.* Gender differences in physical  
7 disability among older adults in underprivileged communities in Lebanon. *J Aging Health*  
8 2011;**23**:367–82.  
9  
10  
11 44 Singh L, Arokiasamy P, Singh PK, *et al.* Determinants of gender differences in self-rated  
12 health among older population: evidence from India. *Sage Open*  
13 2013;**3**:2158244013487914.  
14  
15  
16  
17 45 Ghosh S, Husain Z. Economic independence, family support and perceived health status  
18 of elderly: Recent evidence from India. *Asia-Pacific Popul J* 2010;**25**:47–77.  
19  
20  
21  
22 46 Agarwal A, Lubet A, Mitgang E, *et al.* Population Aging in India: Facts, Issues, and  
23 Options. 2016.  
24  
25  
26  
27 47 Zhou B, Chen K, Wang J, *et al.* Quality of life and related factors in the older rural and  
28 urban Chinese populations in Zhejiang province. *J Appl Gerontol* 2011;**30**:199–225.  
29  
30  
31 48 Brinda EM, Attermann J, Gerdtham UG, *et al.* Socio-economic inequalities in health and  
32 health service use among older adults in India: results from the WHO Study on Global  
33 AGEing and adult health survey. *Public Health* 2016;**141**:32–41.  
34  
35  
36  
37 49 Iyer A, Sen G, Östlin P. The intersections of gender and class in health status and health  
38 care. *Glob Public Health* 2008;**3**:13–24.  
39  
40  
41  
42 50 Caldwell JC. Routes to low mortality in poor countries. *Popul Dev Rev* 1986;:171–220.  
43  
44  
45 51 Gupta M Das. Life course perspectives on women's autonomy and health outcomes. *Am*  
46 *Anthropol* 1995;**97**:481–91.  
47  
48  
49 52 Santow G. Social roles and physical health: the case of female disadvantage in poor  
50 countries. *Soc Sci Med* 1995;**40**:147–61.  
51  
52  
53 53 Schuler SR, Bates LM, Islam MDK. Paying for reproductive health services in  
54 Bangladesh: intersections between cost, quality and culture. *Health Policy Plan*  
55  
56  
57  
58  
59  
60

1  
2  
3 2002;**17**:273–80.  
4

5 54 Sen G, Östlin P. Gender inequity in health: why it exists and how we can change it. 2008.  
6

7  
8 55 Ravindran STK, Pinho H de. The right reforms? Health sector reforms and sexual and  
9 reproductive health. In: *The right reforms? Health sector reforms and sexual and*  
10 *reproductive health*. 2005.  
11  
12

13  
14 56 Falkingham J. Poverty, out-of-pocket payments and access to health care: evidence from  
15 Tajikistan. *Soc Sci Med* 2004;**58**:247–58.  
16  
17

18 57 Balarajan Y, Selvaraj S, Subramanian S V. Health care and equity in India. *Lancet*  
19 2011;**377**:505–15.  
20  
21  
22  
23  
24  
25  
26  
27  
28  
29  
30  
31  
32  
33  
34  
35  
36  
37  
38  
39  
40  
41  
42  
43  
44  
45  
46  
47  
48  
49  
50  
51  
52  
53  
54  
55  
56  
57  
58  
59  
60

**Table 1.** Sample Distribution for Population aged 60 and above, WHO-SAGE, India

| <b>Background Characteristics</b>      | <b>Males</b> |      | <b>Females</b> |      | <b>Total</b> |      |
|----------------------------------------|--------------|------|----------------|------|--------------|------|
|                                        | <i>n</i>     | %    | <i>n</i>       | %    | <i>n</i>     | %    |
| <b>Age of the Respondent</b>           |              |      |                |      |              |      |
| 60-64                                  | 615          | 30.0 | 613            | 33.8 | 1,228        | 31.9 |
| 65-69                                  | 589          | 29.3 | 500            | 25.8 | 1,089        | 27.5 |
| 70-74                                  | 395          | 21.2 | 335            | 20.1 | 730          | 20.6 |
| 75-79                                  | 206          | 11.8 | 153            | 9.0  | 359          | 10.4 |
| 80+                                    | 174          | 7.6  | 173            | 11.1 | 347          | 9.4  |
| <b>Marital Status</b>                  |              |      |                |      |              |      |
| Unmarried                              | 32           | 1.5  | 9              | 1.2  | 36           | 1.4  |
| Married                                | 1660         | 87.8 | 812            | 44.7 | 2,477        | 66.1 |
| Widowed                                | 287          | 10.5 | 953            | 54.0 | 1,240        | 32.5 |
| <b>Education of the Respondent</b>     |              |      |                |      |              |      |
| No formal education                    | 745          | 36.3 | 1320           | 75.6 | 2,149        | 56.2 |
| Less than primary                      | 317          | 12.9 | 159            | 9.6  | 446          | 11.2 |
| Completed primary                      | 341          | 19.5 | 161            | 8.9  | 494          | 14.2 |
| Completed secondary                    | 234          | 13.0 | 59             | 2.4  | 275          | 7.6  |
| Completed HS                           | 203          | 11.8 | 52             | 2.2  | 234          | 6.9  |
| Completed college/university/post grad | 139          | 6.3  | 23             | 1.1  | 155          | 3.7  |
| <b>Religion of the Respondent</b>      |              |      |                |      |              |      |
| Hinduism                               | 1603         | 83.7 | 1473           | 86.9 | 3,076        | 85.3 |
| Islam                                  | 245          | 12.6 | 170            | 10.3 | 415          | 11.5 |
| Others                                 | 63           | 3.6  | 60             | 2.7  | 123          | 3.2  |
| <b>Ethnicity of the Respondent</b>     |              |      |                |      |              |      |
| Scheduled Tribe                        | 114          | 5.4  | 73             | 4.5  | 187          | 5.0  |
| Scheduled Caste                        | 329          | 16.8 | 284            | 16.8 | 613          | 16.8 |
| No Caste or Tribe                      | 340          | 12.9 | 325            | 14.8 | 665          | 13.9 |
| Others                                 | 1122         | 64.8 | 1013           | 63.9 | 2,135        | 64.3 |
| <b>Place of Residence</b>              |              |      |                |      |              |      |
| Urban                                  | 472          | 29.6 | 501            | 30.4 | 973          | 30.1 |
| Rural                                  | 1507         | 70.3 | 1273           | 69.5 | 2,780        | 69.9 |
| <b>Wealth Quintile</b>                 |              |      |                |      |              |      |
| Poorest                                | 387          | 22.5 | 363            | 24.8 | 750          | 23.7 |
| Poor                                   | 403          | 22.6 | 344            | 21.9 | 747          | 22.3 |
| Middle                                 | 358          | 17.5 | 346            | 19.4 | 704          | 18.5 |
| Higher                                 | 382          | 17.5 | 309            | 15.9 | 691          | 16.8 |
| Highest                                | 381          | 19.7 | 341            | 17.7 | 722          | 18.8 |
| <b>Tobacco Use</b>                     |              |      |                |      |              |      |
| No                                     | 523          | 24.7 | 1110           | 62.3 | 1,633        | 43.5 |
| Former/Current                         | 1387         | 75.2 | 592            | 37.6 | 1,979        | 56.5 |
| <b>Total</b>                           | <b>1979</b>  |      | <b>1774</b>    |      | <b>3753</b>  |      |

**Table 2:** Gender Stratified Effects and Contribution of Predictor Variables based on Decomposition Analysis for IADL among Older Population aged 60 years and above, WHO-SAGE 2007-08

| Covariates    | Mean         | Beta                | CI            | Contribution to CI | % Contribution | Adjusted % Contribution |
|---------------|--------------|---------------------|---------------|--------------------|----------------|-------------------------|
| <b>Total</b>  |              |                     |               |                    |                |                         |
| Poor          | 0.414        | 0.107 <sup>^</sup>  | -0.580        | -0.034             | 38.648         | 38.517                  |
| Tobacco use   | 0.548        | 0.041               | -0.063        | -0.002             | 2.139          | 2.132                   |
| Illiterate    | 0.680        | 0.165 <sup>#</sup>  | -0.134        | -0.020             | 22.561         | 22.484                  |
| SC/ST         | 0.222        | 0.053               | -0.249        | -0.004             | 4.349          | 4.334                   |
| Muslim        | 0.115        | 0.279 <sup>#</sup>  | -0.127        | -0.005             | 6.089          | 6.069                   |
| Rural         | 0.741        | 0.156 <sup>#</sup>  | -0.109        | -0.017             | 18.912         | 18.848                  |
| Married       | 0.654        | -0.223 <sup>#</sup> | 0.029         | -0.006             | 6.359          | 6.337                   |
| Older (70+)   | 0.383        | 0.474 <sup>#</sup>  | 0.001         | 0.001              | -0.341         |                         |
| Female        | 0.473        | 0.172 <sup>#</sup>  | -0.011        | -0.001             | 1.283          | 1.279                   |
| <b>IADL</b>   | <b>0.760</b> |                     | <b>-0.108</b> | <b>-0.0879</b>     | <b>100.0</b>   | <b>100.0</b>            |
| <b>Male</b>   |              |                     |               |                    |                |                         |
| Poor          | 0.413        | 0.252 <sup>#</sup>  | -0.578        | -0.095             | 62.902         | 61.833                  |
| Tobacco use   | 0.726        | 0.000               | -0.055        | 0.000              | 0.000          |                         |
| Illiterate    | 0.541        | 0.233 <sup>#</sup>  | -0.205        | -0.041             | 26.979         | 26.521                  |
| SC/ST         | 0.233        | -0.030              | -0.241        | 0.003              | -1.729         |                         |
| Muslim        | 0.128        | 0.115               | -0.105        | -0.002             | 1.612          | 1.585                   |
| Rural         | 0.762        | 0.062               | -0.105        | -0.008             | 5.179          | 5.091                   |
| Married       | 0.839        | -0.200 <sup>#</sup> | 0.013         | -0.003             | 2.284          | 2.245                   |
| Older (70+)   | 0.392        | 0.402 <sup>#</sup>  | -0.017        | -0.004             | 2.773          | 2.726                   |
| <b>IADL</b>   | <b>0.635</b> |                     | <b>-0.187</b> | <b>-0.151</b>      | <b>100.0</b>   | <b>100.0</b>            |
| <b>Female</b> |              |                     |               |                    |                |                         |
| Poor          | 0.415        | -0.057              | -0.582        | 0.015              | -45.377        |                         |
| Tobacco use   | 0.348        | 0.070               | -0.094        | -0.003             | 7.595          | 4.742                   |
| Illiterate    | 0.836        | 0.001               | -0.080        | -0.000             | 0.226          | 0.141                   |
| SC/ST         | 0.211        | 0.145 <sup>*</sup>  | -0.259        | -0.009             | 26.317         | 16.429                  |
| Muslim        | 0.100        | 0.509 <sup>#</sup>  | -0.161        | -0.009             | 27.116         | 16.928                  |
| Rural         | 0.717        | 0.290 <sup>#</sup>  | -0.115        | -0.027             | 79.517         | 49.641                  |
| Married       | 0.448        | -0.244 <sup>#</sup> | 0.054         | -0.007             | 19.415         | 12.120                  |
| Older (70+)   | 0.373        | 0.551 <sup>#</sup>  | 0.022         | 0.005              | -14.808        |                         |
| <b>IADL</b>   | <b>0.900</b> |                     | <b>-0.042</b> | <b>-0.034</b>      | <b>100.0</b>   | <b>100.0</b>            |

Note: Significant levels - <0.01 = #; <0.05 = ^; <0.10 = \*



**Table 3:** Gender Stratified Effects and Contribution of Predictor Variables based on Decomposition Analysis for Presence of Chronic Disease of all the Older Population aged 60 years and above, WHO-SAGE 2007-08

| Covariates             | Mean         | Beta                | CI           | Contribution to CI | % Contribution | Adjusted % Contribution |
|------------------------|--------------|---------------------|--------------|--------------------|----------------|-------------------------|
| <b>Total</b>           |              |                     |              |                    |                |                         |
| Poor                   | 0.414        | -0.113 <sup>#</sup> | -0.580       | 0.063              | 42.601         | 42.248                  |
| Tobacco                | 0.548        | 0.015               | -0.063       | -0.001             | -0.836         |                         |
| Illiterate             | 0.680        | -0.143 <sup>#</sup> | -0.134       | 0.030              | 20.472         | 20.302                  |
| SC/ST                  | 0.222        | -0.071 <sup>^</sup> | -0.249       | 0.009              | 6.125          | 6.074                   |
| Muslim                 | 0.115        | -0.029              | -0.127       | 0.001              | 0.651          | 0.645                   |
| Rural                  | 0.741        | -0.242 <sup>#</sup> | -0.109       | 0.045              | 30.734         | 30.479                  |
| Married                | 0.654        | 0.005               | 0.029        | 0.000              | 0.152          | 0.151                   |
| Older(70+)             | 0.383        | 0.091 <sup>#</sup>  | 0.001        | 0.000              | 0.069          | 0.068                   |
| Female                 | 0.473        | -0.004              | -0.011       | 0.000              | 0.033          | 0.033                   |
| <b>Chronic Disease</b> | <b>0.431</b> |                     | <b>0.151</b> | <b>0.148</b>       | <b>100.0</b>   | <b>100.0</b>            |
| <b>Male</b>            |              |                     |              |                    |                |                         |
| Poor                   | 0.413        | -0.119 <sup>#</sup> | -0.578       | 0.063              | 45.750         | 45.035                  |
| Tobacco                | 0.726        | -0.006              | -0.055       | 0.000              | 0.357          | 0.351                   |
| Illiterate             | 0.541        | -0.104 <sup>#</sup> | -0.205       | 0.026              | 18.592         | 18.302                  |
| SC/ST                  | 0.233        | -0.034              | -0.241       | 0.004              | 3.045          | 2.998                   |
| Muslim                 | 0.128        | -0.074              | -0.105       | 0.002              | 1.610          | 1.585                   |
| Rural                  | 0.762        | -0.247 <sup>#</sup> | -0.105       | 0.044              | 31.781         | 31.284                  |
| Married                | 0.839        | 0.026               | 0.013        | 0.001              | 0.454          | 0.447                   |
| Older (70+)            | 0.392        | 0.149 <sup>#</sup>  | -0.017       | -0.002             | -1.589         |                         |
| <b>Chronic Disease</b> | <b>0.452</b> |                     | <b>0.140</b> | <b>0.137</b>       | <b>100.0</b>   | <b>100.0</b>            |
| <b>Female</b>          |              |                     |              |                    |                |                         |
| Poor                   | 0.415        | -0.115 <sup>#</sup> | -0.582       | 0.068              | 42.598         | 41.146                  |
| Tobacco                | 0.348        | 0.036               | -0.094       | -0.003             | -1.799         |                         |
| Illiterate             | 0.145        | -0.226 <sup>#</sup> | -0.080       | 0.037              | 23.323         | 22.529                  |
| SC/ST                  | 0.211        | -0.110 <sup>^</sup> | -0.259       | 0.015              | 9.268          | 8.953                   |
| Muslim                 | 0.100        | 0.034               | -0.161       | -0.001             | -0.844         |                         |
| Rural                  | 0.718        | -0.221 <sup>#</sup> | -0.115       | 0.045              | 28.094         | 27.137                  |
| Married                | 0.448        | -0.024              | 0.054        | -0.001             | -0.884         |                         |
| Older (70+)            | 0.373        | 0.020               | 0.022        | 0.000              | 0.244          | 0.235                   |
| <b>Chronic disease</b> | <b>0.408</b> |                     | <b>0.164</b> | <b>0.159</b>       | <b>100.0</b>   | <b>100.0</b>            |

Note: Significant levels - <0.01 = #; <0.05 = ^; <0.10 = \*

# BMJ Open

## Socioeconomic Inequality in Functional Deficiencies and Chronic Diseases among Older Indian Adults: A Sex-stratified Cross-sectional Decomposition Analysis

|                                 |                                                                                                                                                                                                                                                                                    |
|---------------------------------|------------------------------------------------------------------------------------------------------------------------------------------------------------------------------------------------------------------------------------------------------------------------------------|
| Journal:                        | <i>BMJ Open</i>                                                                                                                                                                                                                                                                    |
| Manuscript ID                   | bmjopen-2018-022787.R2                                                                                                                                                                                                                                                             |
| Article Type:                   | Research                                                                                                                                                                                                                                                                           |
| Date Submitted by the Author:   | 10-Dec-2018                                                                                                                                                                                                                                                                        |
| Complete List of Authors:       | Singh, Lucky; National Institute of Medical Statistics, Goel, Richa; Centre for Catalyzing Change Rai, Rajesh Kumar; Society for Health and Demographic Surveillance, Singh, Prashant Kumar; National Institute of Cancer Prevention and Research, Division of Preventive Oncology |
| <b>Primary Subject Heading</b>: | Public health                                                                                                                                                                                                                                                                      |
| Secondary Subject Heading:      | Global health, Epidemiology                                                                                                                                                                                                                                                        |
| Keywords:                       | functional deficiency, chronic diseases, gender, older adults, India                                                                                                                                                                                                               |
|                                 |                                                                                                                                                                                                                                                                                    |

SCHOLARONE™  
Manuscripts

## Title Page

# Socioeconomic Inequality in Functional Deficiencies and Chronic Diseases among Older Indian Adults: A Sex-stratified Cross-sectional Decomposition Analysis

## Authors

Lucky SINGH <sup>1\*</sup>, Richa GOEL <sup>2</sup>, Rajesh Kumar RAI <sup>3</sup> and Prashant Kumar SINGH<sup>4</sup>

**Keywords:** functional deficiency, chronic diseases, gender, older adults, India

**Word count:** 3737 (excluding title page, abstract, references, figures and tables)

---

*First and corresponding author*

<sup>1</sup>**Lucky Singh**, PhD

*Scientist 'C'*

ICMR – National Institute of Medical Statistics, Indian Council of Medical Research (ICMR),  
Ansari Nagar, New Delhi 110029, India

Email: [lucky.5bhu@gmail.com](mailto:lucky.5bhu@gmail.com)

<sup>2</sup>**Richa Goel**, MA

*Consultant*

Centre for Catalyzing Change  
C-1, HauzKhas, New Delhi 110016

Email: [richa\\_731@yahoo.com](mailto:richa_731@yahoo.com)

<sup>3</sup>**Rajesh Kumar Rai**, MPH

*Senior Research Scientist*

Society for Health and Demographic Surveillance  
Suri, Birbhum 731101, West Bengal, India

Email: [rajesh.iips28@gmail.com](mailto:rajesh.iips28@gmail.com)

<sup>4</sup>**Prashant Kumar Singh**, PhD

*Scientist 'D'*

Division of Preventive Oncology, ICMR – National Institute of Cancer Prevention and Research, Indian  
Council of Medical Research (ICMR), Noida 201301, Uttar Pradesh, India

Email: [prashants.geo@gmail.com](mailto:prashants.geo@gmail.com)

## Abstract

**Objectives:** Older adults with adverse socioeconomic conditions suffer disproportionately from a poor quality of life. Stratified by sex, income-related inequalities have been decomposed for functional deficiencies and chronic diseases among older adults, and the degree to which social and demographic factors contribute to these inequalities were identified in this study.

**Design:** Cross-sectional study.

**Participants:** Data used for this study were retrieved from the World Health Organization (WHO) Study on Global AGEing and Adult Health (SAGE) Wave 1. A total of 3753 individuals (male: 1979; and female: 1774) aged  $\geq 60$  years were found eligible for the analysis.

**Measures:** Instrumental Activity of Daily Living (IADL) deficiency and presence of chronic diseases.

**Method:** The decomposition method proposed by Adam Wagstaff and his colleagues was used. The method allows estimating how determinants of health contribute proportionally to inequality in a health variable.

**Results:** Compared to males, females were disproportionately affected by both functional deficiencies and chronic diseases. The relative contribution of socio-demographic factors to IADL deficiency was highest among those with poor economic status (38.5%), followed by those who were illiterate (22.5%), which collated to 61 percent of the total explained inequalities. Similarly, for chronic diseases, about 93 percent of the relative contribution was shared by those with poor economic status (42.3%), rural residence (30.5%) and illiteracy (20.3%). Significant difference in predictors was evident between men and women in IADL deficiency and chronic illness.

**Conclusion:** Pro-poor intervention strategies could be designed to address functional deficiencies and chronic diseases, with special attention to women.

**Keywords:** functional deficiency, chronic diseases, gender, older adults, India

### Strengths and Limitations of this Study

- This study, the first of its kind, examines the decomposition of socioeconomic inequality in functional deficiency and chronic illness separately for older males and females.
- The findings revealed pro-poor inequality in Instrumental Activity of Daily Living (IADL) deficiency and pro-rich inequality in the occurrence of chronic diseases among both older men and women in India.
- While being poor and illiterate contributed highest to the IADL deficiency among men, rural residence followed by social group and religion contributed most among women.
- Being poor, lives in rural areas and illiterate contributed significantly to the chronic illness among men, whereas among women it was poor economic status, rural residence and illiteracy.
- The cross-sectional study design prevents establishment of any causal inferences from the study results.

## Introduction

Globally, older females experience lower mortality rates and in a few cases, lower prevalence of chronic diseases as compared to their male counterparts [1–4]. Contrary to this, functional limitation and physical disability among women has been higher than that among men, particularly in low and middle income countries [5,6]. Existing evidence shows that the difference in male-female functional limitation could be explained in terms of higher prevalence and severity of arthritis and musculoskeletal disease [4,7] among women along with psychosocial factors – women are more likely to over-report ill health and functional limitations, whereas men would under-report their weaknesses [8]. This pattern may be more evident in low-and-middle income countries where gender norms significantly determine demographic, health and socioeconomic outcomes.

Examining disparities in socioeconomic status and their effect on health outcomes in developing societies is high on the list of priorities in the global agenda. A study has shown that poor economic status contributes to over half of the inequality in self-rated health among older adults in India, followed by illiteracy and rural residence [9]. However, the distribution of socioeconomic resources between men and women is not the same, which gives rise to different explanations for the existing socioeconomic inequalities in health by gender. Of the total older adult population in India, nearly half of them, mostly women are dependants, often due to widowhood, divorce, or separation [10]. Majority of older adult women are deprived of economic security and receive poor healthcare [10]. If results for male and female participants are not studied separately, aggregate results may mask imperative disparities in the mechanism of functional deficiency and chronic diseases [11].

Stratified by sex, income-related inequalities for functional deficiencies and chronic diseases among older adults are decomposed, and the degree to which social and demographic determinants contribute to these inequalities is identified.

This study has the following objectives:

1. To examine the differences in functional deficiency and chronic diseases among older men and women separately

- 2
  - 3
  - 4
  - 5
  - 6
  - 7
  - 8
  - 9
  - 10
  - 11
  - 12
  - 13
  - 14
  - 15
  - 16
  - 17
  - 18
  - 19
  - 20
  - 21
  - 22
  - 23
  - 24
  - 25
  - 26
  - 27
  - 28
  - 29
  - 30
  - 31
  - 32
  - 33
  - 34
  - 35
  - 36
  - 37
  - 38
  - 39
  - 40
  - 41
  - 42
  - 43
  - 44
  - 45
  - 46
  - 47
  - 48
  - 49
  - 50
  - 51
  - 52
  - 53
  - 54
  - 55
  - 56
  - 57
  - 58
  - 59
  - 60
2. To estimate the relative contribution of socioeconomic and demographic factors to the overall functional deficiencies and chronic diseases, separately among men and women.

This study hopes to collate and analyse data to prepare and design programmes to improve the functional capacity and management of chronic diseases among the older adults in India. The National Health Policy (NHP) of India, 2017 acknowledges the healthcare needs of the aging population in India and recommends focused interventions [12] to tackle the rising burden of functional deficiency and chronic diseases [13].

## Methods

### *Study Population*

Data required for this study were retrieved from the World Health Organization (WHO) Study on Global AGEing and Adult Health (SAGE) Wave 1, collected between 2007 and 2010 in India. SAGE is a nationally representative multi-country (China, Ghana, India, Mexico, Russian Federation, and South Africa) study to monitor the health and well-being of adult population aged 50 years and older [14]. In India, respondents were selected from six states – Assam, Karnataka, Maharashtra, Rajasthan, Uttar Pradesh, and West Bengal using a multistage, stratified, random sampling design with every individual having a known non-zero probability of being selected. Overall, the individual response rate was 92 percent. More about the sampling process and SAGE India survey can be obtained from the official report [14,15]. This study followed the United Nation's agreed cut-off age for defining older population (60 years and older). A total 3,753 individuals (male: 1979; and female: 1774) aged 60 years and older were included in this study.

### *Functional Deficiency and Chronic Disease*

Two health outcome events, functional deficiency and presence of chronic diseases, were analyzed. Functional deficiency was measured in terms of Instrumental Activity of Daily Living (IADL). IADL measures the ability to perform relatively complex activities of daily living [16]. Studies have identified a hierarchical structure within the disablement process model from health to disability, and concluded that the first level of disability includes persons with only mobility impairment [17]. The next level in the progression includes those with impairment in mobility

1  
2  
3 plus a limitation in an IADL. Finally, level three includes those with mobility, IADL, and basic  
4 difficulties in daily activities [17,18]. Although, IADL may not assess functional limitation in  
5 basic tasks such as sitting or standing for a long period, bathing, dressing and so on, it provides a  
6 basic understanding of the onset of functional difficulties among older adults [19]. This study  
7 follows the WHO-SAGE definition of IADL. In the WHO-SAGE survey, IADL is composed of  
8 five items that cover higher-level instrumental tasks [15]. The respondents were asked if they  
9 had any difficulty doing the following instrumental tasks during the thirty days preceding the  
10 survey:  
11  
12

- 13 1. ...in taking care of your household responsibilities?
- 14 2. ...in joining community activities (for example, festivities, religious or other activities) in  
15 the same way as anyone else can?
- 16 3. ...in your day to day work
- 17 4. ...in reaching your destination, using private or public transport if needed?
- 18 5. ...in getting out of your home?

19  
20  
21  
22  
23  
24  
25  
26  
27  
28  
29  
30  
31  
32  
33 The responses were categorized into 'none', 'mild', 'moderate', 'severe', and 'extreme'/'cannot  
34 do'. For this study, the responses were grouped into different difficulty levels –

- 35 • No difficulty (when the response was none or mild or moderate=0)
- 36 • Difficulty (when the response was severe or extreme=1).

37  
38  
39  
40  
41  
42  
43 The computed value of the sum of dichotomized five variables ranges from 0 to 5, where the  
44 higher score indicates poor physical functioning.

45  
46  
47 Besides IADL, respondents were asked if they were diagnosed with any of the following chronic  
48 medical conditions (as conveyed by a health care professional): angina, asthma, stroke,  
49 depression, chronic lung disease and hypertension. An affirmative response regarding any of  
50 these medical conditions confirmed the presence of chronic disease.  
51  
52  
53  
54  
55  
56  
57  
58  
59  
60



### *Covariates*

Guided by existing literature, individual and household level binary (1 or 0) covariates that could explain maximum dimensions of inequality were considered. The covariates are sex of the respondent (male or female), current marital status (married or unmarried), social group (Scheduled Caste/Scheduled Tribe or Non-scheduled Caste/Tribe), religion (Muslim or Others), education of the respondent (illiterate or literate), economic status (poor or non-poor), residence (rural or urban) and tobacco use (never, and ever or current). In dichotomous covariates, the assigned value, '1' represents the older population in a disadvantaged socioeconomic group, and the assigned value of '0' indicates the older population in an advantageous position.

The critical role of marital status for a woman in Indian society has been documented in terms of lower access to material resources, and her own social position within and outside the family [20]. Studies from India [21] and elsewhere [22] show that both objective and subjective health measures along with healthcare use are substantially lower among older widowed women than among their married counterparts [23,24].

Earlier literature suggests the protective effect of education on an individual's health, which operates in several ways. For instance, education may positively affect health through postponing the onset of functional limitations and chronic conditions [25], improve health through better management of illnesses, and enhance individual capability to cope with negative emotions [26]. Considering fewer resources, such as power, authority, earnings, household income, and wealth among women, the role of education appears to be vital in explaining women's health in low-and-middle income countries like India [27,28]. Among lifestyle factors physical inactivity, unhealthy diet, consumption of alcohol and use of tobacco have been found to be prominent risk factors for non-communicable diseases [29,30]. In India, smoking is higher among men and they smoke throughout their lives. Women smoke less than men but tend to become smokers at an older age [31,32].

Over 70 percent of the population lives in rural areas in India. Owing to variations in social experience, healthcare, pension policies, state provisions, rural and urban differences in health among older adults are critical. Moreover, with the increase of rural to urban migration among

the young population for better education, employment and living opportunities, the older population left behind in rural areas is at risk [33].

Historically, Scheduled Castes and Scheduled Tribes are identified by the Government of India as socially and economically backward social groups and considered to be in need of protection from social injustice and exploitation, whereas non-Scheduled Caste/Tribes enjoy a higher status in the social hierarchy. Economic groups (poor or non-poor) were derived from the household wealth index provided in the dataset by using the WHO standard approach to estimate income from selected indicator variables [34]. For the decomposition analysis, the top two quintiles (representing 40% of economic status) were grouped as non-poor, and the bottom three quintiles (representing 60% of economic status) were combined as poor.

### *Analytical Approach*

Stratified by sex, a decomposition analysis was conducted to measure the contribution of select covariates to explain the burden of IADL and presence of chronic diseases in several steps. First, the Concentration Index (CI) was estimated to quantify the degree of socioeconomic-related inequality in the health variable [35], IADL and chronic diseases. It can be computed as twice the (weighted) covariance of the health variable and individual's relative rank in the economic gradient, divided by the variable mean according to Equation (1) [36]. The value of the CI ranges between -1 and +1, where negative values explain a variable that is concentrated among disadvantaged people and positive values indicate the opposite. In the absence of inequality, the CI will be zero [35].

$$C = \frac{2}{\mu} \text{cov}_w(y_i, R_i) \quad (1)$$

where  $y_i$  and  $R_i$  are, respectively, the health status of the  $i^{\text{th}}$  individual and the fractional rank of the  $i^{\text{th}}$  individual (for weighted data) in terms of the index of household economic status;  $\mu$  is the (weighted) mean of the health of the sample and  $\text{cov}_w$  denotes the weighted covariance.

The method proposed by Wagstaff and colleagues (2003) [37] was used to decompose socioeconomic inequality in poor health into its determinants. This analysis allows estimating how determinants contribute proportionally to inequality in a health variable. They have showed

that for any linear regression model, link the health variable of interest,  $y$ , to a set of  $k$  health determinants,  $x_k$ :

$$y_i = \alpha + \sum_{k=1} \beta_k x_{ki} + \varepsilon_i \quad (2)$$

Where  $\varepsilon$  is an error term. Given the relationship between  $y_i$  and  $x_{ki}$  in Equation (2), the CI for  $y$  (C) can be written as:

$$C = \sum_{k=1} \left( \frac{\beta_k \bar{x}_k}{\mu} \right) C_k + \frac{GC_\varepsilon}{\mu} = C_y + \frac{GC_\varepsilon}{\mu}, \quad (3)$$

Where  $\mu$  is the mean of  $y$ ,  $\bar{x}_k$  is the mean of  $x_k$ ,  $C_k$  is the CI for  $x_k$  (defined analogously to C). In the last term (which can be computed as a residual),  $GC_\varepsilon$  is the generalized concentration index for  $\varepsilon_i$ .

Equation (3) shows that C can be thought of as being made up of two components. The first is the deterministic, or ‘explained’, component. This is equal to a weighted sum of the concentration indices of the regressors, where the weights are simply the elasticities associated with a percentage change in the explanatory variable ( $\frac{\beta_k \bar{x}_k}{\mu}$ ) of  $y$  with respect to each  $x_k$ . (Elasticity is a unit-free measure of (partial) association that is the percentage change in the dependent variable IADL or presence of chronic illness). The second is a residual, or ‘unexplained’, component. This reflects the inequality in health that cannot be explained by systematic variation in the  $x_k$  across socioeconomic groups. To do a decomposition analysis, the following steps are required:

- i. Regress the health variable against its determinants through an appropriate model. This results in finding the coefficients of the explanatory variables ( $\beta_k$ ).
- ii. Calculate the means of the health variable and each of its determinants ( $\mu$  and  $\bar{x}_k$ ).
- iii. Calculate the concentration indices for the health variable and for the determinants (C and  $C_k$ ) using Equation (1)—as well as the generalized CI of the error term ( $GC_\varepsilon$ ). The CI of each determinant can be calculated using the Equation (1) where  $y_i$  and  $\mu$  are now the

value of that determinant for the  $i^{\text{th}}$  individual and the determinant mean, respectively. At this stage, the values of all the variables included in Equation (3) are known.

iv. Finally, the pure contribution of each determinant included in the model to the inequality in the health variable can be quantified through the following steps:

(a) Calculate the absolute contribution of each determinant by multiplying the health variable elasticity with respect to that determinant and its CI  $\left(\frac{\beta_k \bar{x}_k}{\mu}\right) C_k$

(b) Calculate the *percentage* contribution of each determinant simply through dividing its absolute contribution by the CI of the health variable  $\frac{\left(\frac{\beta_k \bar{x}_k}{\mu}\right) C_k}{c}$ .

Moreover, since the inequality in predicted ill-health will be described given the observed values of the X variable, attention is focused on the first term in the decomposition equation - the predicted inequality as measured by  $C_{\mathcal{F}}$

$$C_{\mathcal{F}} = \sum_{k=1} \left(\frac{\beta_k \bar{x}_k}{\mu}\right) C_k \quad (4)$$

### ***Ethics Statement***

This study used the World Health Organization (WHO) Study on Global AGEing and Adult Health (SAGE) Wave 1 data available in the public domain for use by researchers (<http://www.who.int/healthinfo/sage/en/>), thus no ethical clearance is required for this study. The WHO-SAGE survey participants in all selected countries were informed about the survey, design, purpose, and how it would benefit society at large. The survey was conducted under the supervision of the respective national governments.

### ***Patient and Public Involvement***

This study did not involve any patient and/or public.

### **Results**

**Table 1** presents the sample distribution of population aged 60 and above covered in the SAGE survey. Nearly, three-fifths of the sample size belonged to the age group 60-69 years among both male and female. Over half of the women (54%) were widowed as compared to just 11 percent among men. Every three out of four women in the sample did not attend any formal level of

1  
2  
3 schooling, whereas the corresponding figure among men was 36 percent. Majority of the older  
4 population resides in rural areas (70%). Nearly 75 percent of the men used tobacco, while among  
5 women, it was 38 percent.  
6  
7

8  
9 The decomposition analysis has been interpreted based on three components: mean, marginal  
10 effects and CIs. Negative CI for IADL (or functional deficiencies) indicates that inequality was  
11 concentrated among the poor, and positive CI for chronic diseases among the rich, which  
12 indicates a higher burden. Positive (negative) contributions of association can be interpreted by  
13 indicating that the total health inequality would be lower (higher) if that association had no  
14 impact on the health outcome (instead of that reflected in marginal effects). The contributions are  
15 a mixture of positives and negatives, which sum up to 100. The positive percentages were  
16 adjusted on a *pro rata* basis to offset the negative percentages, as the positive percentages  
17 exaggerate the importance of the determinants. Each health outcome analysis was trailed by a  
18 gender-based comparison to comprehend if there were any real contrasts among the contributions  
19 of various socio-demographic constituents amongst men and women in their income health  
20 inequality.  
21  
22  
23  
24  
25  
26  
27  
28  
29

30  
31 Results of the relative contribution of sociodemographic factors to functional deficiencies were  
32 highest among those with poor economic status (39 per cent), followed by those who were  
33 illiterate (23 per cent), which collated to 61 percent of total explained inequalities (**Table 2**).  
34 Findings show that nine selected covariates together explained 82 percent of the total  
35 inequalities. Sex stratified analysis highlights major contrasts, where the positive adjusted  
36 percentile contribution by poor economic status for males was 61.8 percent, whereas it was  
37 negative for females and thus, adjusted on the *pro rata* basis for other positive contribution  
38 factors (**Table 3**). The highest percentile contribution in functional deficiencies among females  
39 was rural resident (50 per cent), which was substantially low at 5 percent among males. The  
40 second point of comparison was illiteracy, which was 27 percent for males and only 0.1 percent  
41 for females. Among females, Muslims accounted for 17 percent of the total inequality in  
42 functional deficiency and SC/ST social groups, another 16 percent.  
43  
44  
45  
46  
47  
48  
49  
50  
51

52 In case of chronic health condition (**Table 4**), about 93 percent of the relative contribution of  
53 socio-demographic factors was shared by three factors – poor economic status (42%), rural  
54 residence (31%) and illiteracy (20%). Sex-wise comparison (**Table 5**) suggests that among both  
55  
56  
57

1  
2  
3 male and female, poor economic status (45% and 41%) contributed the highest, followed by rural  
4 place of residence (31% and 27%) and illiteracy (18% and 22%) respectively. However, among  
5  
6 females, the contribution of social groups (SCs/STs) was noticeable (9%).  
7

## 8 9 **Discussion and Conclusion**

10  
11 Although, health disparities by socioeconomic group have been firmly established with years of  
12 research, difference in functional ability and chronic health by sex remains inconclusive among  
13 older adults in low and middle-income countries. We believe that this is the first study on sex  
14 stratified decomposing socioeconomic inequality in functional deficiency and chronic illness  
15 among older adults in India.  
16  
17  
18  
19

20  
21 The findings show pro-poor inequality in IADL (or functional) deficiency and pro-rich inequality  
22 in the presence of chronic illness among older adults sample. Determinants such as poor  
23 economic status, illiteracy and rural residence were major contributors to overall IADL  
24 deficiency, and there is a similar pattern among men. However, in the case of women, rural  
25 residence, belonging to SCs/STs social groups, and being Muslim contributed significantly to  
26 IADL deficiency. The findings further suggest that poor economic status, followed by rural  
27 residence and illiteracy contributed the highest in explaining overall inequality in chronic health.  
28 Available evidence from India and other low and middle income countries highlighted low  
29 economic status [27,38], poor education [39,40] and residential segregation [41–43], as key  
30 predictors of functional ability and presence of chronic health among older adults. But, hardly  
31 any study ever attempted to quantify the contribution of these factors.  
32  
33  
34  
35  
36  
37  
38  
39  
40  
41

42 Place of residence contributed to about 50 percent of the inequality in functional deficiency, and  
43 nearly 30 percent in case of chronic illness among women. This could perhaps be attributed to  
44 excess engagement of women in informal rural activities throughout their life as compared to  
45 urban women. For instance, in rural areas, women contribute significantly as agricultural  
46 labourers and are involved in core household management tasks including livestock rearing,  
47 collection of firewood and fetching water even in later life [44]. Their healthcare needs and  
48 nutritional requirements during childhood and adulthood have largely been neglected, in addition  
49 to lack of economic security, mobility, and poor social interactions within the community [45].  
50 The high contribution of rural areas in both IADL and chronic illness could be due to inadequate  
51  
52  
53  
54  
55  
56  
57  
58  
59  
60

1  
2  
3 healthcare infrastructure, poor accessibility and sub-standard quality of care [46,47]. This  
4 situation put women at a disproportionate disadvantage compared to their urban counterparts  
5 with better civic infrastructure, improved health facilities and regular check-ups. Thus, the  
6 combined effect of heavy physical activities and widespread gender neglect in health and  
7 nutrition put rural women at a higher risk of functional limitations during later life as compared  
8 to their urban counterparts.  
9  
10  
11  
12

13  
14 The combined influence of social group (SCs/STs) and religion (Muslim) contributes to over 30  
15 percent of the inequality in IADL disability among women. There were similar observations by  
16 other Indian studies among older population, where particular social groups were more  
17 disadvantaged in health and healthcare [48]. Complex interactions exist between social groups  
18 (castes) and religion in India where substantial inequality is present by gender, access to  
19 education, economic status, and social groups [49]. The SC/ST and Muslim population,  
20 particularly women, are disadvantaged socioeconomically compared to other social groups.  
21 Historically, they are socially excluded, illiterate and mainly engage in the informal sectors or as  
22 agricultural labourers [49]. Thus, there is the likelihood of reporting physical deficiency among  
23 women belonging to these social and religious groups. However, more research is required to  
24 establish this fact, at least in the case of Muslim women. Although, in recent years many  
25 affirmative initiatives have been launched to ensure better education, occupation and livelihood  
26 opportunities to those belonging to SCs/STs, especially women, it is too early to expect any  
27 major change.  
28  
29  
30  
31  
32  
33  
34  
35  
36  
37  
38  
39

40 Economic status was found to be the major contributor in explaining inequality in both IADL  
41 and chronic illness among older adults. However, sex stratified analysis suggests that household  
42 economic status was a major factor in both IADL and chronic illness among males. But, in the  
43 case of women, household economic status and not IADL deficiency contributed to chronic  
44 illness. Earlier evidence supports these results and states that lack of economic support to older  
45 adults increased the likelihood of underutilization of healthcare services in case of any  
46 morbidity/illness [42]. Studies argue that when it comes to interaction between gender and  
47 wealth, Indian women are at a disadvantage due to the long history of patriarchal kinship and  
48 economic structure at the household level [50–52]. Studies have documented that women in  
49 South Asia have restricted access to, and control over, resources within the household [49], poor  
50  
51  
52  
53  
54  
55  
56  
57  
58  
59  
60

1  
2  
3 access to preventive and curative care as they are economically dependent on their husbands or  
4 on the male heads of household [53] and are most vulnerable when healthcare has to be  
5 purchased out-of-pocket or through private insurance [54–56]. Resource-poor older individuals  
6 had lower use of healthcare despite their illness and this could be affecting women adversely  
7 considering the inadequate social protection plan, coupled with poor performance, specifically  
8 for the economically disadvantaged older people [57]. This was reflected in earlier studies too.  
9  
10  
11  
12  
13

### 14 **Strengths and Limitations**

15  
16 The strengths and limitations of the study need to be highlighted. The methodological strength of  
17 the present study includes application of the concentration index. It is sensitive to changes in the  
18 outcome distribution (IADL and chronic illness) of the population across socioeconomic groups.  
19 The application of decomposition analysis [37] to examine the contribution of socioeconomic  
20 factors to the overall health inequality between the poor and the rich strengthens the findings of  
21 this study. Another major strength of this study is the nationally representative sample of older  
22 population drawn from the SAGE survey. SAGE is one of the prominent sources of data that  
23 provides substantial health and related information pertaining to the older population in India. It  
24 has addressed major data gaps in terms of growing socioeconomic inequalities in health in low  
25 and middle income countries like India [14]. The study has used diagnosed chronic morbidity  
26 rather than reported to reduce any bias in the responses.  
27  
28  
29  
30  
31  
32  
33  
34  
35  
36

37 As far as the limitations are concerned, first, the findings based on regression-based  
38 decomposition models lack any causal interpretations. Second, the study does not include any  
39 variables related to psychosocial factors and the health system, which might explain both  
40 functional limitations and chronic illness among older adults. Third, the cross-sectional study  
41 design prevents establishment of any causal inferences from the study results. Finally, how  
42 health measures could have been affected by the type and composition of an individual's social  
43 network [33], has not been considered in this analysis.  
44  
45  
46  
47  
48  
49  
50  
51  
52  
53  
54  
55  
56  
57  
58  
59  
60



1  
2  
3 **Contributors:** PKS contributed in conceptualising the study. LS and RG had full access to the  
4 data and take responsibility for the integrity of the data and the accuracy of data analysis. RKR  
5 and PKS contributed to the interpretation of the data. PKS and LS critically revised all the  
6 versions of the manuscript. LS, RG, RKR and PKS approved the final version of the manuscript.  
7

8  
9 **Competing interests:** None declared.  
10

11 **Funding:** This research received no specific grant from any funding agency in the public,  
12 commercial or not-for-profit sectors.  
13

14 **Data sharing statement:** The WHO SAGE data can be downloaded from the link:  
15

16 <https://www.who.int/healthinfo/sage/e>.  
17  
18

19 **Acknowledgments:** During the preparation of this paper, Prashant Kumar Singh was a Max  
20 Planck-India Fellow with the Max Planck Research Group on Gender Gaps in Health and  
21 Survival (MPRG-GGHS), Max Planck Institute for Demographic Research (MPIDR), Rostock,  
22 Germany. We thank the three reviewers for their constructive suggestions at the different stages  
23 of publications. WHO-SAGE is supported by the respective governments in collaborating  
24 countries, WHO, and the US National Institute on Aging through Interagency Agreements  
25 (OGHA 04034785; YA1323-08-CN-0020; Y1-AG-1005-01) and through a research grant (R01-  
26 AG034479).  
27  
28  
29  
30  
31  
32  
33  
34  
35  
36  
37  
38  
39  
40  
41  
42  
43  
44  
45  
46  
47  
48  
49  
50  
51  
52  
53  
54  
55  
56  
57  
58  
59  
60

## References

- 1 Wray LA, Blaum CS. Explaining the role of sex on disability: a population-based study. *Gerontologist* 2001;**41**:499–510.
- 2 Barford A, Dorling D, Smith GD, et al. Life expectancy: women now on top everywhere: during 2006, even in the poorest countries, women can expect to outlive men. *BMJ Br Med J* 2006;**332**:808.
- 3 Oksuzyan A, Juel K, Vaupel JW, et al. Men: good health and high mortality. Sex differences in health and aging. *Aging Clin Exp Res* 2008;**20**:91.
- 4 Crimmins EM, Kim JK, Solé-Auró A. Gender differences in health: results from SHARE, ELSA and HRS. *Eur J Public Health* 2010;**21**:81–91.
- 5 Yount KM, Agree EM. Differences in disability among older women and men in Egypt and Tunisia. *Demography* 2005;**42**:169–87.
- 6 Ng N, Kowal P, Kahn K, et al. Health inequalities among older men and women in Africa and Asia: evidence from eight Health and Demographic Surveillance System sites in the INDEPTH WHO-SAGE study. *Glob Health Action* 2010;**3**:5420.
- 7 Deighton CM, Surtees D, Walker DJ. Influence of the severity of rheumatoid arthritis on sex differences in health assessment questionnaire scores. *Ann Rheum Dis* 1992;**51**:473–5.
- 8 Kandrack M-A, Grant KR, Segall A. Gender differences in health related behaviour: some unanswered questions. *Soc Sci Med* 1991;**32**:579–90.
- 9 Goli S, Singh L, Jain K, et al. Socioeconomic determinants of health inequalities among the older population in India: a decomposition analysis. *J Cross Cult Gerontol* 2014;**29**:353–69.
- 10 Rajan SI. Social assistance for poor elderly: How effective? *Econ Polit Wkly* 2001;:613–7.
- 11 Legato MJ, Johnson PA, Manson JE. Consideration of sex differences in medicine to improve health care and patient outcomes. *Jama* 2016;**316**:1865–6.

- 1  
2  
3 12 MOHFW. National Health Policy 2017. 2017.  
4 <https://mohfw.gov.in/sites/default/files/9147562941489753121.pdf>  
5  
6  
7 13 Patel V, Chatterji S, Chisholm D, et al. Chronic diseases and injuries in India. *The Lancet*  
8 2011;**377**:413–28.  
9  
10  
11 14 Kowal P, Chatterji S, Naidoo N, et al. Data resource profile: the World Health  
12 Organization Study on global AGEing and adult health (SAGE). *Int J Epidemiol*  
13 2012;**41**:1639–49.  
14  
15  
16  
17 15 Arokiasamy P, Parasuraman S, Sekher T V, et al. Study on global AGEing and adult  
18 health (SAGE) Wave 1, India National Report. *Int Inst Popul Sci Geneva World Heal*  
19 *Organ* 2013.  
20  
21  
22  
23  
24 16 Pérès K, Helmer C, Letenneur L, et al. Ten-year change in disability prevalence and  
25 related factors in two generations of French elderly community dwellers: data from the  
26 PAQUID study. *Aging Clin Exp Res* 2005;**17**:229–35.  
27  
28  
29  
30 17 Barberger-Gateau P, Rainville C, Letenneur L, et al. A hierarchical model of domains of  
31 disablement in the elderly: a longitudinal approach. *Disabil Rehabil* 2000;**22**:308–17.  
32  
33  
34 18 Fujiwara Y, Shinkai S, Kumagai S, et al. Longitudinal changes in higher-level functional  
35 capacity of an older population living in a Japanese urban community. *Arch Gerontol*  
36 *Geriatr* 2003;**36**:141–53.  
37  
38  
39  
40 19 Díaz-Venegas C, Reistetter TA, Wang C-Y, et al. The progression of disability among  
41 older adults in Mexico. *Disabil Rehabil* 2016;**38**:2016–27.  
42  
43  
44  
45 20 Sengupta M, Agree EM. Gender and disability among older adults in North and South  
46 India: differences associated with coresidence and marriage. *J Cross Cult Gerontol*  
47 2002;**17**:313–36.  
48  
49  
50  
51 21 Chen M, Drèze J. Widows and health in rural north India. *Econ Polit Wkly* 1992;WS81-  
52 WS92.  
53  
54  
55  
56 22 Krochalk PC, Li Y, Chi I. Widowhood and self-rated health among Chinese elders: The  
57

- effect of economic condition. *Australas J Ageing* 2008;**27**:26–32.
- 23 Manzoli L, Villari P, Pirone GM, et al. Marital status and mortality in the elderly: a systematic review and meta-analysis. *Soc Sci Med* 2007;**64**:77–94.
- 24 Dreze J, Srinivasan P V. Widowhood and poverty in rural India: Some inferences from household survey data. *J Dev Econ* 1997;**54**:217–34.
- 25 Herd P, Goesling B, House JS. Socioeconomic position and health: the differential effects of education versus income on the onset versus progression of health problems. *J Health Soc Behav* 2007;**48**:223–38.
- 26 Elo IT. Social class differentials in health and mortality: Patterns and explanations in comparative perspective. *Annu Rev Sociol* 2009;**35**:553–72.
- 27 Roy K, Chaudhuri A. Influence of socioeconomic status, wealth and financial empowerment on gender differences in health and healthcare utilization in later life: evidence from India. *Soc Sci Med* 2008;**66**:1951–62.
- 28 Das Gupta M, Zhenghua J, Bohua L, et al. Why is son preference so persistent in East and South Asia? A cross-country study of China, India and the Republic of Korea. *J Dev Stud* 2003;**40**:153–87.
- 29 Mini GK, Thankappan KR. Pattern, correlates and implications of non-communicable disease multimorbidity among older adults in selected Indian states: a cross-sectional study. *BMJ Open* 2017;**7**:e013529.
- 30 Cramm JM, Lee J. Smoking, physical activity and healthy aging in India. *BMC Public Health* 2014;**14**:526.
- 31 Bhan N, Srivastava S, Agrawal S, et al. Are socioeconomic disparities in tobacco consumption increasing in India? A repeated cross-sectional multilevel analysis. *BMJ Open* 2012;**2**:e001348.
- 32 Corsi DJ, Subramanian S V, Lear SA, et al. Tobacco use, smoking quit rates, and socioeconomic patterning among men and women: a cross-sectional survey in rural

- 1  
2  
3 Andhra Pradesh, India. *Eur J Prev Cardiol* 2014;**21**:1308–18.
- 4  
5  
6 33 Singh L, Singh PK, Arokiasamy P. Social network and mental health among older adults  
7 in rural Uttar Pradesh, India: A cross-sectional study. *J Cross Cult Gerontol* 2016;**31**:173–  
8 92.  
9  
10  
11 34 Ferguson BD, Tandon A, Gakidou E, et al. Estimating permanent income using indicator  
12 variables. *Heal Syst Perform Assess debates, methods empiricism Geneva World Health*  
13 *Organ* 2003;747–60.  
14  
15  
16  
17 35 Wagstaff A, Paci P, Van Doorslaer E. On the measurement of inequalities in health. *Soc*  
18 *Sci Med* 1991;**33**:545–57.  
19  
20  
21  
22 36 Doorslaer E van, Koolman X. Explaining the differences in income-related health  
23 inequalities across European countries. *Health Econ* 2004;**13**:609–28.  
24  
25  
26  
27 37 Wagstaff A, Van Doorslaer E, Watanabe N. On decomposing the causes of health sector  
28 inequalities with an application to malnutrition inequalities in Vietnam. *J Econom*  
29 2003;**112**:207–23.  
30  
31  
32  
33 38 Vellakkal S, Subramanian S V, Millett C, et al. Socioeconomic inequalities in non-  
34 communicable diseases prevalence in India: disparities between self-reported diagnoses  
35 and standardized measures. *PLoS One* 2013;**8**:e68219.  
36  
37  
38  
39 39 Duda RB, Anarfi JK, Adanu RMK, et al. The health of the “older women” in Accra,  
40 Ghana: results of the Women’s Health Study of Accra. *J Cross Cult Gerontol*  
41 2011;**26**:299–314.  
42  
43  
44  
45 40 Zhang H, d’Uva TB, Van Doorslaer E. The gender health gap in China: A decomposition  
46 analysis. *Econ Hum Biol* 2015;**18**:13–26.  
47  
48  
49  
50 41 Basu S, King AC. Disability and chronic disease among older adults in India: detecting  
51 vulnerable populations through the WHO SAGE Study. *Am J Epidemiol* 2013;**178**:1620–  
52 53 8.  
54  
55  
56 42 Dhak B. Gender difference in health and its determinants in the old-aged population in

- 1  
2  
3 India. *J Biosoc Sci* 2009;**41**:625–43.  
4  
5  
6 43 Zeki Al Hazzouri A, Mehio Sibai A, Chaaya M, et al. Gender differences in physical  
7 disability among older adults in underprivileged communities in Lebanon. *J Aging Health*  
8 2011;**23**:367–82.  
9  
10  
11 44 Singh L, Arokiasamy P, Singh PK, et al. Determinants of gender differences in self-rated  
12 health among older population: evidence from India. *Sage Open*  
13 2013;**3**:2158244013487914.  
14  
15  
16  
17 45 Ghosh S, Husain Z. Economic independence, family support and perceived health status  
18 of elderly: Recent evidence from India. *Asia-Pacific Popul J* 2010;**25**:47–77.  
19  
20  
21  
22 46 Agarwal A, Lubet A, Mitgang E, et al. Population Aging in India: Facts, Issues, and  
23 Options. 2016.  
24  
25  
26  
27 47 Zhou B, Chen K, Wang J, et al. Quality of life and related factors in the older rural and  
28 urban Chinese populations in Zhejiang province. *J Appl Gerontol* 2011;**30**:199–225.  
29  
30  
31 48 Brinda EM, Attermann J, Gerdtham UG, et al. Socio-economic inequalities in health and  
32 health service use among older adults in India: results from the WHO Study on Global  
33 AGEing and adult health survey. *Public Health* 2016;**141**:32–41.  
34  
35  
36  
37 49 Iyer A, Sen G, Östlin P. The intersections of gender and class in health status and health  
38 care. *Glob Public Health* 2008;**3**:13–24.  
39  
40  
41  
42 50 Caldwell JC. Routes to low mortality in poor countries. *Popul Dev Rev* 1986:171–220.  
43  
44  
45 51 Gupta M Das. Life course perspectives on women's autonomy and health outcomes. *Am*  
46 *Anthropol* 1995;**97**:481–91.  
47  
48  
49 52 Santow G. Social roles and physical health: the case of female disadvantage in poor  
50 countries. *Soc Sci Med* 1995;**40**:147–61.  
51  
52  
53 53 Schuler SR, Bates LM, Islam MDK. Paying for reproductive health services in  
54 Bangladesh: intersections between cost, quality and culture. *Health Policy Plan*  
55  
56  
57  
58  
59  
60

- 1  
2  
3 2002;**17**:273–80.  
4  
5 54 Sen G, Östlin P. Gender inequity in health: why it exists and how we can change it. 2008.  
6  
7  
8 55 Ravindran STK, Pinho H de. The right reforms? Health sector reforms and sexual and  
9 reproductive health. In: *The right reforms? Health sector reforms and sexual and*  
10 *reproductive health*. 2005.  
11  
12  
13  
14 56 Falkingham J. Poverty, out-of-pocket payments and access to health care: Evidence from  
15 Tajikistan. *Soc Sci Med* 2004;**58**:247–58.  
16  
17  
18 57 Balarajan Y, Selvaraj S, Subramanian S V. Health care and equity in India. *The Lancet*  
19 2011;**377**:505–15.  
20  
21  
22  
23  
24  
25  
26  
27  
28  
29  
30  
31  
32  
33  
34  
35  
36  
37  
38  
39  
40  
41  
42  
43  
44  
45  
46  
47  
48  
49  
50  
51  
52  
53  
54  
55  
56  
57  
58  
59  
60

**Table 1.** Sample Distribution for Population aged 60 and above, WHO-SAGE, India

| Background Characteristics             | Males       |      | Females     |      | Total       |      |
|----------------------------------------|-------------|------|-------------|------|-------------|------|
|                                        | <i>n</i>    | %    | <i>n</i>    | %    | <i>n</i>    | %    |
| <b>Age of the Respondent</b>           |             |      |             |      |             |      |
| 60-64                                  | 615         | 30.0 | 613         | 33.8 | 1,228       | 31.9 |
| 65-69                                  | 589         | 29.3 | 500         | 25.8 | 1,089       | 27.5 |
| 70-74                                  | 395         | 21.2 | 335         | 20.1 | 730         | 20.6 |
| 75-79                                  | 206         | 11.8 | 153         | 9.0  | 359         | 10.4 |
| 80+                                    | 174         | 7.6  | 173         | 11.1 | 347         | 9.4  |
| <b>Marital Status</b>                  |             |      |             |      |             |      |
| Unmarried                              | 32          | 1.5  | 9           | 1.2  | 36          | 1.4  |
| Married                                | 1660        | 87.8 | 812         | 44.7 | 2,477       | 66.1 |
| Widowed                                | 287         | 10.5 | 953         | 54.0 | 1,240       | 32.5 |
| <b>Education of the Respondent</b>     |             |      |             |      |             |      |
| No formal education                    | 745         | 36.3 | 1320        | 75.6 | 2,149       | 56.2 |
| Less than primary                      | 317         | 12.9 | 159         | 9.6  | 446         | 11.2 |
| Completed primary                      | 341         | 19.5 | 161         | 8.9  | 494         | 14.2 |
| Completed secondary                    | 234         | 13.0 | 59          | 2.4  | 275         | 7.6  |
| Completed HS                           | 203         | 11.8 | 52          | 2.2  | 234         | 6.9  |
| Completed college/university/post grad | 139         | 6.3  | 23          | 1.1  | 155         | 3.7  |
| <b>Religion of the Respondent</b>      |             |      |             |      |             |      |
| Hinduism                               | 1603        | 83.7 | 1473        | 86.9 | 3,076       | 85.3 |
| Islam                                  | 245         | 12.6 | 170         | 10.3 | 415         | 11.5 |
| Others                                 | 63          | 3.6  | 60          | 2.7  | 123         | 3.2  |
| <b>Ethnicity of the Respondent</b>     |             |      |             |      |             |      |
| Scheduled Tribe                        | 114         | 5.4  | 73          | 4.5  | 187         | 5.0  |
| Scheduled Caste                        | 329         | 16.8 | 284         | 16.8 | 613         | 16.8 |
| No Caste or Tribe                      | 340         | 12.9 | 325         | 14.8 | 665         | 13.9 |
| Others                                 | 1122        | 64.8 | 1013        | 63.9 | 2,135       | 64.3 |
| <b>Place of Residence</b>              |             |      |             |      |             |      |
| Urban                                  | 472         | 29.6 | 501         | 30.4 | 973         | 30.1 |
| Rural                                  | 1507        | 70.3 | 1273        | 69.5 | 2,780       | 69.9 |
| <b>Wealth Quintile</b>                 |             |      |             |      |             |      |
| Poorest                                | 387         | 22.5 | 363         | 24.8 | 750         | 23.7 |
| Poor                                   | 403         | 22.6 | 344         | 21.9 | 747         | 22.3 |
| Middle                                 | 358         | 17.5 | 346         | 19.4 | 704         | 18.5 |
| Higher                                 | 382         | 17.5 | 309         | 15.9 | 691         | 16.8 |
| Highest                                | 381         | 19.7 | 341         | 17.7 | 722         | 18.8 |
| <b>Tobacco Use</b>                     |             |      |             |      |             |      |
| No                                     | 523         | 24.7 | 1110        | 62.3 | 1,633       | 43.5 |
| Former/Current                         | 1387        | 75.2 | 592         | 37.6 | 1,979       | 56.5 |
| <b>Total</b>                           | <b>1979</b> |      | <b>1774</b> |      | <b>3753</b> |      |



**Table 2:** Contribution of Predictor Variables based on Decomposition Analysis for IADL among Older Population aged 60 years and above, WHO-SAGE 2007-08

| Covariates  | Mean        | Beta                | CI           | Contribution to CI | % Contribution | Adjusted % Contribution |
|-------------|-------------|---------------------|--------------|--------------------|----------------|-------------------------|
| Poor        | 0.41        | 0.107 <sup>^</sup>  | -0.58        | -0.03              | 38.65          | 38.52                   |
| Tobacco use | 0.55        | 0.04                | -0.06        | 0.00               | 2.14           | 2.13                    |
| Illiterate  | 0.68        | 0.165 <sup>#</sup>  | -0.13        | -0.02              | 22.56          | 22.48                   |
| SC/ST       | 0.22        | 0.05                | -0.25        | 0.00               | 4.35           | 4.33                    |
| Muslim      | 0.12        | 0.279 <sup>#</sup>  | -0.13        | -0.01              | 6.09           | 6.07                    |
| Rural       | 0.74        | 0.156 <sup>#</sup>  | -0.11        | -0.02              | 18.91          | 18.85                   |
| Married     | 0.65        | -0.223 <sup>#</sup> | 0.03         | -0.01              | 6.36           | 6.34                    |
| Older (70+) | 0.38        | 0.474 <sup>#</sup>  | 0.00         | 0.00               | -0.34          |                         |
| Female      | 0.47        | 0.172 <sup>#</sup>  | -0.01        | 0.00               | 1.28           | 1.28                    |
| <b>IADL</b> | <b>0.76</b> |                     | <b>-0.11</b> | <b>-0.09</b>       | <b>100.0</b>   | <b>100.0</b>            |

Significant levels: <0.01 = #; <0.05 = ^; <0.10 = \*

**Table 3:** Sex Stratified Contribution of Predictor Variables based on Decomposition Analysis for IADL among Older Population aged 60 years and above, WHO-SAGE 2007-08

| Covariates    | Mean        | Beta                | CI           | Contribution to CI | % Contribution | Adjusted % Contribution |
|---------------|-------------|---------------------|--------------|--------------------|----------------|-------------------------|
| <b>Male</b>   |             |                     |              |                    |                |                         |
| Poor          | 0.41        | 0.252 <sup>#</sup>  | -0.58        | -0.10              | 62.90          | 61.83                   |
| Tobacco use   | 0.73        | 0.00                | -0.06        | 0.00               | 0.00           |                         |
| Illiterate    | 0.54        | 0.233 <sup>#</sup>  | -0.21        | -0.04              | 26.98          | 26.52                   |
| SC/ST         | 0.23        | -0.03               | -0.24        | 0.00               | -1.73          |                         |
| Muslim        | 0.13        | 0.12                | -0.11        | 0.00               | 1.61           | 1.59                    |
| Rural         | 0.76        | 0.06                | -0.11        | -0.01              | 5.18           | 5.09                    |
| Married       | 0.84        | -0.200 <sup>#</sup> | 0.01         | 0.00               | 2.28           | 2.25                    |
| Older (70+)   | 0.39        | 0.402 <sup>#</sup>  | -0.02        | 0.00               | 2.77           | 2.73                    |
| <b>IADL</b>   | <b>0.6</b>  |                     | <b>-0.2</b>  | <b>-0.2</b>        | <b>100.0</b>   | <b>100.0</b>            |
| <b>Female</b> |             |                     |              |                    |                |                         |
| Poor          | 0.42        | -0.06               | -0.58        | 0.02               | -45.38         |                         |
| Tobacco use   | 0.35        | 0.07                | -0.09        | 0.00               | 7.60           | 4.74                    |
| Illiterate    | 0.84        | 0.00                | -0.08        | 0.00               | 0.23           | 0.14                    |
| SC/ST         | 0.21        | 0.145 <sup>*</sup>  | -0.26        | -0.01              | 26.32          | 16.43                   |
| Muslim        | 0.10        | 0.509 <sup>#</sup>  | -0.16        | -0.01              | 27.12          | 16.93                   |
| Rural         | 0.72        | 0.290 <sup>#</sup>  | -0.12        | -0.03              | 79.52          | 49.64                   |
| Married       | 0.45        | -0.244 <sup>#</sup> | 0.05         | -0.01              | 19.42          | 12.12                   |
| Older (70+)   | 0.37        | 0.551 <sup>#</sup>  | 0.02         | 0.01               | -14.81         |                         |
| <b>IADL</b>   | <b>0.90</b> |                     | <b>-0.04</b> | <b>-0.03</b>       | <b>100.0</b>   | <b>100.0</b>            |

Significant levels: <0.01 = #; <0.05 = ^; <0.10 = \*

**Table 4:** Contribution of Predictor Variables based on Decomposition Analysis for Chronic Disease of all the Older Population aged 60 years and above, WHO-SAGE 2007-08

| Covariates             | Mean        | Beta                | CI          | Contribution to CI | % Contribution | Adjusted % Contribution |
|------------------------|-------------|---------------------|-------------|--------------------|----------------|-------------------------|
| Poor                   | 0.41        | -0.113 <sup>#</sup> | -0.58       | 0.06               | 42.60          | 42.25                   |
| Tobacco                | 0.55        | 0.02                | -0.06       | 0.00               | -0.84          |                         |
| Illiterate             | 0.68        | -0.143 <sup>#</sup> | -0.13       | 0.03               | 20.47          | 20.30                   |
| SC/ST                  | 0.22        | -0.071 <sup>^</sup> | -0.25       | 0.01               | 6.13           | 6.07                    |
| Muslim                 | 0.12        | -0.03               | -0.13       | 0.00               | 0.65           | 0.65                    |
| Rural                  | 0.74        | -0.242 <sup>#</sup> | -0.11       | 0.05               | 30.73          | 30.48                   |
| Married                | 0.65        | 0.01                | 0.03        | 0.00               | 0.15           | 0.15                    |
| Older (70+)            | 0.38        | 0.091 <sup>#</sup>  | 0.00        | 0.00               | 0.07           | 0.07                    |
| Female                 | 0.47        | 0.00                | -0.01       | 0.00               | 0.03           | 0.03                    |
| <b>Chronic Disease</b> | <b>0.43</b> |                     | <b>0.15</b> | <b>0.15</b>        | <b>100.0</b>   | <b>100.0</b>            |

Significant levels: <0.01 = #; <0.05 = ^; <0.10 = \*

**Table 5:** Sex Stratified Contribution of Predictor Variables based on Decomposition Analysis for Chronic Disease of all the Older Population aged 60 years and above, WHO-SAGE 2007-08

| Covariates             | Mean        | Beta                | CI          | Contribution to CI | % Contribution | Adjusted % Contribution |
|------------------------|-------------|---------------------|-------------|--------------------|----------------|-------------------------|
| <b>Male</b>            |             |                     |             |                    |                |                         |
| Poor                   | 0.41        | -0.119 <sup>#</sup> | -0.58       | 0.06               | 45.75          | 45.04                   |
| Tobacco                | 0.73        | -0.01               | -0.06       | 0.00               | 0.36           | 0.35                    |
| Illiterate             | 0.54        | -0.104 <sup>#</sup> | -0.21       | 0.03               | 18.59          | 18.30                   |
| SC/ST                  | 0.23        | -0.03               | -0.24       | 0.00               | 3.05           | 3.00                    |
| Muslim                 | 0.13        | -0.07               | -0.11       | 0.00               | 1.61           | 1.59                    |
| Rural                  | 0.76        | -0.247 <sup>#</sup> | -0.11       | 0.04               | 31.78          | 31.28                   |
| Married                | 0.84        | 0.03                | 0.01        | 0.00               | 0.45           | 0.45                    |
| Older (70+)            | 0.39        | 0.149 <sup>#</sup>  | -0.02       | 0.00               | -1.59          |                         |
| <b>Chronic Disease</b> | <b>0.45</b> |                     | <b>0.14</b> | <b>0.14</b>        | <b>100.0</b>   | <b>100.0</b>            |
| <b>Female</b>          |             |                     |             |                    |                |                         |
| Poor                   | 0.42        | -0.115 <sup>#</sup> | -0.58       | 0.07               | 42.60          | 41.15                   |
| Tobacco                | 0.35        | 0.04                | -0.09       | 0.00               | -1.80          |                         |
| Illiterate             | 0.15        | -0.226 <sup>#</sup> | -0.08       | 0.04               | 23.32          | 22.53                   |
| SC/ST                  | 0.21        | -0.110 <sup>^</sup> | -0.26       | 0.02               | 9.27           | 8.95                    |
| Muslim                 | 0.10        | 0.03                | -0.16       | 0.00               | -0.84          |                         |
| Rural                  | 0.72        | -0.221 <sup>#</sup> | -0.12       | 0.05               | 28.09          | 27.14                   |
| Married                | 0.45        | -0.02               | 0.05        | 0.00               | -0.88          |                         |
| Older (70+)            | 0.37        | 0.02                | 0.02        | 0.00               | 0.24           | 0.24                    |
| <b>Chronic Disease</b> | <b>0.41</b> |                     | <b>0.16</b> | <b>0.16</b>        | <b>100.0</b>   | <b>100.0</b>            |

Significant levels: <0.01 = #; <0.05 = ^; <0.10 = \*

## STROBE Statement

Checklist of items that should be included in reports of observational studies

| Section/Topic             | Item No | Recommendation                                                                                                                                                                             | Reported on Page No |
|---------------------------|---------|--------------------------------------------------------------------------------------------------------------------------------------------------------------------------------------------|---------------------|
| <b>Title and abstract</b> | 1       | (a) Indicate the study's design with a commonly used term in the title or the abstract                                                                                                     | 1                   |
|                           |         | (b) Provide in the abstract an informative and balanced summary of what was done and what was found                                                                                        | 2                   |
| <b>Introduction</b>       |         |                                                                                                                                                                                            |                     |
| Background/rationale      | 2       | Explain the scientific background and rationale for the investigation being reported                                                                                                       | 4                   |
| Objectives                | 3       | State specific objectives, including any prespecified hypotheses                                                                                                                           | 4,5                 |
| <b>Methods</b>            |         |                                                                                                                                                                                            |                     |
| Study design              | 4       | Present key elements of study design early in the paper                                                                                                                                    | 5                   |
| Setting                   | 5       | Describe the setting, locations, and relevant dates, including periods of recruitment, exposure, follow-up, and data collection                                                            | 5                   |
| Participants              | 6       | (a) <i>Cohort study</i> —Give the eligibility criteria, and the sources and methods of selection of participants. Describe methods of follow-up                                            | 5                   |
|                           |         | <i>Case-control study</i> —Give the eligibility criteria, and the sources and methods of case ascertainment and control selection. Give the rationale for the choice of cases and controls |                     |
|                           |         | <i>Cross-sectional study</i> —Give the eligibility criteria, and the sources and methods of selection of participants                                                                      |                     |
| Variables                 | 7       | (b) <i>Cohort study</i> —For matched studies, give matching criteria and number of exposed and unexposed                                                                                   | 5,6,7               |
|                           |         | <i>Case-control study</i> —For matched studies, give matching criteria and the number of controls per case                                                                                 |                     |
| Data sources/measurement  | 8*      | Clearly define all outcomes, exposures, predictors, potential confounders, and effect modifiers. Give diagnostic criteria, if applicable                                                   | 5,6,7               |
| Bias                      | 9       | For each variable of interest, give sources of data and details of methods of assessment (measurement). Describe comparability of assessment methods if there is more than one group       | 7,8                 |
| Study size                | 10      | Describe any efforts to address potential sources of bias                                                                                                                                  | 10                  |
| Quantitative variables    | 11      | Explain how the study size was arrived at                                                                                                                                                  | 5                   |
| Statistical methods       | 12      | Explain how quantitative variables were handled in the analyses. If applicable, describe which groupings were chosen and why                                                               | 5                   |
|                           |         | (a) Describe all statistical methods, including those used to control for confounding                                                                                                      | 8,9                 |
|                           |         | (b) Describe any methods used to examine subgroups and interactions                                                                                                                        | 9                   |
|                           |         | (c) Explain how missing data were addressed                                                                                                                                                | 9                   |
|                           |         | (d) <i>Cohort study</i> —If applicable, explain how loss to follow-up was addressed                                                                                                        | 9                   |
|                           |         | <i>Case-control study</i> —If applicable, explain how matching of cases and controls was addressed                                                                                         | 9                   |
|                           |         | <i>Cross-sectional study</i> —If applicable, describe analytical methods taking account of sampling strategy                                                                               |                     |
|                           |         | (e) Describe any sensitivity analyses                                                                                                                                                      | 9                   |

| Section/Topic            | Item No | Recommendation                                                                                                                                                                                               | Reported on Page No |
|--------------------------|---------|--------------------------------------------------------------------------------------------------------------------------------------------------------------------------------------------------------------|---------------------|
| <b>Results</b>           |         |                                                                                                                                                                                                              |                     |
| Participants             | 13*     | (a) Report numbers of individuals at each stage of study—eg numbers potentially eligible, examined for eligibility, confirmed eligible, included in the study, completing follow-up, and analysed            | 5                   |
|                          |         | (b) Give reasons for non-participation at each stage                                                                                                                                                         |                     |
|                          |         | (c) Consider use of a flow diagram                                                                                                                                                                           |                     |
| Descriptive data         | 14*     | (a) Give characteristics of study participants (eg demographic, clinical, social) and information on exposures and potential confounders                                                                     | 10,11               |
|                          |         | (b) Indicate number of participants with missing data for each variable of interest                                                                                                                          |                     |
|                          |         | (c) <i>Cohort study</i> —Summarise follow-up time (eg, average and total amount)                                                                                                                             |                     |
| Outcome data             | 15*     | <i>Cohort study</i> —Report numbers of outcome events or summary measures over time                                                                                                                          | 11                  |
|                          |         | <i>Case-control study</i> —Report numbers in each exposure category, or summary measures of exposure                                                                                                         |                     |
|                          |         | <i>Cross-sectional study</i> —Report numbers of outcome events or summary measures                                                                                                                           |                     |
| Main results             | 16      | (a) Give unadjusted estimates and, if applicable, confounder-adjusted estimates and their precision (eg, 95% confidence interval). Make clear which confounders were adjusted for and why they were included | 10,11               |
|                          |         | (b) Report category boundaries when continuous variables were categorized                                                                                                                                    |                     |
|                          |         | (c) If relevant, consider translating estimates of relative risk into absolute risk for a meaningful time period                                                                                             |                     |
| Other analyses           | 17      | Report other analyses done—eg analyses of subgroups and interactions, and sensitivity analyses                                                                                                               | 10                  |
| <b>Discussion</b>        |         |                                                                                                                                                                                                              |                     |
| Key results              | 18      | Summarise key results with reference to study objectives                                                                                                                                                     | 12                  |
| Limitations              | 19      | Discuss limitations of the study, taking into account sources of potential bias or imprecision. Discuss both direction and magnitude of any potential bias                                                   | 14                  |
| Interpretation           | 20      | Give a cautious overall interpretation of results considering objectives, limitations, multiplicity of analyses, results from similar studies, and other relevant evidence                                   | 13                  |
| Generalisability         | 21      | Discuss the generalisability (external validity) of the study results                                                                                                                                        | 13                  |
| <b>Other Information</b> |         |                                                                                                                                                                                                              |                     |
| Funding                  | 22      | Give the source of funding and the role of the funders for the present study and, if applicable, for the original study on which the present article is based                                                | 15                  |

\*Give information separately for cases and controls in case-control studies and, if applicable, for exposed and unexposed groups in cohort and cross-sectional studies.

**Note:** An Explanation and Elaboration article discusses each checklist item and gives methodological background and published examples of transparent reporting. The STROBE checklist is best used in conjunction with this article (freely available on the Web sites of PLoS Medicine at <http://www.plosmedicine.org/>, Annals of Internal Medicine at <http://www.annals.org/>, and Epidemiology at <http://www.epidem.com/>). Information on the STROBE Initiative is available at [www.strobe-statement.org](http://www.strobe-statement.org).

# BMJ Open

## Socioeconomic Inequality in Functional Deficiencies and Chronic Diseases among Older Indian Adults: A Sex-stratified Cross-sectional Decomposition Analysis

|                                 |                                                                                                                                                                                                                                                                                    |
|---------------------------------|------------------------------------------------------------------------------------------------------------------------------------------------------------------------------------------------------------------------------------------------------------------------------------|
| Journal:                        | <i>BMJ Open</i>                                                                                                                                                                                                                                                                    |
| Manuscript ID                   | bmjopen-2018-022787.R3                                                                                                                                                                                                                                                             |
| Article Type:                   | Research                                                                                                                                                                                                                                                                           |
| Date Submitted by the Author:   | 10-Jan-2019                                                                                                                                                                                                                                                                        |
| Complete List of Authors:       | Singh, Lucky; National Institute of Medical Statistics, Goel, Richa; Centre for Catalyzing Change Rai, Rajesh Kumar; Society for Health and Demographic Surveillance, Singh, Prashant Kumar; National Institute of Cancer Prevention and Research, Division of Preventive Oncology |
| <b>Primary Subject Heading</b>: | Public health                                                                                                                                                                                                                                                                      |
| Secondary Subject Heading:      | Global health, Epidemiology                                                                                                                                                                                                                                                        |
| Keywords:                       | functional deficiency, chronic diseases, gender, older adults, India                                                                                                                                                                                                               |
|                                 |                                                                                                                                                                                                                                                                                    |

SCHOLARONE™  
Manuscripts

# Socioeconomic Inequality in Functional Deficiencies and Chronic Diseases among Older Indian Adults: A Sex-stratified Cross-sectional Decomposition Analysis

## Authors

Lucky SINGH <sup>1\*</sup>, Richa GOEL <sup>2</sup>, Rajesh Kumar RAI <sup>3</sup> and Prashant Kumar SINGH<sup>4</sup>

**Keywords:** functional deficiency, chronic diseases, gender, older adults, India

**Word count:** 3737 (excluding title page, abstract, references, figures and tables)

---

\* *First and corresponding author*

<sup>1</sup>**Lucky Singh**, PhD

*Scientist 'C'*

ICMR – National Institute of Medical Statistics, Indian Council of Medical Research (ICMR),  
Ansari Nagar, New Delhi 110029, India

Email: [lucky.5bhu@gmail.com](mailto:lucky.5bhu@gmail.com)

<sup>2</sup>**Richa Goel**, MA

*Consultant*

Centre for Catalyzing Change  
C-1, HauzKhas, New Delhi 110016

Email: [richa\\_731@yahoo.com](mailto:richa_731@yahoo.com)

<sup>3</sup>**Rajesh Kumar Rai**, MPH

*Senior Research Scientist*

Society for Health and Demographic Surveillance  
Suri, Birbhum 731101, West Bengal, India

Email: [rajesh.iips28@gmail.com](mailto:rajesh.iips28@gmail.com)

<sup>4</sup>**Prashant Kumar Singh**, PhD

*Scientist 'D'*

ICMR – National Institute of Cancer Prevention and Research, Indian Council of Medical Research  
(ICMR),

Noida 201301, Uttar Pradesh, India

Email: [prashants.geo@gmail.com](mailto:prashants.geo@gmail.com)



## Abstract

**Objectives:** Older adults with adverse socioeconomic conditions suffer disproportionately from a poor quality of life. Stratified by sex, income-related inequalities have been decomposed for functional deficiencies and chronic diseases among older adults, and the degree to which social and demographic factors contribute to these inequalities were identified in this study.

**Design:** Cross-sectional study.

**Participants:** Data used for this study were retrieved from the World Health Organization (WHO) Study on Global AGEing and Adult Health (SAGE) Wave 1. A total of 3753 individuals (male: 1979; and female: 1774) aged  $\geq 60$  years were found eligible for the analysis.

**Measures:** Instrumental Activity of Daily Living (IADL) deficiency and presence of chronic diseases.

**Method:** The decomposition method proposed by Adam Wagstaff and his colleagues was used. The method allows estimating how determinants of health contribute proportionally to inequality in a health variable.

**Results:** Compared to males, females were disproportionately affected by both functional deficiencies and chronic diseases. The relative contribution of socio-demographic factors to IADL deficiency was highest among those with poor economic status (38.5%), followed by those who were illiterate (22.5%), which collated to 61 percent of the total explained inequalities. Similarly, for chronic diseases, about 93 percent of the relative contribution was shared by those with poor economic status (42.3%), rural residence (30.5%) and illiteracy (20.3%). Significant difference in predictors was evident between men and women in IADL deficiency and chronic illness.

**Conclusion:** Pro-poor intervention strategies could be designed to address functional deficiencies and chronic diseases, with special attention to women.

**Keywords:** functional deficiency, chronic diseases, gender, older adults, India

### Strengths and Limitations of this Study

- This study, the first of its kind, examines the decomposition of socioeconomic inequality in functional deficiency and chronic illness separately for older males and females.
- The findings revealed pro-poor inequality in Instrumental Activity of Daily Living (IADL) deficiency and pro-rich inequality in the occurrence of chronic diseases among both older men and women in India.
- While being poor and illiterate contributed highest to the IADL deficiency among men, rural residence followed by social group and religion contributed most among women.
- Being poor, lives in rural areas and illiterate contributed significantly to the chronic illness among men, whereas among women it was poor economic status, rural residence and illiteracy.
- The cross-sectional study design prevents establishment of any causal inferences from the study results.

## Introduction

Globally, older females experience lower mortality rates and in a few cases, lower prevalence of chronic diseases as compared to their male counterparts [1–4]. Contrary to this, functional limitation and physical disability among women has been higher than that among men, particularly in low and middle income countries [5,6]. Existing evidence shows that the difference in male-female functional limitation could be explained in terms of higher prevalence and severity of arthritis and musculoskeletal disease [4,7] among women along with psychosocial factors – women are more likely to over-report ill health and functional limitations, whereas men would under-report their weaknesses [8]. This pattern may be more evident in low-and-middle income countries where gender norms significantly determine demographic, health and socioeconomic outcomes.

Examining disparities in socioeconomic status and their effect on health outcomes in developing societies is high on the list of priorities in the global agenda. A study has shown that poor economic status contributes to over half of the inequality in self-rated health among older adults in India, followed by illiteracy and rural residence [9]. However, the distribution of socioeconomic resources between men and women is not the same, which gives rise to different explanations for the existing socioeconomic inequalities in health by gender. Of the total older adult population in India, nearly half of them, mostly women are dependants, often due to widowhood, divorce, or separation [10]. Majority of older adult women are deprived of economic security and receive poor healthcare [10]. If results for male and female participants are not studied separately, aggregate results may mask imperative disparities in the mechanism of functional deficiency and chronic diseases [11].

Stratified by sex, income-related inequalities for functional deficiencies and chronic diseases among older adults are decomposed, and the degree to which social and demographic determinants contribute to these inequalities is identified.

This study has the following objectives:

1. To examine the differences in functional deficiency and chronic diseases among older men and women separately

- 2
  - 3
  - 4
  - 5
  - 6
  - 7
  - 8
  - 9
  - 10
  - 11
  - 12
  - 13
  - 14
  - 15
  - 16
  - 17
  - 18
  - 19
  - 20
  - 21
  - 22
  - 23
  - 24
  - 25
  - 26
  - 27
  - 28
  - 29
  - 30
  - 31
  - 32
  - 33
  - 34
  - 35
  - 36
  - 37
  - 38
  - 39
  - 40
  - 41
  - 42
  - 43
  - 44
  - 45
  - 46
  - 47
  - 48
  - 49
  - 50
  - 51
  - 52
  - 53
  - 54
  - 55
  - 56
  - 57
  - 58
  - 59
  - 60
2. To estimate the relative contribution of socioeconomic and demographic factors to the overall functional deficiencies and chronic diseases, separately among men and women.

This study hopes to collate and analyse data to prepare and design programmes to improve the functional capacity and management of chronic diseases among the older adults in India. The National Health Policy (NHP) of India, 2017 acknowledges the healthcare needs of the aging population in India and recommends focused interventions [12] to tackle the rising burden of functional deficiency and chronic diseases [13].

## Methods

### *Study Population*

Data required for this study were retrieved from the World Health Organization (WHO) Study on Global AGEing and Adult Health (SAGE) Wave 1, collected between 2007 and 2010 in India. SAGE is a nationally representative multi-country (China, Ghana, India, Mexico, Russian Federation, and South Africa) study to monitor the health and well-being of adult population aged 50 years and older [14]. In India, respondents were selected from six states – Assam, Karnataka, Maharashtra, Rajasthan, Uttar Pradesh, and West Bengal using a multistage, stratified, random sampling design with every individual having a known non-zero probability of being selected. Overall, the individual response rate was over 92 percent. More about the sampling process and SAGE India survey can be obtained from the official report [14,15]. This study followed the United Nation's agreed cut-off age for defining older population (60 years and older). A total 3,753 individuals (male: 1979; and female: 1774) aged 60 years and older were included in this study.

### *Functional Deficiency and Chronic Disease*

Two health outcome events, functional deficiency and presence of chronic diseases, were analyzed. Functional deficiency was measured in terms of Instrumental Activity of Daily Living (IADL). IADL measures the ability to perform relatively complex activities of daily living [16]. Studies have identified a hierarchical structure within the disablement process model from health to disability, and concluded that the first level of disability includes persons with only mobility impairment [17]. The next level in the progression includes those with impairment in mobility

1  
2  
3 plus a limitation in an IADL. Finally, level three includes those with mobility, IADL, and basic  
4 difficulties in daily activities [17,18]. Although, IADL may not assess functional limitation in  
5 basic tasks such as sitting or standing for a long period, bathing, dressing and so on, it provides a  
6 basic understanding of the onset of functional difficulties among older adults [19]. This study  
7 follows the WHO-SAGE definition of IADL. In the WHO-SAGE survey, IADL is composed of  
8 five items that cover higher-level instrumental tasks [15]. The respondents were asked if they  
9 had any difficulty doing the following instrumental tasks during the thirty days preceding the  
10 survey:  
11  
12

- 13 1. ...in taking care of your household responsibilities?
- 14 2. ...in joining community activities (for example, festivities, religious or other activities) in  
15 the same way as anyone else can?
- 16 3. ...in your day to day work
- 17 4. ...in reaching your destination, using private or public transport if needed?
- 18 5. ...in getting out of your home?

19  
20  
21  
22  
23  
24  
25  
26  
27  
28  
29  
30  
31  
32  
33 The responses were categorized into 'none', 'mild', 'moderate', 'severe', and 'extreme'/'cannot  
34 do'. For this study, the responses were grouped into different difficulty levels –  
35

- 36 • No difficulty (when the response was none or mild or moderate=0)
- 37 • Difficulty (when the response was severe or extreme=1).

38  
39  
40  
41  
42  
43 The computed value of the sum of dichotomized five variables ranges from 0 to 5, where the  
44 higher score indicates poor physical functioning.  
45

46  
47 Besides IADL, respondents were asked if they were diagnosed with any of the following chronic  
48 medical conditions (as conveyed by a health care professional): angina, asthma, stroke,  
49 depression, chronic lung disease and hypertension. An affirmative response regarding any of  
50 these medical conditions confirmed the presence of chronic disease.  
51  
52  
53  
54  
55  
56  
57  
58  
59  
60

### *Covariates*

Guided by existing literature, individual and household level binary (1 or 0) covariates that could explain maximum dimensions of inequality were considered. The covariates are sex of the respondent (male or female), current marital status (married or unmarried), social group (Scheduled Caste/Scheduled Tribe or Non-scheduled Caste/Tribe), religion (Muslim or Others), education of the respondent (illiterate or literate), economic status (poor or non-poor), residence (rural or urban) and tobacco use (never, and ever or current). In dichotomous covariates, the assigned value, '1' represents the older population in a disadvantaged socioeconomic group, and the assigned value of '0' indicates the older population in an advantageous position.

The critical role of marital status for a woman in Indian society has been documented in terms of lower access to material resources, and her own social position within and outside the family [20]. Studies from India [21] and elsewhere [22] show that both objective and subjective health measures along with healthcare use are substantially lower among older widowed women than among their married counterparts [23,24].

Earlier literature suggests the protective effect of education on an individual's health, which operates in several ways. For instance, education may positively affect health through postponing the onset of functional limitations and chronic conditions [25], improve health through better management of illnesses, and enhance individual capability to cope with negative emotions [26]. Considering fewer resources, such as power, authority, earnings, household income, and wealth among women, the role of education appears to be vital in explaining women's health in low-and-middle income countries like India [27,28]. Among lifestyle factors physical inactivity, unhealthy diet, consumption of alcohol and use of tobacco have been found to be prominent risk factors for non-communicable diseases [29,30]. In India, smoking is higher among men and they smoke throughout their lives. Women smoke less than men but tend to become smokers at an older age [31,32].

Over 70 percent of the population lives in rural areas in India. Owing to variations in social experience, healthcare, pension policies, state provisions, rural and urban differences in health among older adults are critical. Moreover, with the increase of rural to urban migration among

the young population for better education, employment and living opportunities, the older population left behind in rural areas is at risk [33].

Historically, Scheduled Castes and Scheduled Tribes are identified by the Government of India as socially and economically backward social groups and considered to be in need of protection from social injustice and exploitation, whereas non-Scheduled Caste/Tribes enjoy a higher status in the social hierarchy. Economic groups (poor or non-poor) were derived from the household wealth index provided in the dataset by using the WHO standard approach to estimate income from selected indicator variables [34]. For the decomposition analysis, the top two quintiles (representing 40% of economic status) were grouped as non-poor, and the bottom three quintiles (representing 60% of economic status) were combined as poor.

### *Analytical Approach*

Stratified by sex, a decomposition analysis was conducted to measure the contribution of select covariates to explain the burden of IADL and presence of chronic diseases in following steps [35]. First, to quantify the extent of socioeconomic inequality in IADL and chronic diseases outcomes we used Concentration Index (CI) [36]. It could be computed as twice the weighted covariance of health outcomes and relative ranking of individuals in economic gradient divided by variable mean as mentioned in Equation (1) [37]. The range of CI varies between -1 and +1, where a negative value refers that the poor health outcomes concentrated among the disadvantage group and positive values refers the opposite. The zero value of CI shows absence of inequality [36].

$$C = \frac{2}{\mu} \text{cov}_w(y_i, R_i) \quad (1)$$

where,  $y_i$  and  $R_i$  are the poor IADL or presence of chronic diseases of the  $i^{\text{th}}$  individual and the fractional rank of  $i^{\text{th}}$  individual of the index of household economic status for weighted data;  $\mu$  is the (weighted) mean of both health outcomes of the sample and  $\text{cov}_w$  denotes the weighted covariance.

Study applied decomposition method developed by Wagstaff and colleagues (2003) [38] to decompose socioeconomic inequality in poor IADL or presence of chronic diseases into its

determinants. The method enables to show how factors contribute proportionally to health inequality. For instance, any linear regression model link the outcome of interest,  $y$ , to a set of  $k$  determinants,  $x_k$  as:

$$y_i = \alpha + \sum_{k=1} \beta_k x_{ki} + \varepsilon_i \quad (2)$$

Where,  $\varepsilon$  is an error term. Given the relationship between  $y_i$  and  $x_{ki}$  in Equation (2), the CI for  $y$  (C) can be written as:

$$C = \sum_{k=1} \left( \frac{\beta_k \bar{x}_k}{\mu} \right) C_k + \frac{GC_\varepsilon}{\mu} = C_y + \frac{GC_\varepsilon}{\mu}, \quad (3)$$

Where  $\mu$  is the mean of  $y$ ,  $\bar{x}_k$  is the mean of  $x_k$ ,  $C_k$  is the CI for  $x_k$  (defined analogously to C), and in the last term,  $GC_\varepsilon$  is the generalized concentration index for  $\varepsilon_i$ .

In equation (3), C can be thought of as being made up of two components – ‘explained’ and ‘unexplained’ components. The ‘explained’ or ‘deterministic’ component is similar to weighted sum of the CIs of the regressors where the weights are simply the elasticities associated with a percentage change in the explanatory variable  $\left( \frac{\beta_k \bar{x}_k}{\mu} \right)$  of  $y$  with respect to each  $x_k$ . On the other hand, ‘unexplained’ or ‘residual’ refers inequality in outcome that cannot be described by systematic variation in the  $x_k$  across different socioeconomic groups.

To do a decomposition analysis, the following steps are required

- i. The outcome variable against its factors needs to be regress to find out the coefficients of the explanatory variables ( $\beta_k$ ).
- ii. Calculate mean of the outcomes and each of its factors ( $\mu$  and  $\bar{x}_k$ ).
- iii. Using the Equation (1) where  $y_i$  and  $\mu$  are determinant for the  $i^{\text{th}}$  individual and the determinant mean, respectively. The values of all variables included in Equation (3) are known.
- iv. At last, the net contribution of each factor can be quantified in two following steps:



- a. Computing net contribution of each factor by multiplying the health outcomes elasticity with respect to that factor and its CI  $\left(\frac{\beta_k \bar{x}_k}{\mu}\right) C_k$
- b. Calculate the *percentage* contribution of each factor through dividing its net contribution by the CI of the health outcome  $\frac{\left(\frac{\beta_k \bar{x}_k}{\mu}\right) C_k}{C}$ .

### ***Ethics Statement***

This study used the World Health Organization (WHO) Study on Global AGEing and Adult Health (SAGE) Wave 1 data available in the public domain for use by researchers (<http://www.who.int/healthinfo/sage/en/>), thus no ethical clearance is required for this study. The WHO-SAGE survey participants in all selected countries were informed about the survey, design, purpose, and how it would benefit society at large. The survey was conducted under the supervision of the respective national governments.

### ***Patient and Public Involvement***

This study did not involve any patient and/or public.

### **Results**

**Table 1** presents the sample distribution of population aged 60 and above covered in the SAGE survey. Nearly, three-fifths of the sample size belonged to the age group 60-69 years among both male and female. Over half of the women (54%) were widowed as compared to just 11 percent among men. Every three out of four women in the sample did not attend any formal level of schooling, whereas the corresponding figure among men was 36 percent. Majority of the older population resides in rural areas (70%). Nearly 75 percent of the men used tobacco, while among women, it was 38 percent.

The decomposition analysis has been interpreted based on three components: mean, marginal effects and CIs. Negative CI for IADL (or functional deficiencies) indicates that inequality was concentrated among the poor, and positive CI for chronic diseases among the rich, which indicates a higher burden. Positive (negative) contributions of association can be interpreted by indicating that the total health inequality would be lower (higher) if that association had no impact on the health outcome (instead of that reflected in marginal effects). The contributions are

1  
2  
3 a mixture of positives and negatives, which sum up to 100. The positive percentages were  
4 adjusted on a *pro rata* basis to offset the negative percentages, as the positive percentages  
5 exaggerate the importance of the determinants. Each health outcome analysis was trailed by a  
6 gender-based comparison to comprehend if there were any real contrasts among the contributions  
7 of various socio-demographic constituents amongst men and women in their income health  
8 inequality.  
9  
10  
11  
12  
13

14 Results of the relative contribution of sociodemographic factors to functional deficiencies were  
15 highest among those with poor economic status (39 per cent), followed by those who were  
16 illiterate (23 per cent), which collated to 61 percent of total explained inequalities (**Table 2**).  
17 Findings show that nine selected covariates together explained 82 percent of the total  
18 inequalities. Sex stratified analysis highlights major contrasts, where the positive adjusted  
19 percentile contribution by poor economic status for males was 61.8 percent, whereas it was  
20 negative for females and thus, adjusted on the *pro rata* basis for other positive contribution  
21 factors (**Table 3**). The highest percentile contribution in functional deficiencies among females  
22 was rural resident (50 per cent), which was substantially low at 5 percent among males. The  
23 second point of comparison was illiteracy, which was 27 percent for males and only 0.1 percent  
24 for females. Among females, Muslims accounted for 17 percent of the total inequality in  
25 functional deficiency and SC/ST social groups, another 16 percent.  
26  
27  
28  
29  
30  
31  
32  
33  
34  
35

36 In case of chronic health condition (**Table 4**), about 93 percent of the relative contribution of  
37 socio-demographic factors was shared by three factors – poor economic status (42%), rural  
38 residence (31%) and illiteracy (20%). Sex-wise comparison (**Table 5**) suggests that among both  
39 male and female, poor economic status (45% and 41%) contributed the highest, followed by rural  
40 place of residence (31% and 27%) and illiteracy (18% and 22%) respectively. However, among  
41 females, the contribution of social groups (SCs/STs) was noticeable (9%).  
42  
43  
44  
45  
46

## 47 **Discussion and Conclusion**

48

49 Although, health disparities by socioeconomic group have been firmly established with years of  
50 research, difference in functional ability and chronic health by sex remains inconclusive among  
51 older adults in low and middle-income countries. We believe that this is the first study on sex  
52 stratified decomposing socioeconomic inequality in functional deficiency and chronic illness  
53 among older adults in India.  
54  
55  
56  
57

1  
2  
3  
4 The findings show pro-poor inequality in IADL (or functional) deficiency and pro-rich inequality  
5 in the presence of chronic illness among older adults sample. Determinants such as poor  
6 economic status, illiteracy and rural residence were major contributors to overall IADL  
7 deficiency, and there is a similar pattern among men. However, in the case of women, rural  
8 residence, belonging to SCs/STs social groups, and being Muslim contributed significantly to  
9 IADL deficiency. The findings further suggest that poor economic status, followed by rural  
10 residence and illiteracy contributed the highest in explaining overall inequality in chronic health.  
11 Available evidence from India and other low and middle income countries highlighted low  
12 economic status [27,39], poor education [40,41] and residential segregation [42–44], as key  
13 predictors of functional ability and presence of chronic health among older adults. But, hardly  
14 any study ever attempted to quantify the contribution of these factors.  
15  
16  
17  
18  
19  
20  
21  
22  
23  
24

25 Place of residence contributed to about 50 percent of the inequality in functional deficiency, and  
26 nearly 30 percent in case of chronic illness among women. This could perhaps be attributed to  
27 excess engagement of women in informal rural activities throughout their life as compared to  
28 urban women. For instance, in rural areas, women contribute significantly as agricultural  
29 labourers and are involved in core household management tasks including livestock rearing,  
30 collection of firewood and fetching water even in later life [45]. Their healthcare needs and  
31 nutritional requirements during childhood and adulthood have largely been neglected, in addition  
32 to lack of economic security, mobility, and poor social interactions within the community [46].  
33 The high contribution of rural areas in both IADL and chronic illness could be due to inadequate  
34 healthcare infrastructure, poor accessibility and sub-standard quality of care [47,48]. This  
35 situation put women at a disproportionate disadvantage compared to their urban counterparts  
36 with better civic infrastructure, improved health facilities and regular check-ups. Thus, the  
37 combined effect of heavy physical activities and widespread gender neglect in health and  
38 nutrition put rural women at a higher risk of functional limitations during later life as compared  
39 to their urban counterparts.  
40  
41  
42  
43  
44  
45  
46  
47  
48  
49  
50  
51

52 The combined influence of social group (SCs/STs) and religion (Muslim) contributes to over 30  
53 percent of the inequality in IADL disability among women. There were similar observations by  
54 other Indian studies among older population, where particular social groups were more  
55  
56  
57

1  
2  
3 disadvantaged in health and healthcare [49]. Complex interactions exist between social groups  
4 (castes) and religion in India where substantial inequality is present by gender, access to  
5 education, economic status, and social groups [50]. The SC/ST and Muslim population,  
6 particularly women, are disadvantaged socioeconomically compared to other social groups.  
7 Historically, they are socially excluded, illiterate and mainly engage in the informal sectors or as  
8 agricultural labourers [50]. Thus, there is the likelihood of reporting physical deficiency among  
9 women belonging to these social and religious groups. However, more research is required to  
10 establish this fact, at least in the case of Muslim women. Although, in recent years many  
11 affirmative initiatives have been launched to ensure better education, occupation and livelihood  
12 opportunities to those belonging to SCs/STs, especially women, it is too early to expect any  
13 major change.  
14  
15  
16  
17  
18  
19  
20  
21  
22

23 Economic status was found to be the major contributor in explaining inequality in both IADL  
24 and chronic illness among older adults. However, sex stratified analysis suggests that household  
25 economic status was a major factor in both IADL and chronic illness among males. But, in the  
26 case of women, household economic status and not IADL deficiency contributed to chronic  
27 illness. Earlier evidence supports these results and states that lack of economic support to older  
28 adults increased the likelihood of underutilization of healthcare services in case of any  
29 morbidity/illness [43]. Studies argue that when it comes to interaction between gender and  
30 wealth, Indian women are at a disadvantage due to the long history of patriarchal kinship and  
31 economic structure at the household level [51–53]. Studies have documented that women in  
32 South Asia have restricted access to, and control over, resources within the household [50], poor  
33 access to preventive and curative care as they are economically dependent on their husbands or  
34 on the male heads of household [54] and are most vulnerable when healthcare has to be  
35 purchased out-of-pocket or through private insurance [55–57]. Resource-poor older individuals  
36 had lower use of healthcare despite their illness and this could be affecting women adversely  
37 considering the inadequate social protection plan, coupled with poor performance, specifically  
38 for the economically disadvantaged older people [58]. This was reflected in earlier studies too.  
39  
40  
41  
42  
43  
44  
45  
46  
47  
48  
49  
50  
51

### 52 **Strengths and Limitations**

53 The strengths and limitations of the study need to be highlighted. The methodological strength of  
54 the present study includes application of the concentration index. It is sensitive to changes in the  
55  
56  
57

1  
2  
3 outcome distribution (IADL and chronic illness) of the population across socioeconomic groups.  
4 The application of decomposition analysis [38] to examine the contribution of socioeconomic  
5 factors to the overall health inequality between the poor and the rich strengthens the findings of  
6 this study. Another major strength of this study is the nationally representative sample of older  
7 population drawn from the SAGE survey. SAGE is one of the prominent sources of data that  
8 provides substantial health and related information pertaining to the older population in India. It  
9 has addressed major data gaps in terms of growing socioeconomic inequalities in health in low  
10 and middle income countries like India [14]. The study has used diagnosed chronic morbidity  
11 rather than reported to reduce any bias in the responses.  
12  
13  
14  
15  
16  
17  
18  
19

20 As far as the limitations are concerned, first, the findings based on regression-based  
21 decomposition models lack any causal interpretations. Second, the study does not include any  
22 variables related to psychosocial factors and the health system, which might explain both  
23 functional limitations and chronic illness among older adults. Third, the cross-sectional study  
24 design prevents establishment of any causal inferences from the study results. Finally, how  
25 health measures could have been affected by the type and composition of an individual's social  
26 network [33], has not been considered in this analysis.  
27  
28  
29  
30  
31  
32  
33  
34  
35  
36  
37  
38  
39  
40

41 **Contributors:** PKS contributed in conceptualising the study. LS and RG had full access to the  
42 data and take responsibility for the integrity of the data and the accuracy of data analysis. RKR  
43 and PKS contributed to the interpretation of the data. PKS and LS critically revised all the  
44 versions of the manuscript. LS, RG, RKR and PKS approved the final version of the manuscript.  
45  
46

47 **Competing interests:** None declared.  
48

49 **Funding:** This research received no specific grant from any funding agency in the public,  
50 commercial or not-for-profit sectors.  
51

52 **Data sharing statement:** The WHO SAGE data can be downloaded from the link:  
53

54 <https://www.who.int/healthinfo/sage/e>.  
55  
56  
57  
58  
59  
60

1  
2  
3 **Acknowledgments:** During the preparation of this paper, Prashant Kumar Singh was a Max  
4 Planck-India Fellow with the Max Planck Research Group on Gender Gaps in Health and  
5 Survival (MPRG-GGHS), Max Planck Institute for Demographic Research (MPIDR), Rostock,  
6 Germany. We thank the three reviewers for their constructive suggestions at the different stages  
7 of publications. WHO-SAGE is supported by the respective governments in collaborating  
8 countries, WHO, and the US National Institute on Aging through Interagency Agreements  
9 (OGHA 04034785; YA1323-08-CN-0020; Y1-AG-1005-01) and through a research grant (R01-  
10 AG034479).  
11  
12  
13  
14  
15  
16  
17  
18  
19  
20  
21  
22  
23  
24  
25  
26  
27  
28  
29  
30  
31  
32  
33  
34  
35  
36  
37  
38  
39  
40  
41  
42  
43  
44  
45  
46  
47  
48  
49  
50  
51  
52  
53  
54  
55  
56  
57  
58  
59  
60

For peer review only

## References

- 1 Wray LA, Blaum CS. Explaining the role of sex on disability: a population-based study. *Gerontologist* 2001;**41**:499–510.
- 2 Barford A, Dorling D, Smith GD, *et al*. Life expectancy: women now on top everywhere: during 2006, even in the poorest countries, women can expect to outlive men. *BMJ Br Med J* 2006;**332**:808.
- 3 Oksuzyan A, Juel K, Vaupel JW, *et al*. Men: good health and high mortality. Sex differences in health and aging. *Aging Clin Exp Res* 2008;**20**:91.
- 4 Crimmins EM, Kim JK, Solé-Auró A. Gender differences in health: results from SHARE, ELSA and HRS. *Eur J Public Health* 2010;**21**:81–91.
- 5 Yount KM, Agree EM. Differences in disability among older women and men in Egypt and Tunisia. *Demography* 2005;**42**:169–87.
- 6 Ng N, Kowal P, Kahn K, *et al*. Health inequalities among older men and women in Africa and Asia: evidence from eight Health and Demographic Surveillance System sites in the INDEPTH WHO-SAGE study. *Glob Health Action* 2010;**3**:5420.
- 7 Deighton CM, Surtees D, Walker DJ. Influence of the severity of rheumatoid arthritis on sex differences in health assessment questionnaire scores. *Ann Rheum Dis* 1992;**51**:473–5.
- 8 Kandrack M-A, Grant KR, Segall A. Gender differences in health related behaviour: some unanswered questions. *Soc Sci Med* 1991;**32**:579–90.
- 9 Goli S, Singh L, Jain K, *et al*. Socioeconomic determinants of health inequalities among the older population in India: a decomposition analysis. *J Cross Cult Gerontol* 2014;**29**:353–69.
- 10 Rajan SI. Social assistance for poor elderly: How effective? *Econ Polit Wkly* 2001;**6**:13–7.
- 11 Legato MJ, Johnson PA, Manson JE. Consideration of sex differences in medicine to improve health care and patient outcomes. *Jama* 2016;**316**:1865–6.

- 1  
2  
3 12 MOHFW. National Health Policy 2017. 2017.  
4 <https://mohfw.gov.in/sites/default/files/9147562941489753121.pdf>  
5  
6  
7 13 Patel V, Chatterji S, Chisholm D, *et al.* Chronic diseases and injuries in India. *Lancet*  
8 2011;**377**:413–28.  
9  
10  
11 14 Kowal P, Chatterji S, Naidoo N, *et al.* Data resource profile: the World Health  
12 Organization Study on global AGEing and adult health (SAGE). *Int J Epidemiol*  
13 2012;**41**:1639–49.  
14  
15  
16  
17 15 Arokiasamy P, Parasuraman S, Sekher T V, *et al.* Study on global AGEing and adult  
18 health (SAGE) Wave 1, India National Report. *Int Inst Popul Sci Geneva World Heal*  
19 *Organ* 2013.  
20  
21  
22  
23  
24 16 Pérès K, Helmer C, Letenneur L, *et al.* Ten-year change in disability prevalence and  
25 related factors in two generations of French elderly community dwellers: data from the  
26 PAQUID study. *Aging Clin Exp Res* 2005;**17**:229–35.  
27  
28  
29  
30 17 Barberger-Gateau P, Rainville C, Letenneur L, *et al.* A hierarchical model of domains of  
31 disablement in the elderly: a longitudinal approach. *Disabil Rehabil* 2000;**22**:308–17.  
32  
33  
34 18 Fujiwara Y, Shinkai S, Kumagai S, *et al.* Longitudinal changes in higher-level functional  
35 capacity of an older population living in a Japanese urban community. *Arch Gerontol*  
36 *Geriatr* 2003;**36**:141–53.  
37  
38  
39  
40 19 Díaz-Venegas C, Reistetter TA, Wang C-Y, *et al.* The progression of disability among  
41 older adults in Mexico. *Disabil Rehabil* 2016;**38**:2016–27.  
42  
43  
44  
45 20 Sengupta M, Agree EM. Gender and disability among older adults in North and South  
46 India: differences associated with coresidence and marriage. *J Cross Cult Gerontol*  
47 2002;**17**:313–36.  
48  
49  
50  
51 21 Chen M, Drèze J. Widows and health in rural north India. *Econ Polit Wkly* 1992;:WS81-  
52 WS92.  
53  
54  
55  
56 22 Krochalk PC, Li Y, Chi I. Widowhood and self-rated health among Chinese elders: The  
57



- effect of economic condition. *Australas J Ageing* 2008;**27**:26–32.
- 23 Manzoli L, Villari P, Pirone GM, *et al.* Marital status and mortality in the elderly: a systematic review and meta-analysis. *Soc Sci Med* 2007;**64**:77–94.
- 24 Dreze J, Srinivasan P V. Widowhood and poverty in rural India: Some inferences from household survey data. *J Dev Econ* 1997;**54**:217–34.
- 25 Herd P, Goesling B, House JS. Socioeconomic position and health: the differential effects of education versus income on the onset versus progression of health problems. *J Health Soc Behav* 2007;**48**:223–38.
- 26 Elo IT. Social class differentials in health and mortality: Patterns and explanations in comparative perspective. *Annu Rev Sociol* 2009;**35**:553–72.
- 27 Roy K, Chaudhuri A. Influence of socioeconomic status, wealth and financial empowerment on gender differences in health and healthcare utilization in later life: evidence from India. *Soc Sci Med* 2008;**66**:1951–62.
- 28 Das Gupta M, Zhenghua J, Bohua L, *et al.* Why is son preference so persistent in East and South Asia? A cross-country study of China, India and the Republic of Korea. *J Dev Stud* 2003;**40**:153–87.
- 29 Mini GK, Thankappan KR. Pattern, correlates and implications of non-communicable disease multimorbidity among older adults in selected Indian states: a cross-sectional study. *BMJ Open* 2017;**7**:e013529.
- 30 Cramm JM, Lee J. Smoking, physical activity and healthy aging in India. *BMC Public Health* 2014;**14**:526.
- 31 Bhan N, Srivastava S, Agrawal S, *et al.* Are socioeconomic disparities in tobacco consumption increasing in India? A repeated cross-sectional multilevel analysis. *BMJ Open* 2012;**2**:e001348.
- 32 Corsi DJ, Subramanian S V, Lear SA, *et al.* Tobacco use, smoking quit rates, and socioeconomic patterning among men and women: a cross-sectional survey in rural

- 1  
2  
3 Andhra Pradesh, India. *Eur J Prev Cardiol* 2014;**21**:1308–18.  
4  
5  
6 33 Singh L, Singh PK, Arokiasamy P. Social network and mental health among older adults  
7 in rural Uttar Pradesh, India: A cross-sectional study. *J Cross Cult Gerontol* 2016;**31**:173–  
8 92.  
9  
10  
11 34 Ferguson BD, Tandon A, Gakidou E, *et al*. Estimating permanent income using indicator  
12 variables. *Heal Syst Perform Assess debates, methods empiricism Geneva World Heal*  
13 *Organ* 2003;:747–60.  
14  
15  
16  
17 35 Hosseinpoor AR, Van Doorslaer E, Speybroeck N, *et al*. Decomposing socioeconomic  
18 inequality in infant mortality in Iran. *Int J Epidemiol* 2006;**35**:1211–9.  
19  
20  
21  
22 36 Wagstaff A, Paci P, Van Doorslaer E. On the measurement of inequalities in health. *Soc*  
23 *Sci Med* 1991;**33**:545–57.  
24  
25  
26  
27 37 Doorslaer E van, Koolman X. Explaining the differences in income-related health  
28 inequalities across European countries. *Health Econ* 2004;**13**:609–28.  
29  
30  
31  
32 38 Wagstaff A, Van Doorslaer E, Watanabe N. On decomposing the causes of health sector  
33 inequalities with an application to malnutrition inequalities in Vietnam. *J Econom*  
34 2003;**112**:207–23.  
35  
36  
37  
38 39 Vellakkal S, Subramanian S V, Millett C, *et al*. Socioeconomic inequalities in non-  
39 communicable diseases prevalence in India: disparities between self-reported diagnoses  
40 and standardized measures. *PLoS One* 2013;**8**:e68219.  
41  
42  
43  
44 40 Duda RB, Anarfi JK, Adanu RMK, *et al*. The health of the “older women” in Accra,  
45 Ghana: results of the Women’s Health Study of Accra. *J Cross Cult Gerontol*  
46 2011;**26**:299–314.  
47  
48  
49  
50 41 Zhang H, d’Uva TB, Van Doorslaer E. The gender health gap in China: A decomposition  
51 analysis. *Econ Hum Biol* 2015;**18**:13–26.  
52  
53  
54  
55 42 Basu S, King AC. Disability and chronic disease among older adults in India: detecting  
56 vulnerable populations through the WHO SAGE Study. *Am J Epidemiol* 2013;**178**:1620–  
57  
58  
59

- 1  
2  
3 8.  
4  
5  
6 43 Dhak B. Gender difference in health and its determinants in the old-aged population in  
7 India. *J Biosoc Sci* 2009;**41**:625–43.  
8  
9  
10 44 Zeki Al Hazzouri A, Mehio Sibai A, Chaaya M, *et al.* Gender differences in physical  
11 disability among older adults in underprivileged communities in Lebanon. *J Aging Health*  
12 2011;**23**:367–82.  
13  
14  
15  
16 45 Singh L, Arokiasamy P, Singh PK, *et al.* Determinants of gender differences in self-rated  
17 health among older population: evidence from India. *Sage Open*  
18 2013;**3**:2158244013487914.  
19  
20  
21  
22 46 Ghosh S, Husain Z. Economic independence, family support and perceived health status  
23 of elderly: Recent evidence from India. *Asia-Pacific Popul J* 2010;**25**:47–77.  
24  
25  
26  
27 47 Agarwal A, Lubet A, Mitgang E, *et al.* Population Aging in India: Facts, Issues, and  
28 Options. 2016.  
29  
30  
31 48 Zhou B, Chen K, Wang J, *et al.* Quality of life and related factors in the older rural and  
32 urban Chinese populations in Zhejiang province. *J Appl Gerontol* 2011;**30**:199–225.  
33  
34  
35  
36 49 Brinda EM, Attermann J, Gerdtham UG, *et al.* Socio-economic inequalities in health and  
37 health service use among older adults in India: results from the WHO Study on Global  
38 AGEing and adult health survey. *Public Health* 2016;**141**:32–41.  
39  
40  
41  
42 50 Iyer A, Sen G, Östlin P. The intersections of gender and class in health status and health  
43 care. *Glob Public Health* 2008;**3**:13–24.  
44  
45  
46  
47 51 Caldwell JC. Routes to low mortality in poor countries. *Popul Dev Rev* 1986;:171–220.  
48  
49  
50 52 Gupta M Das. Life course perspectives on women's autonomy and health outcomes. *Am*  
51 *Anthropol* 1995;**97**:481–91.  
52  
53  
54 53 Santow G. Social roles and physical health: the case of female disadvantage in poor  
55 countries. *Soc Sci Med* 1995;**40**:147–61.  
56  
57  
58  
59  
60

- 1  
2  
3 54 Schuler SR, Bates LM, Islam MDK. Paying for reproductive health services in  
4 Bangladesh: intersections between cost, quality and culture. *Health Policy Plan*  
5 2002;**17**:273–80.  
6  
7  
8  
9 55 Sen G, Östlin P. Gender inequity in health: why it exists and how we can change it. 2008.  
10  
11 56 Ravindran STK, Pinho H de. The right reforms? Health sector reforms and sexual and  
12 reproductive health. In: *The right reforms? Health sector reforms and sexual and*  
13 *reproductive health*. 2005.  
14  
15  
16  
17 57 Falkingham J. Poverty, out-of-pocket payments and access to health care: evidence from  
18 Tajikistan. *Soc Sci Med* 2004;**58**:247–58.  
19  
20  
21  
22 58 Balarajan Y, Selvaraj S, Subramanian S V. Health care and equity in India. *Lancet*  
23 2011;**377**:505–15.  
24  
25  
26  
27  
28  
29  
30  
31  
32  
33  
34  
35  
36  
37  
38  
39  
40  
41  
42  
43  
44  
45  
46  
47  
48  
49  
50  
51  
52  
53  
54  
55  
56  
57  
58  
59  
60

**Table 1.** Sample Distribution for Population aged 60 and above, WHO-SAGE, India

| Background Characteristics             | Males       |      | Females     |      | Total       |      |
|----------------------------------------|-------------|------|-------------|------|-------------|------|
|                                        | <i>n</i>    | %    | <i>n</i>    | %    | <i>n</i>    | %    |
| <b>Age of the Respondent</b>           |             |      |             |      |             |      |
| 60-64                                  | 615         | 30.0 | 613         | 33.8 | 1,228       | 31.9 |
| 65-69                                  | 589         | 29.3 | 500         | 25.8 | 1,089       | 27.5 |
| 70-74                                  | 395         | 21.2 | 335         | 20.1 | 730         | 20.6 |
| 75-79                                  | 206         | 11.8 | 153         | 9    | 359         | 10.4 |
| 80+                                    | 174         | 7.6  | 173         | 11.1 | 347         | 9.4  |
| <b>Marital Status</b>                  |             |      |             |      |             |      |
| Unmarried                              | 32          | 1.5  | 9           | 1.2  | 36          | 1.4  |
| Married                                | 1660        | 87.8 | 812         | 44.7 | 2,477       | 66.1 |
| Widowed                                | 287         | 10.5 | 953         | 54   | 1,240       | 32.5 |
| <b>Education of the Respondent</b>     |             |      |             |      |             |      |
| No formal education                    | 745         | 36.3 | 1320        | 75.6 | 2,149       | 56.2 |
| Less than primary                      | 317         | 12.9 | 159         | 9.6  | 446         | 11.2 |
| Completed primary                      | 341         | 19.5 | 161         | 8.9  | 494         | 14.2 |
| Completed secondary                    | 234         | 13.0 | 59          | 2.4  | 275         | 7.6  |
| Completed HS                           | 203         | 11.8 | 52          | 2.2  | 234         | 6.9  |
| Completed college/university/post grad | 139         | 6.3  | 23          | 1.1  | 155         | 3.7  |
| <b>Religion of the Respondent</b>      |             |      |             |      |             |      |
| Hinduism                               | 1603        | 83.7 | 1473        | 86.9 | 3,076       | 85.3 |
| Islam                                  | 245         | 12.6 | 170         | 10.3 | 415         | 11.5 |
| Others                                 | 63          | 3.6  | 60          | 2.7  | 123         | 3.2  |
| <b>Ethnicity of the Respondent</b>     |             |      |             |      |             |      |
| Scheduled Tribe                        | 114         | 5.4  | 73          | 4.5  | 187         | 5.0  |
| Scheduled Caste                        | 329         | 16.8 | 284         | 16.8 | 613         | 16.8 |
| No Caste or Tribe                      | 340         | 12.9 | 325         | 14.8 | 665         | 13.9 |
| Others                                 | 1122        | 64.8 | 1013        | 63.9 | 2,135       | 64.3 |
| <b>Place of Residence</b>              |             |      |             |      |             |      |
| Urban                                  | 472         | 29.6 | 501         | 30.4 | 973         | 30.1 |
| Rural                                  | 1507        | 70.3 | 1273        | 69.5 | 2,780       | 69.9 |
| <b>Wealth Quintile</b>                 |             |      |             |      |             |      |
| Poorest                                | 387         | 22.5 | 363         | 24.8 | 750         | 23.7 |
| Poor                                   | 403         | 22.6 | 344         | 21.9 | 747         | 22.3 |
| Middle                                 | 358         | 17.5 | 346         | 19.4 | 704         | 18.5 |
| Higher                                 | 382         | 17.5 | 309         | 15.9 | 691         | 16.8 |
| Highest                                | 381         | 19.7 | 341         | 17.7 | 722         | 18.8 |
| <b>Tobacco Use</b>                     |             |      |             |      |             |      |
| No                                     | 523         | 24.7 | 1110        | 62.3 | 1,633       | 43.5 |
| Former/Current                         | 1387        | 75.2 | 592         | 37.6 | 1,979       | 56.5 |
| <b>Total</b>                           | <b>1979</b> |      | <b>1774</b> |      | <b>3753</b> |      |

**Table 2:** Contribution of Predictor Variables based on Decomposition Analysis for IADL among Older Population aged 60 years and above, WHO-SAGE 2007-08

| Covariates  | Mean        | Beta                | CI           | Contribution to CI | % Contribution | Adjusted % Contribution |
|-------------|-------------|---------------------|--------------|--------------------|----------------|-------------------------|
| Poor        | 0.41        | 0.107 <sup>^</sup>  | -0.58        | -0.03              | 38.65          | 38.52                   |
| Tobacco use | 0.55        | 0.04                | -0.06        | 0.00               | 2.14           | 2.13                    |
| Illiterate  | 0.68        | 0.165 <sup>#</sup>  | -0.13        | -0.02              | 22.56          | 22.48                   |
| SC/ST       | 0.22        | 0.05                | -0.25        | 0.00               | 4.35           | 4.33                    |
| Muslim      | 0.12        | 0.279 <sup>#</sup>  | -0.13        | -0.01              | 6.09           | 6.07                    |
| Rural       | 0.74        | 0.156 <sup>#</sup>  | -0.11        | -0.02              | 18.91          | 18.85                   |
| Married     | 0.65        | -0.223 <sup>#</sup> | 0.03         | -0.01              | 6.36           | 6.34                    |
| Older (70+) | 0.38        | 0.474 <sup>#</sup>  | 0.00         | 0.00               | -0.34          |                         |
| Female      | 0.47        | 0.172 <sup>#</sup>  | -0.01        | 0.00               | 1.28           | 1.28                    |
| <b>IADL</b> | <b>0.76</b> |                     | <b>-0.11</b> | <b>-0.09</b>       | <b>100.0</b>   | <b>100.0</b>            |

Significant levels: <0.01 = #; <0.05 = ^; <0.10 = \*

**Table 3:** Sex Stratified Contribution of Predictor Variables based on Decomposition Analysis for IADL among Older Population aged 60 years and above, WHO-SAGE 2007-08

| Covariates    | Mean        | Beta                | CI           | Contribution to CI | % Contribution | Adjusted % Contribution |
|---------------|-------------|---------------------|--------------|--------------------|----------------|-------------------------|
| <b>Male</b>   |             |                     |              |                    |                |                         |
| Poor          | 0.41        | 0.252 <sup>#</sup>  | -0.58        | -0.10              | 62.90          | 61.83                   |
| Tobacco use   | 0.73        | 0.00                | -0.06        | 0.00               | 0.00           |                         |
| Illiterate    | 0.54        | 0.233 <sup>#</sup>  | -0.21        | -0.04              | 26.98          | 26.52                   |
| SC/ST         | 0.23        | -0.03               | -0.24        | 0.00               | -1.73          |                         |
| Muslim        | 0.13        | 0.12                | -0.11        | 0.00               | 1.61           | 1.59                    |
| Rural         | 0.76        | 0.06                | -0.11        | -0.01              | 5.18           | 5.09                    |
| Married       | 0.84        | -0.200 <sup>#</sup> | 0.01         | 0.00               | 2.28           | 2.25                    |
| Older (70+)   | 0.39        | 0.402 <sup>#</sup>  | -0.02        | 0.00               | 2.77           | 2.73                    |
| <b>IADL</b>   | <b>0.6</b>  |                     | <b>-0.2</b>  | <b>-0.2</b>        | <b>100.0</b>   | <b>100.0</b>            |
| <b>Female</b> |             |                     |              |                    |                |                         |
| Poor          | 0.42        | -0.06               | -0.58        | 0.02               | -45.38         |                         |
| Tobacco use   | 0.35        | 0.07                | -0.09        | 0.00               | 7.60           | 4.74                    |
| Illiterate    | 0.84        | 0.00                | -0.08        | 0.00               | 0.23           | 0.14                    |
| SC/ST         | 0.21        | 0.145 <sup>*</sup>  | -0.26        | -0.01              | 26.32          | 16.43                   |
| Muslim        | 0.10        | 0.509 <sup>#</sup>  | -0.16        | -0.01              | 27.12          | 16.93                   |
| Rural         | 0.72        | 0.290 <sup>#</sup>  | -0.12        | -0.03              | 79.52          | 49.64                   |
| Married       | 0.45        | -0.244 <sup>#</sup> | 0.05         | -0.01              | 19.42          | 12.12                   |
| Older (70+)   | 0.37        | 0.551 <sup>#</sup>  | 0.02         | 0.01               | -14.81         |                         |
| <b>IADL</b>   | <b>0.90</b> |                     | <b>-0.04</b> | <b>-0.03</b>       | <b>100.0</b>   | <b>100.0</b>            |

Significant levels: <0.01 = #; <0.05 = ^; <0.10 = \*

**Table 4:** Contribution of Predictor Variables based on Decomposition Analysis for Chronic Disease of all the Older Population aged 60 years and above, WHO-SAGE 2007-08

| Covariates             | Mean        | Beta                | CI          | Contribution to CI | % Contribution | Adjusted % Contribution |
|------------------------|-------------|---------------------|-------------|--------------------|----------------|-------------------------|
| Poor                   | 0.41        | -0.113 <sup>#</sup> | -0.58       | 0.06               | 42.60          | 42.25                   |
| Tobacco                | 0.55        | 0.02                | -0.06       | 0.00               | -0.84          |                         |
| Illiterate             | 0.68        | -0.143 <sup>#</sup> | -0.13       | 0.03               | 20.47          | 20.30                   |
| SC/ST                  | 0.22        | -0.071 <sup>^</sup> | -0.25       | 0.01               | 6.13           | 6.07                    |
| Muslim                 | 0.12        | -0.03               | -0.13       | 0.00               | 0.65           | 0.65                    |
| Rural                  | 0.74        | -0.242 <sup>#</sup> | -0.11       | 0.05               | 30.73          | 30.48                   |
| Married                | 0.65        | 0.01                | 0.03        | 0.00               | 0.15           | 0.15                    |
| Older (70+)            | 0.38        | 0.091 <sup>#</sup>  | 0.00        | 0.00               | 0.07           | 0.07                    |
| Female                 | 0.47        | 0.00                | -0.01       | 0.00               | 0.03           | 0.03                    |
| <b>Chronic Disease</b> | <b>0.43</b> |                     | <b>0.15</b> | <b>0.15</b>        | <b>100.0</b>   | <b>100.0</b>            |

Significant levels: <0.01 = #; <0.05 = ^; <0.10 = \*



**Table 5:** Sex Stratified Contribution of Predictor Variables based on Decomposition Analysis for Chronic Disease of all the Older Population aged 60 years and above, WHO-SAGE 2007-08

| Covariates             | Mean        | Beta                | CI          | Contribution to CI | % Contribution | Adjusted % Contribution |
|------------------------|-------------|---------------------|-------------|--------------------|----------------|-------------------------|
| <b>Male</b>            |             |                     |             |                    |                |                         |
| Poor                   | 0.41        | -0.119 <sup>#</sup> | -0.58       | 0.06               | 45.75          | 45.04                   |
| Tobacco                | 0.73        | -0.01               | -0.06       | 0.00               | 0.36           | 0.35                    |
| Illiterate             | 0.54        | -0.104 <sup>#</sup> | -0.21       | 0.03               | 18.59          | 18.30                   |
| SC/ST                  | 0.23        | -0.03               | -0.24       | 0.00               | 3.05           | 3.00                    |
| Muslim                 | 0.13        | -0.07               | -0.11       | 0.00               | 1.61           | 1.59                    |
| Rural                  | 0.76        | -0.247 <sup>#</sup> | -0.11       | 0.04               | 31.78          | 31.28                   |
| Married                | 0.84        | 0.03                | 0.01        | 0.00               | 0.45           | 0.45                    |
| Older (70+)            | 0.39        | 0.149 <sup>#</sup>  | -0.02       | 0.00               | -1.59          |                         |
| <b>Chronic Disease</b> | <b>0.45</b> |                     | <b>0.14</b> | <b>0.14</b>        | <b>100.0</b>   | <b>100.0</b>            |
| <b>Female</b>          |             |                     |             |                    |                |                         |
| Poor                   | 0.42        | -0.115 <sup>#</sup> | -0.58       | 0.07               | 42.60          | 41.15                   |
| Tobacco                | 0.35        | 0.04                | -0.09       | 0.00               | -1.80          |                         |
| Illiterate             | 0.15        | -0.226 <sup>#</sup> | -0.08       | 0.04               | 23.32          | 22.53                   |
| SC/ST                  | 0.21        | -0.110 <sup>^</sup> | -0.26       | 0.02               | 9.27           | 8.95                    |
| Muslim                 | 0.10        | 0.03                | -0.16       | 0.00               | -0.84          |                         |
| Rural                  | 0.72        | -0.221 <sup>#</sup> | -0.12       | 0.05               | 28.09          | 27.14                   |
| Married                | 0.45        | -0.02               | 0.05        | 0.00               | -0.88          |                         |
| Older (70+)            | 0.37        | 0.02                | 0.02        | 0.00               | 0.24           | 0.24                    |
| <b>Chronic Disease</b> | <b>0.41</b> |                     | <b>0.16</b> | <b>0.16</b>        | <b>100.0</b>   | <b>100.0</b>            |

Significant levels: <0.01 = #; <0.05 = ^; <0.10 = \*

**STROBE Statement**

## Checklist of items that should be included in reports of observational studies

| Section/Topic             | Item No | Recommendation                                                                                                                                                                             | Reported on Page No |
|---------------------------|---------|--------------------------------------------------------------------------------------------------------------------------------------------------------------------------------------------|---------------------|
| <b>Title and abstract</b> | 1       | (a) Indicate the study's design with a commonly used term in the title or the abstract                                                                                                     | 1                   |
|                           |         | (b) Provide in the abstract an informative and balanced summary of what was done and what was found                                                                                        | 2                   |
| <b>Introduction</b>       |         |                                                                                                                                                                                            |                     |
| Background/rationale      | 2       | Explain the scientific background and rationale for the investigation being reported                                                                                                       | 4                   |
| Objectives                | 3       | State specific objectives, including any prespecified hypotheses                                                                                                                           | 4,5                 |
| <b>Methods</b>            |         |                                                                                                                                                                                            |                     |
| Study design              | 4       | Present key elements of study design early in the paper                                                                                                                                    | 5                   |
| Setting                   | 5       | Describe the setting, locations, and relevant dates, including periods of recruitment, exposure, follow-up, and data collection                                                            | 5                   |
| Participants              | 6       | (a) <i>Cohort study</i> —Give the eligibility criteria, and the sources and methods of selection of participants. Describe methods of follow-up                                            | 5                   |
|                           |         | <i>Case-control study</i> —Give the eligibility criteria, and the sources and methods of case ascertainment and control selection. Give the rationale for the choice of cases and controls |                     |
|                           |         | <i>Cross-sectional study</i> —Give the eligibility criteria, and the sources and methods of selection of participants                                                                      |                     |
| Variables                 | 7       | (b) <i>Cohort study</i> —For matched studies, give matching criteria and number of exposed and unexposed                                                                                   | 5,6,7               |
|                           |         | <i>Case-control study</i> —For matched studies, give matching criteria and the number of controls per case                                                                                 |                     |
| Data sources/measurement  | 8*      | Clearly define all outcomes, exposures, predictors, potential confounders, and effect modifiers. Give diagnostic criteria, if applicable                                                   | 5,6,7               |
| Bias                      | 9       | For each variable of interest, give sources of data and details of methods of assessment (measurement). Describe comparability of assessment methods if there is more than one group       | 7,8                 |
| Study size                | 10      | Describe any efforts to address potential sources of bias                                                                                                                                  | 10                  |
| Quantitative variables    | 11      | Explain how the study size was arrived at                                                                                                                                                  | 5                   |
| Statistical methods       | 12      | Explain how quantitative variables were handled in the analyses. If applicable, describe which groupings were chosen and why                                                               | 5                   |
|                           |         | (a) Describe all statistical methods, including those used to control for confounding                                                                                                      | 8,9                 |
|                           |         | (b) Describe any methods used to examine subgroups and interactions                                                                                                                        | 9                   |
|                           |         | (c) Explain how missing data were addressed                                                                                                                                                | 9                   |
|                           |         | (d) <i>Cohort study</i> —If applicable, explain how loss to follow-up was addressed                                                                                                        | 9                   |
|                           |         | <i>Case-control study</i> —If applicable, explain how matching of cases and controls was addressed                                                                                         | 9                   |
|                           |         | <i>Cross-sectional study</i> —If applicable, describe analytical methods taking account of sampling strategy                                                                               |                     |
|                           |         | (e) Describe any sensitivity analyses                                                                                                                                                      | 9                   |

| Section/Topic            | Item No | Recommendation                                                                                                                                                                                               | Reported on Page No |
|--------------------------|---------|--------------------------------------------------------------------------------------------------------------------------------------------------------------------------------------------------------------|---------------------|
| <b>Results</b>           |         |                                                                                                                                                                                                              |                     |
| Participants             | 13*     | (a) Report numbers of individuals at each stage of study—eg numbers potentially eligible, examined for eligibility, confirmed eligible, included in the study, completing follow-up, and analysed            | 5                   |
|                          |         | (b) Give reasons for non-participation at each stage                                                                                                                                                         |                     |
|                          |         | (c) Consider use of a flow diagram                                                                                                                                                                           |                     |
| Descriptive data         | 14*     | (a) Give characteristics of study participants (eg demographic, clinical, social) and information on exposures and potential confounders                                                                     | 10,11               |
|                          |         | (b) Indicate number of participants with missing data for each variable of interest                                                                                                                          |                     |
|                          |         | (c) <i>Cohort study</i> —Summarise follow-up time (eg, average and total amount)                                                                                                                             |                     |
| Outcome data             | 15*     | <i>Cohort study</i> —Report numbers of outcome events or summary measures over time                                                                                                                          | 11                  |
|                          |         | <i>Case-control study</i> —Report numbers in each exposure category, or summary measures of exposure                                                                                                         |                     |
|                          |         | <i>Cross-sectional study</i> —Report numbers of outcome events or summary measures                                                                                                                           |                     |
| Main results             | 16      | (a) Give unadjusted estimates and, if applicable, confounder-adjusted estimates and their precision (eg, 95% confidence interval). Make clear which confounders were adjusted for and why they were included | 10,11               |
|                          |         | (b) Report category boundaries when continuous variables were categorized                                                                                                                                    |                     |
|                          |         | (c) If relevant, consider translating estimates of relative risk into absolute risk for a meaningful time period                                                                                             |                     |
| Other analyses           | 17      | Report other analyses done—eg analyses of subgroups and interactions, and sensitivity analyses                                                                                                               | 10                  |
| <b>Discussion</b>        |         |                                                                                                                                                                                                              |                     |
| Key results              | 18      | Summarise key results with reference to study objectives                                                                                                                                                     | 12                  |
| Limitations              | 19      | Discuss limitations of the study, taking into account sources of potential bias or imprecision. Discuss both direction and magnitude of any potential bias                                                   | 14                  |
| Interpretation           | 20      | Give a cautious overall interpretation of results considering objectives, limitations, multiplicity of analyses, results from similar studies, and other relevant evidence                                   | 13                  |
| Generalisability         | 21      | Discuss the generalisability (external validity) of the study results                                                                                                                                        | 13                  |
| <b>Other Information</b> |         |                                                                                                                                                                                                              |                     |
| Funding                  | 22      | Give the source of funding and the role of the funders for the present study and, if applicable, for the original study on which the present article is based                                                | 15                  |

\*Give information separately for cases and controls in case-control studies and, if applicable, for exposed and unexposed groups in cohort and cross-sectional studies.

**Note:** An Explanation and Elaboration article discusses each checklist item and gives methodological background and published examples of transparent reporting. The STROBE checklist is best used in conjunction with this article (freely available on the Web sites of PLoS Medicine at <http://www.plosmedicine.org/>, Annals of Internal Medicine at <http://www.annals.org/>, and Epidemiology at <http://www.epidem.com/>). Information on the STROBE Initiative is available at [www.strobe-statement.org](http://www.strobe-statement.org).
